# Supplementary material
Source: PubMed Central journal article supplement (PMC5710474)
Supplement: jamapsychiatry-74-1065-s001.pdf [file jamapsychiatry-74-1065-s001.pdf]

## Supplementary Online Content

Smeland OB, Frei O, Kauppi K, et al; NeuroCHARGE (Cohorts for Heart and Aging Research in Genomic Epidemiology) Cognitive Working Group. Identification of genetic loci jointly influencing schizophrenia risk and the cognitive traits of verbal-numerical reasoning, reaction time, and general cognitive function. *JAMA Psychiatry*. Published online July 26, 2017. doi:10.1001/jamapsychiatry.2017.1986

### **eAppendix.** Methods

**eFigure 1.** Conditional Q-Q Plots of Cognitive Traits Given Association With Schizophrenia

**eFigure 2.** Averaged Regional mRNA Expression Distribution in the Adult Human Brain of Genes Implicated in Schizophrenia and General Cognitive Function, Verbal-Numerical Reasoning, and Reaction Time

**eFigure 3.** Expression Trajectories of Genes Annotated to Loci Shared Between Schizophrenia and General Cognitive Function, Verbal-Numerical Reasoning, and Reaction Time in the Developmental and Adult Human Brain

**eFigure 4.** Top-ranked Gene Sets Enriched for Genes in Loci Associated With Schizophrenia and General Cognitive Function Identified Using DEPICT Analysis

**eTable 1.** Loci With  $cFDR < .01$  Associated With Cognitive Traits Given Association With Schizophrenia

**eTable 2.** Effect Sizes of SNPs in LD With Conjunctive Loci With Ambiguous Effect Directionality

**eTable 3.** List of Gene Loci (Unpruned) With Conjunctive False Discovery Rate ( $conjFDR < .10$ ) Associated With Schizophrenia (SCZ) and General Cognitive Function in the CHARGE Cohort (COG CHARGE), COG in the COGENT Cohort (COG COGENT), Verbal-Numerical Reasoning (VNR) or Reaction Time (RT)

**eTable 4.** Significant eQTL Functionality of SNPs With Conjunction  $FDR < .05$  Identified Using GTEx

**eTable 5.** Cis-eQTL Data in Human Brain Using UK Brain Expression Consortium Data

### **eReferences**

This supplementary material has been provided by the authors to give readers additional information about their work.

## eAppendix. Methods

### Conditional True Discovery Rate

The ‘enrichment’ seen in the conditional Q-Q plots can be directly interpreted in terms of true discovery rate (TDR = 1 – false discovery rate (FDR))<sup>1</sup>. More specifically, for a given p-value cut-off, the FDR is defined as

$$\text{FDR}(p) = \pi_0 F_0(p) / F(p), \quad [1]$$

where  $\pi_0$  is the proportion of null SNPs,  $F_0$  is the null cumulative distribution function (cdf), and  $F$  is the cdf of all SNPs, both null and non-null<sup>2</sup>. Under the null hypothesis,  $F_0$  is the cdf of the uniform distribution on the unit interval [0,1], so that Eq. [1] reduces to

$$\text{FDR}(p) = \pi_0 p / F(p), \quad [2]$$

The cdf  $F$  can be estimated by the empirical cdf  $q = N_p / N$ , where  $N_p$  is the number of SNPs with p-values less than or equal to  $p$ , and  $N$  is the total number of SNPs. Replacing  $F$  by  $q$  in Eq. [2], we get

$$\text{Estimated FDR}(p) = \pi_0 p / q, \quad [3]$$

which is biased upwards as an estimate of the FDR<sup>3</sup>. Replacing  $\pi_0$  in Equation [3] with unity gives an estimated FDR that is further biased upward;

$$q^* = p/q \quad [4]$$

If  $\pi_0$  is close to one, as is likely true for most GWASs, the increase in bias from Eq. [3] is minimal. The quantity  $1 - p/q$ , is therefore biased downward, and hence a conservative estimate of the TDR. Referring to the Q-Q plots, we see that  $q^*$  is equivalent to the nominal p-value divided by the empirical quantile, as defined earlier. We can thus read the FDR estimate directly off the Q-Q plot as

$$-\log_{10}(q^*) = \log_{10}(q) - \log_{10}(p), \quad [5]$$

i.e. the horizontal shift of the curves in the Q-Q plots from the expected line  $x = y$ , with a larger shift corresponding to a smaller FDR. This is illustrated in Figure 1 and Supplementary Figure 1.

### Conditional Q-Q plots

In conditional Q-Q plots, earlier and steeper departures from the null line (leftward shift) with higher levels of association with a secondary trait indicate a greater proportion of true associations for a given nominal p-value. Q-Q plots compare a nominal probability distribution against an empirical distribution. In the presence of all null relationships, nominal p-values form a straight line on a Q-Q plot when plotted against the empirical distribution. For schizophrenia (SCZ) and all cognitive traits SNPs and for each categorical subset (strata),  $-\log_{10}$  nominal p-values were plotted against  $-\log_{10}$  empirical p-values (conditional Q-Q plots). Leftward deflections of the observed distribution from the projected null line reflect increased tail probabilities in the distribution of test statistics (z-scores) and consequently an over-abundance of low p-values compared to that expected by chance, also named ‘enrichment’.

Under large-scale testing paradigms, such as GWAS, quantitative estimates of likely true associations can be estimated from the distributions of summary statistics<sup>2,4</sup>. One common method for visualizing the enrichment of statistical association relative to that expected under the global null hypothesis is through Q-Q plots of nominal p-values obtained from GWAS summary statistics. The usual Q-Q curve has as the y-ordinate the nominal p-value, denoted by “p”, and as the x-ordinate the corresponding value of the empirical cdf, denoted by “q”. Under the global null hypothesis the theoretical distribution is uniform on the interval [0,1]. As is common in GWAS, we instead plot  $-\log_{10} p$  against  $-\log_{10} q$  to emphasize tail probabilities of the theoretical and empirical distributions. Therefore, genetic enrichment results in a leftward shift in the Q-Q curve, corresponding to a larger fraction of SNPs with nominal  $-\log_{10} p$ -value greater than or equal to a given threshold. Conditional Q-Q plots are constructed by creating subsets of SNPs based on levels of an auxiliary measure for each SNP, and computing Q-Q plots separately for each level. If SNP enrichment is captured by variation in the auxiliary measure, this is expressed as successive leftward deflections in a conditional Q-Q plot as levels of the auxiliary measure increase. We constructed conditional Q-Q plots of empirical quantiles of nominal  $-\log_{10}$  values for SNP association with SCZ for all SNPs, and for subsets (strata) of SNPs determined by the nominal p-values of their association with cognitive traits, and vice versa. Specifically, we computed the empirical cumulative distribution of nominal p-values (cdf(p)) for a given phenotype for all SNPs and for SNPs with significance levels below the indicated cut-offs for the other phenotypes ( $-\log_{10}(p) \geq 1$ ,  $-\log_{10}(p) \geq 2$ ,  $-\log_{10}(p) \geq 3$  corresponding to  $p < 0.1$ ,  $p < 0.01$ ,  $p < 0.001$  respectively). The nominal p-values ( $-\log_{10}(p)$ ) are plotted on the y-axis, and the empirical quantiles ( $-\log_{10}(q)$ , where  $q=1-\text{cdf}(p)$ ) are plotted on the x-axis. To assess for polygenic effects below the standard GWAS significance threshold, we focused the conditional Q-Q plots on SNPs with nominal  $-\log_{10}(p) < 7.3$  (corresponding to  $p > 5 \times 10^{-8}$ ). To control for spurious enrichment, all plots were constructed after random pruning averaged over 200 iterations. At each iteration, one SNP in every linkage disequilibrium (LD) block (defined by an  $r^2 > 0.1$ ) was randomly selected and the empirical cumulative distribution functions were computed using the corresponding p-values. We also excluded SNPs within the extended major histocompatibility complex (MHC) (human genome build 19 location 25652429–33368333) and SNPs in LD ( $r^2 > 0.1$ ) with such SNPs given

the long range LD in this region and strong association with SCZ<sup>5</sup>.

### **Detection of loci using conditional FDR**

The standard FDR framework derives from a model assuming that the distribution of test statistics in a GWAS can be formulated as a mixture of null and non-null effects, with true associations (non-null effects) having more extreme test statistics than false associations (null effects). The FDR can be interpreted as the probability that a SNP is null given that its p-value is as small as or smaller than its observed p-value. Conjunctive FDR (conjFDR), denoted by  $FDR_{\text{trait1|trait2}}$ , is defined as the posterior probability that a given SNP is null for the first trait given that the p-values for both traits are as small as or smaller than the observed p-values<sup>6-9</sup>. Conjunctive cFDR, denoted by  $FDR_{\text{trait1\&trait2}}$  is defined as the posterior probability that a SNP is null for either phenotype or both simultaneously, given that its p-values for both traits are as small as or smaller than the observed p-values<sup>6-8</sup>. We obtained an estimate of conjFDR via the cFDR. A conservative estimate of  $FDR_{\text{trait1\&trait2}}$  is given by the maximum between  $FDR_{\text{trait1|trait2}}$  and  $FDR_{\text{trait2|trait1}}$ <sup>10</sup>. It is important to note that ranking SNPs by standard FDRs or by p-values gives the same ordering of SNPs. In contrast, cFDR reorders SNPs which results in a different ranking than that based on p-values alone.

To visualize the location of the shared genetic variants associated with SCZ and cognitive traits, we constructed 'conjFDR Manhattan plots', showing all SNPs with a significant conjunctive cFDR within an LD block in relation to their chromosomal location. The strongest signal was identified after ranking all SNPs based on the conjunctive cFDR and removing SNPs in LD  $r^2 > 0.1$  with any higher ranked SNP. The risk loci were annotated to the closest gene. We investigated the direction of allelic effects in the conjunctive loci by comparing their SCZ z-scores against their cognitive trait z-scores. For conjunctive loci showing ambiguous directionality of allelic effects, we identified SNPs in LD with these loci and compared their z-scores in SCZ and cognitive traits. We also constructed 'cFDR Manhattan plots' for COG, VNR and RT, showing all SNPs with a significant cFDR within an LD block in relation to their chromosomal location.

### **Brain gene expression**

We determined the overall messenger RNA (mRNA) expression in the human brain of genes jointly implicated in SCZ and cognitive traits. Using the publically available dataset from the Human Brain Transcriptome project at <http://hbatlas.org>, we assessed mRNA expression trajectories in six regions of the developing and adult human brain. Spanning periods from embryonic development to late adulthood, this dataset provides genome-wide, exon-level transcriptome data generated using the Affymetrix GeneChip Human Exon 1.0 ST Arrays from over 1,340 tissue samples from both hemispheres of postmortem human brains (n=57)<sup>11</sup>. Additionally, we determined the regional distribution of mRNA expression of the implicated genes in the adult human brain using the publically available dataset from The UK Human Brain Expression Consortium (<https://ukbec.wordpress.com/>). This dataset is based on exon array profiling using the Affymetrix GeneChip Human Exon 1.0 ST Arrays of 1,231 samples from 10 brain areas originating from 134 individuals. A full description of the study is provided in Trabzuni et al (2011)<sup>12</sup>. The data was downloaded from <http://www.braineac.org/>.

### **Gene set enrichment analysis**

To assess for enrichment of gene sets in the conjunctive loci shared between SCZ and COG, we applied a gene set enrichment method, DEPICT (Data-driven Expression Prioritized Integration for Complex Traits; [www.broadinstitute.org/depict](http://www.broadinstitute.org/depict))<sup>13</sup>. DEPICT assesses whether any of 14,461 reconstituted gene sets are significantly enriched for genes in the associated loci, and prioritizes genes that share predicted functions with genes from the other associated loci more often than expected by chance. The reconstituted gene sets are defined by membership probability for each gene based on their functional characterization in a probabilistic framework rather than using a binary indication<sup>13</sup>. We applied DEPICT analysis on loci with conjFDR < .20 shared between SCZ and COG.

**eFigure 1.** Conditional Q-Q Plots of Cognitive Traits Given Association With Schizophrenia  
 Conditional Q-Q plots of nominal versus empirical  $-\log_{10}$  p-values (corrected for inflation) in general cognitive function (COG) in the CHARGE cohort (COG CHARGE), COG in the COGENT cohort (COG COGENT), reaction time (RT) and verbal-numerical reasoning (VNR) as a function of significance of association with SCZ below the standard GWAS threshold of  $p < 5 \times 10^{-8}$  at the level of  $-\log_{10}(p) \geq 1$ ,  $-\log_{10}(p) \geq 2$ ,  $-\log_{10}(p) \geq 3$  corresponding to  $p \leq 0.1$ ,  $p \leq 0.01$ ,  $p \leq 0.001$ , respectively. The blue lines indicate all SNPs. The dashed lines indicate the null hypothesis.

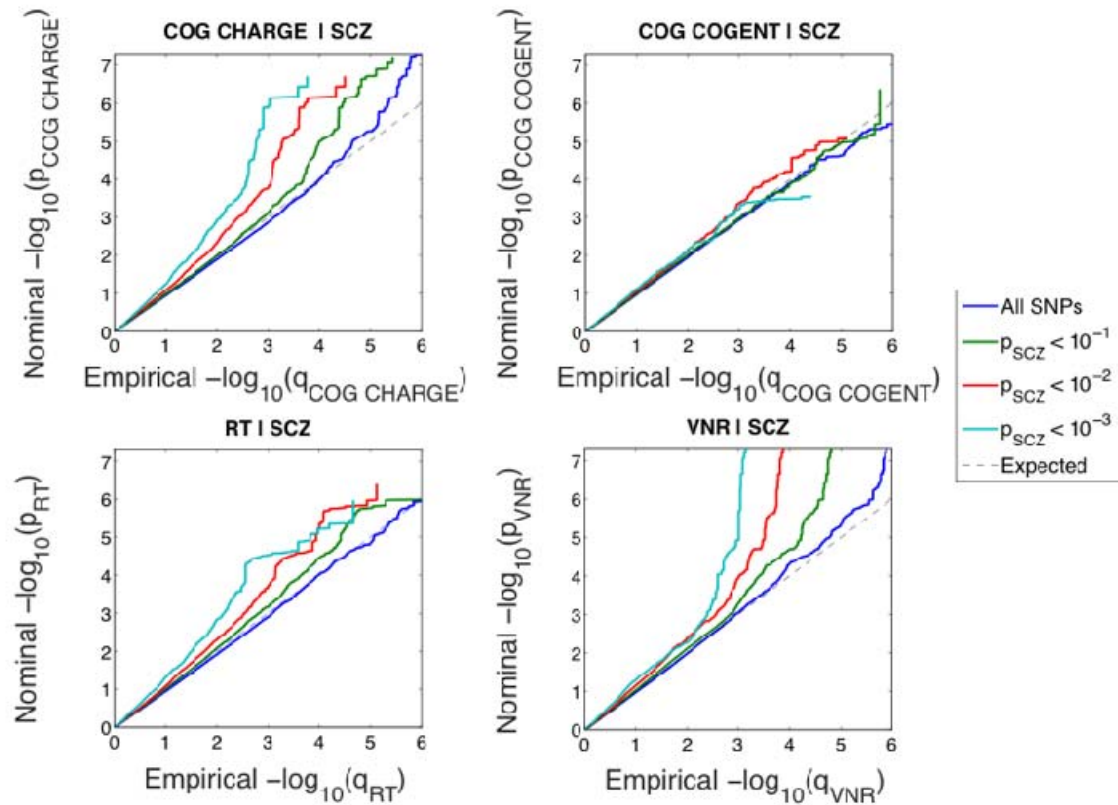

**Figure 2.** Averaged Regional mRNA Expression Distribution in the Adult Human Brain of Genes Implicated in Schizophrenia and General Cognitive Function, Verbal-Numerical Reasoning, and Reaction Time

Expression levels are indicated by color intensity in the log<sub>2</sub> scale. Data is provided by The UK Human Brain Expression Consortium and downloaded from <http://www.brainiac.org/>. Gene symbols are shown at the x axis. Brain structures shown at the y axis include temporal cortex (TCTX), occipital cortex (OCTX), frontal cortex (FCTX), intralobular white matter (WHMT), substantia nigra (SNIG), medulla (MEDU), cerebellar cortex (CRBL), thalamus (THAL), putamen (PUTM), hippocampus (HIPPI) and the average of all structures (aveALL).

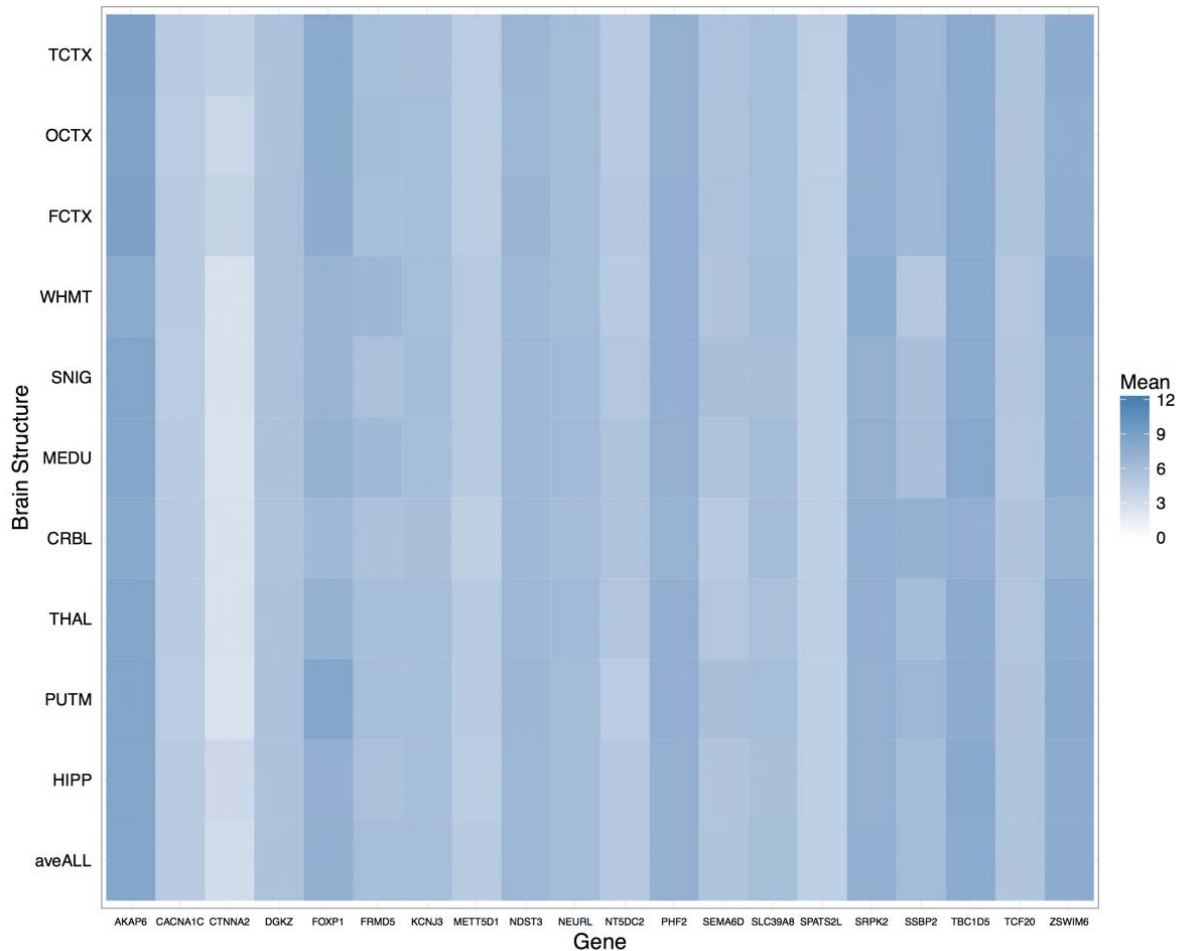

**eFigure 3.** Expression Trajectories of Genes Annotated to Loci Shared Between Schizophrenia and General Cognitive Function, Verbal-Numerical Reasoning, and Reaction Time in the Developmental and Adult Human Brain

Line plots show the  $\log_2$ -transformed gene exon array signal intensity from the early fetal period to late adulthood in six brain regions. The solid line between periods 7 and 8 (approximately post-conception day 280) separates prenatal from postnatal periods. Data were generated using Affymetrix GeneChip Human Exon 1.0 ST Arrays by the Human Brain Transcriptome project, and accessed via their publicly available database at <http://hbatlas.org><sup>11</sup>. Abbreviations: NCX = neocortex; HIP = hippocampus; AMY = amygdala; STR = striatum; MD = mediodorsal nucleus of the thalamus; CBC = cerebellar cortex.

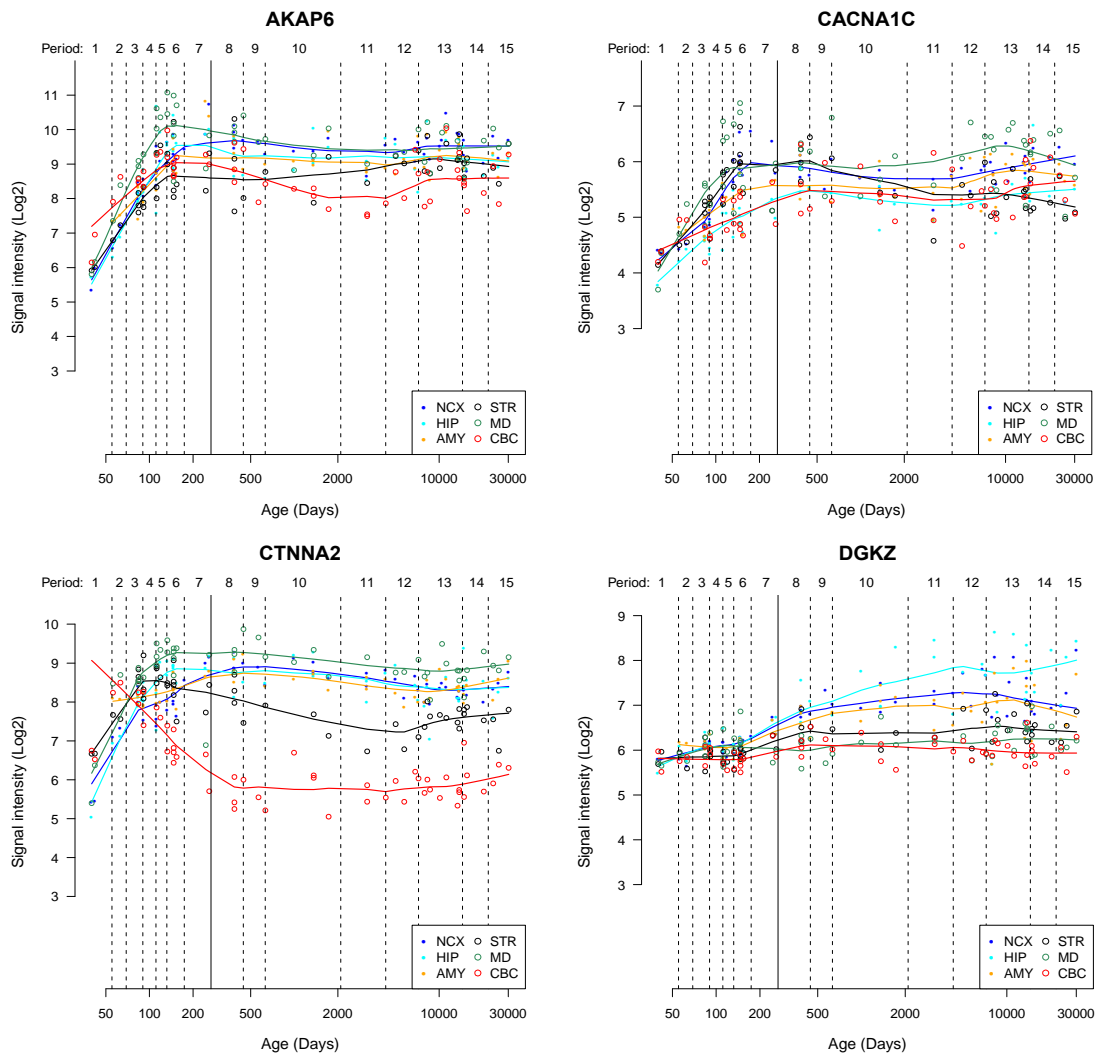

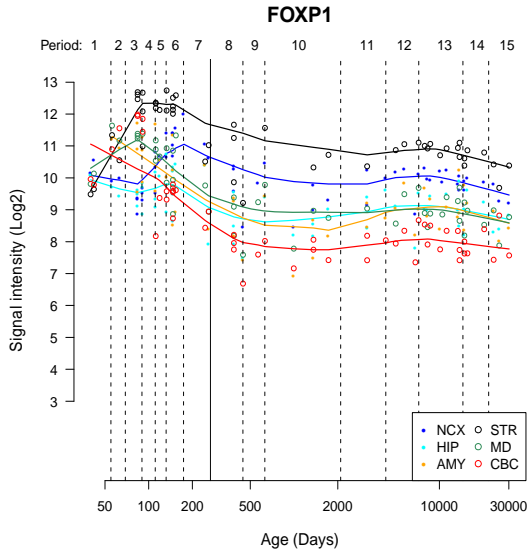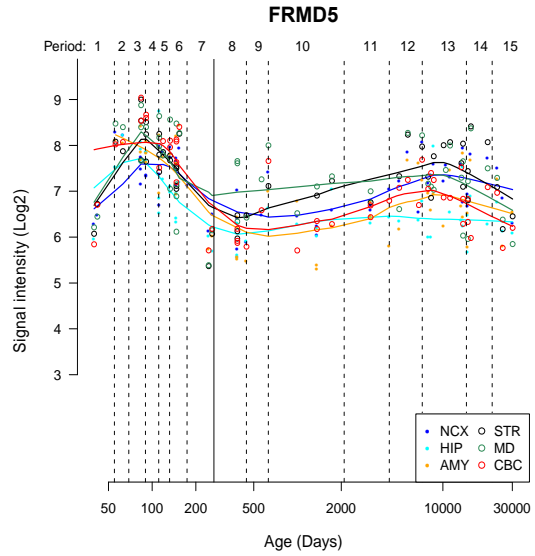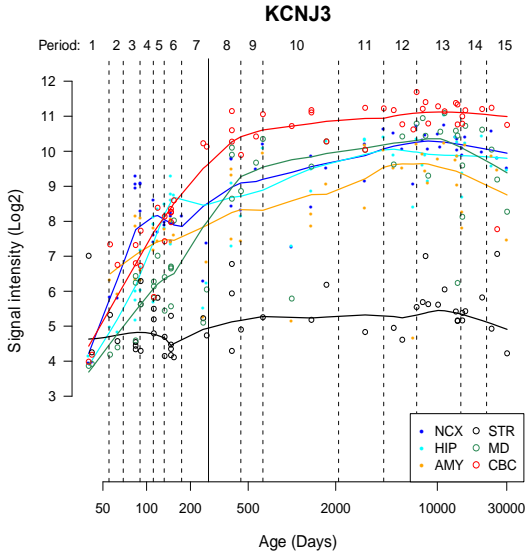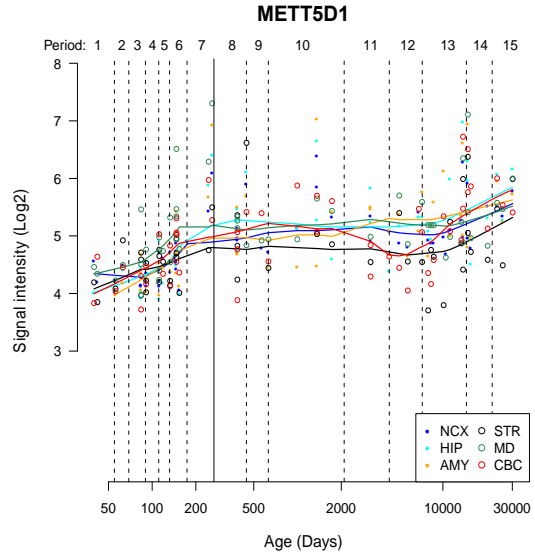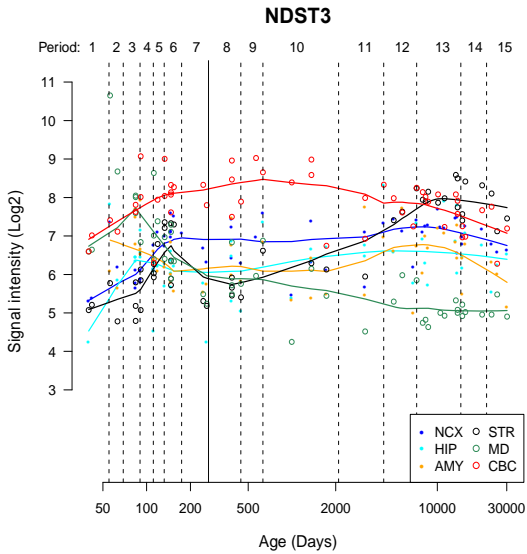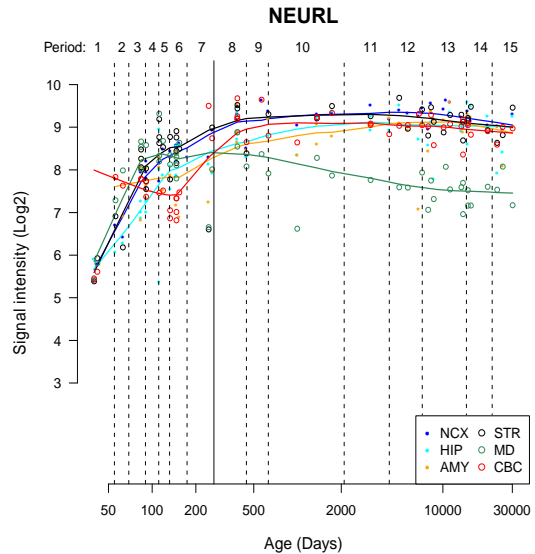

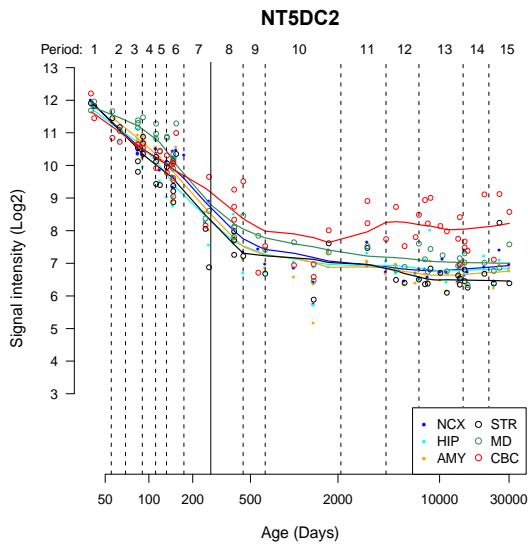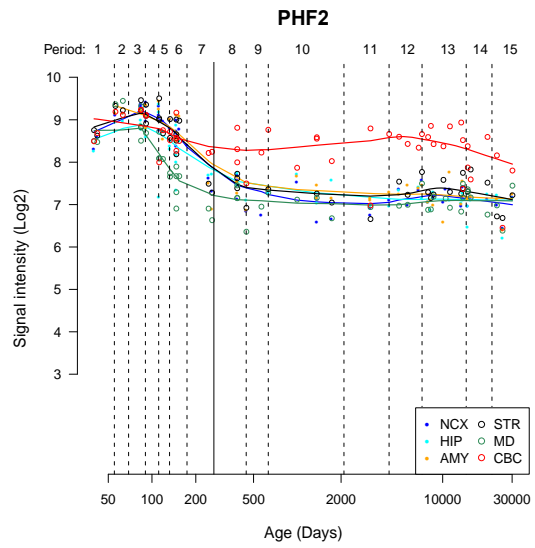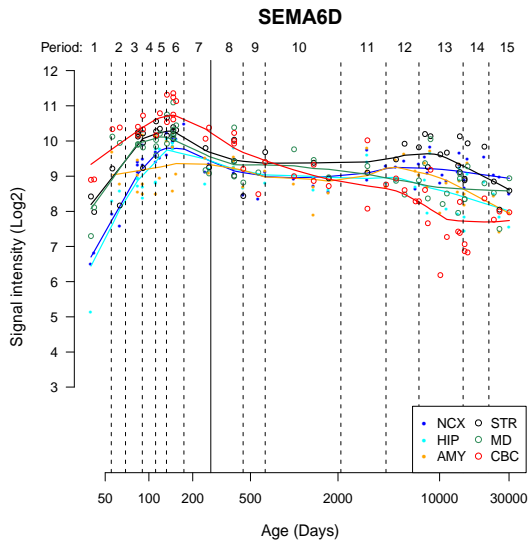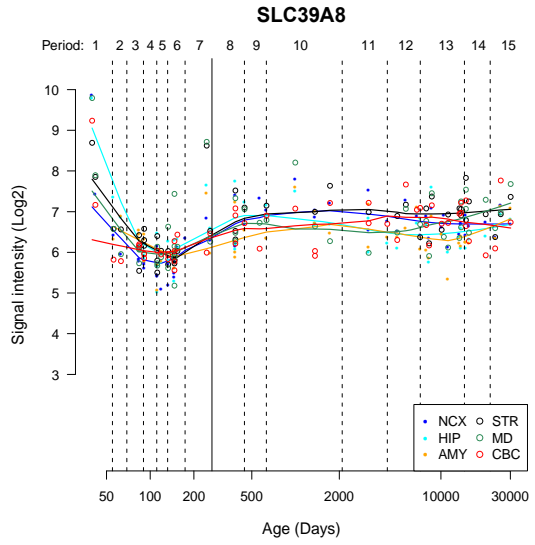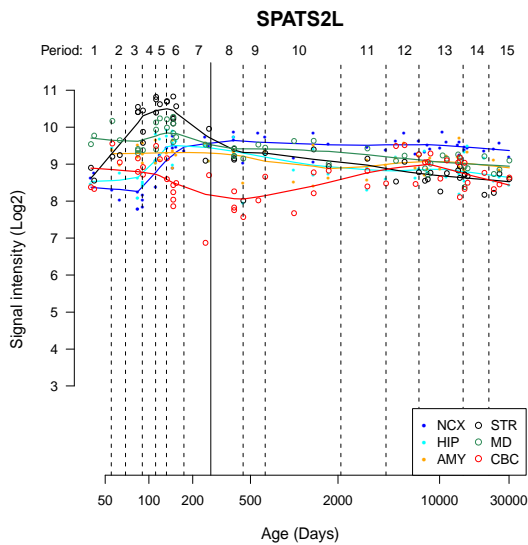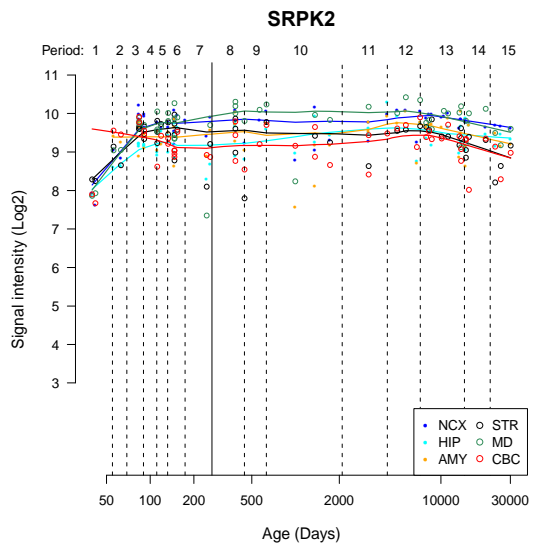



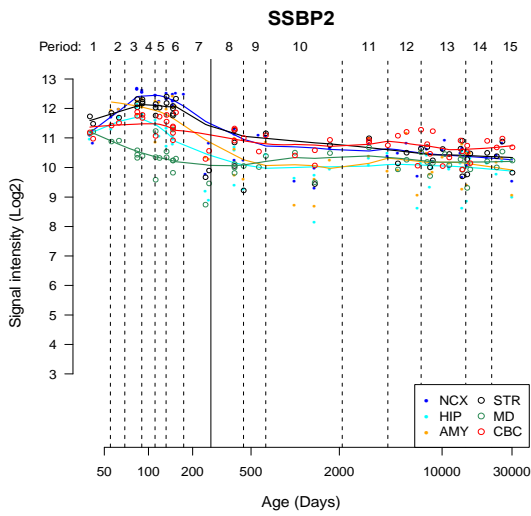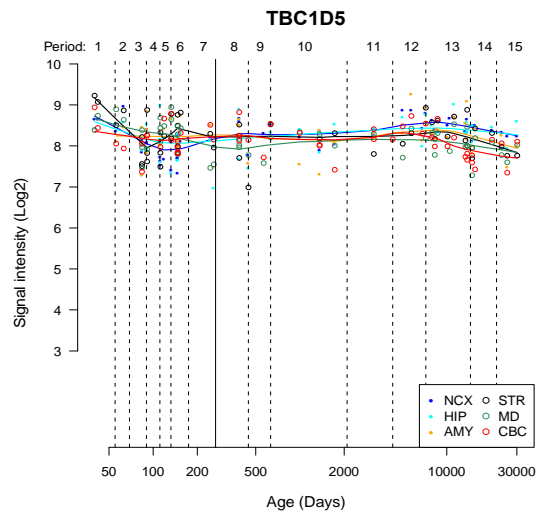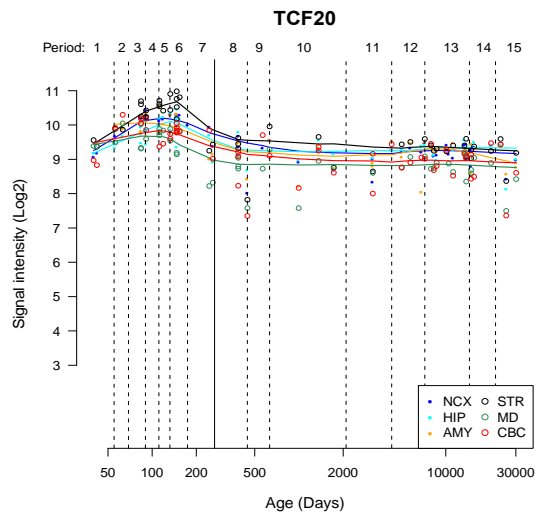

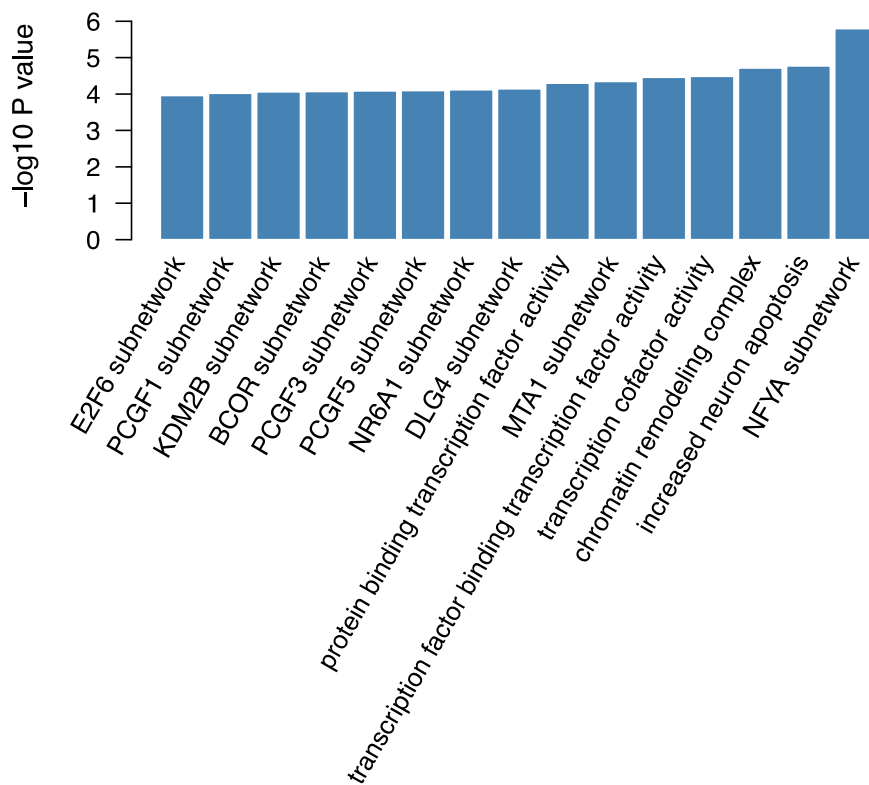

**eFigure 4.** Top-ranked gene sets enriched for genes in loci associated with schizophrenia and general cognitive function (conjunctive FDR<.20) identified using DEPICT analysis<sup>13</sup>.

**eTable 1.** Loci With cFDR<.01 Associated With Cognitive Traits Given Association With Schizophrenia. cFDR Manhattan plots are presented in Figure 2.

**Loci associated with general cognitive function (COG) in the CHARGE cohort at cFDR<.01**

| Locus | SNP        | Gene Id         | Chr | Position  | P COG CHARGE | FDR COG CHARGE | cFDR COG CHARGE   SCZ |
|-------|------------|-----------------|-----|-----------|--------------|----------------|-----------------------|
| 1     | rs12986588 | <i>CTNNA2</i>   | 2   | 80116325  | 2,74E-05     | 2,33E-01       | 4,58E-03              |
| 2     | rs13303    | <i>STAB1</i>    | 3   | 52558008  | 2,01E-05     | 2,11E-01       | 3,13E-03              |
| 3     | rs6838310  | <i>NDST3</i>    | 4   | 118878133 | 4,43E-06     | 1,79E-01       | 6,72E-04              |
| 4     | rs6452790  | <i>TMEM161B</i> | 5   | 87756708  | 5,24E-06     | 1,79E-01       | 7,61E-03              |
| 5     | rs1487441  | <i>AK091365</i> | 6   | 98553894  | 8,64E-08     | 2,96E-02       | 3,02E-04              |
| 6     | rs17522122 | <i>AKAP6</i>    | 14  | 33302882  | 1,87E-07     | 4,44E-02       | 3,67E-05              |
| 7     | rs10119    | <i>TOMM40</i>   | 19  | 45406673  | 4,98E-08     | 2,46E-02       | 5,62E-03              |
| 8     | rs5758659  | <i>TCF20</i>    | 22  | 42622003  | 4,74E-06     | 1,79E-01       | 8,39E-04              |

**Loci associated with COG in the COGENT cohort at cFDR<.01**

| Locus | SNP        | Gene Id         | Chr | Position  | P COG COGENT | FDR COG COGENT | cFDR COG COGENT   SCZ |
|-------|------------|-----------------|-----|-----------|--------------|----------------|-----------------------|
| 1     | rs7581162  | <i>BCL11A</i>   | 2   | 60704484  | 2,64E-05     | 9,27E-01       | 8,16E-03              |
| 2     | rs34349601 | <i>AK096499</i> | 2   | 199553892 | 5,15E-06     | 9,30E-01       | 8,85E-03              |
| 3     | rs13098807 | <i>ARPP-21</i>  | 3   | 35613088  | 4,13E-07     | 8,48E-01       | 7,64E-03              |

**Loci associated with verbal-numerical reasoning (VNR) at cFDR<.01**

| Locus | SNP        | Gene Id         | Chr | Position  | P VNR    | FDR VNR  | cFDR VNR   SCZ |
|-------|------------|-----------------|-----|-----------|----------|----------|----------------|
| 1     | rs1349265  | <i>THRB</i>     | 3   | 24159387  | 2,33E-06 | 8,51E-02 | 2,22E-03       |
| 2     | rs13105682 | <i>BANK1</i>    | 4   | 102702364 | 8,77E-06 | 1,63E-01 | 1,56E-03       |
| 3     | rs3897757  | <i>APBA1</i>    | 9   | 72075130  | 2,38E-06 | 8,51E-02 | 6,83E-03       |
| 4     | rs4295766  | <i>FLJ00199</i> | 9   | 131838821 | 2,73E-05 | 2,55E-01 | 5,91E-03       |
| 5     | rs5758605  | <i>CYP2D6</i>   | 22  | 42541349  | 8,28E-11 | 2,02E-04 | 2,13E-08       |

**Loci associated with reaction time (RT) at cFDR<.01**

| <b>Locus</b> | <b>SNP</b> | <b>Gene Id</b> | <b>Chr</b> | <b>Position</b> | <b>P RT</b> | <b>FDR RT</b> | <b>cFDR RT   SCZ</b> |
|--------------|------------|----------------|------------|-----------------|-------------|---------------|----------------------|
| 1            | rs13020196 | <i>SPATS2L</i> | 2          | 201071942       | 5,19E-07    | 1,00E-01      | 1,10E-04             |
| 2            | rs7785252  | <i>SUN1</i>    | 7          | 902394          | 1,02E-06    | 1,10E-01      | 9,04E-03             |
| 3            | rs55934002 | <i>PHF2</i>    | 9          | 96369424        | 2,77E-05    | 2,39E-01      | 5,43E-03             |
| 4            | rs12577142 | <i>DGKZ</i>    | 11         | 46377770        | 8,86E-06    | 2,18E-01      | 1,78E-03             |

**eTable 2.** Effect Sizes of SNPs in LD With Conjunctural Loci With Ambiguous Effect Directionality

**A. Effect sizes of SNPs in LD with rs13024343, rs1545424 and rs12253987 shared between schizophrenia (SCZ) and general cognitive function (COG) (conjFDR<.05) with ambiguous direction of allelic effects (Table 1)**

| SNP        | Proxy      | Distance | R <sup>2</sup> | DPrime | COG GWAS<br>Davies et al. (2015) |       |         |          | Schizophrenia GWAS<br>Schizophrenia Working Group et al. (2014) |       |        |          |
|------------|------------|----------|----------------|--------|----------------------------------|-------|---------|----------|-----------------------------------------------------------------|-------|--------|----------|
|            |            |          |                |        | SNP Id                           | A1/A2 | Beta    | P        | SNP Id                                                          | A1/A2 | or     | p        |
| rs13024343 | rs13034462 | 10816    | 0.908          | 1      | rs13034462                       | t/g   | -0.0603 | 7,13E-06 | rs13034462                                                      | t/g   | 0,9035 | 1,20E-04 |
| rs13024343 | rs12986588 | 13985    | 0.822          | 0.907  | rs12986588                       | t/c   | 0.0605  | 7,40E-06 | rs12986588                                                      | t/c   | 1,1072 | 1,15E-04 |
| rs13024343 | rs12987105 | 7230     | 0.73           | 1      | rs12987105                       | t/c   | -0.0605 | 8,87E-06 | rs12987105                                                      | t/c   | 0,8990 | 6,06E-05 |
| rs13024343 | rs4591366  | 52244    | 0.457          | 0.795  | rs4591366                        | t/c   | 0.0173  | 4,45E-02 | rs4591366                                                       | t/c   | 1,0163 | 3,03E-01 |
| rs13024343 | rs12713994 | 33751    | 0.423          | 0.793  | rs12713994                       | a/g   | 0.0227  | 1,25E-02 | rs12713994                                                      | a/g   | 1,0312 | 7,40E-02 |
| rs1545424  | rs1375817  | 16       | 1              | 1      | rs1375817                        | t/c   | -0.0243 | 2,02E-04 | rs1375817                                                       | t/c   | 1,0527 | 2,31E-06 |
| rs1545424  | rs2596672  | 1016     | 1              | 1      | rs2596672                        | a/g   | 0.0141  | 1,04E-02 | rs2596672                                                       | a/g   | 0,9501 | 2,61E-06 |
| rs1545424  | rs2122368  | 4552     | 1              | 1      | rs2122368                        | a/g   | 0.0141  | 1,07E-02 | rs2122368                                                       | a/g   | 0,9499 | 2,38E-06 |
| rs1545424  | rs1375818  | 4893     | 1              | 1      | rs1375818                        | t/c   | -0.0141 | 1,04E-02 | rs1375818                                                       | t/c   | 1,0523 | 2,77E-06 |
| rs1545424  | rs1597393  | 6250     | 1              | 1      | rs1597393                        | t/c   | -0.014  | 1,08E-02 | rs1597393                                                       | t/c   | 1,0532 | 2,20E-06 |
| rs12253987 | rs11191727 | 8574     | 0.468          | 0.708  | rs11191727                       | t/c   | 0.0179  | 3,17E-02 | rs11191727                                                      | t/c   | 0,9562 | 3,49E-03 |
| rs12253987 | rs12413931 | 114641   | 0.433          | 1      | rs12413931                       | t/c   | 0.0126  | 1,70E-01 | rs12413931                                                      | t/c   | 0,9618 | 3,48E-02 |
| rs12253987 | rs11191724 | 12347    | 0.411          | 0.83   | rs11191724                       | a/g   | 0.0181  | 1,50E-02 | rs11191724                                                      | a/g   | 0,9389 | 4,33E-06 |
| rs12253987 | rs7904046  | 31041    | 0.407          | 0.638  | rs7904046                        | a/c   | 0.0165  | 3,01E-02 | rs7904046                                                       | a/c   | 0,9525 | 7,10E-04 |
| rs12253987 | rs7893473  | 21345    | 0.338          | 0.621  | rs7893473                        | c/g   | 0.0167  | 2,84E-02 | rs7893473                                                       | c/g   | 0,9480 | 2,21E-04 |

**B. Effect sizes of SNPs in LD with rs7857165 shared between SCZ and reaction time (RT) (conjFDR<.05) with ambiguous direction of allelic effects (Table 1)**

| SNP       | Proxy       | Distance | R <sup>2</sup> | DPrime | RT GWAS.<br>Davies et al. (2016) |       |         |            | Schizophrenia GWAS<br>Schizophrenia Working Group et al. (2014) |       |        |          |
|-----------|-------------|----------|----------------|--------|----------------------------------|-------|---------|------------|-----------------------------------------------------------------|-------|--------|----------|
|           |             |          |                |        | SNP Id                           | A1/A2 | RT Beta | RT P-value | SNP Id                                                          | A1/A2 | or     | p        |
| rs7857165 | rs4146138   | 541      | 1              | 1      | rs4146138                        | t/c   | 0,0590  | 7,72E-06   | rs4146138                                                       | t/c   | 1,1294 | 5,09E-05 |
| rs7857165 | rs117162228 | 6075     | 0,661          | 1      | rs117162228                      | a/g   | 0,0017  | 9,15E-01   | rs117162228                                                     | a/g   | 1,0985 | 1,97E-02 |
| rs7857165 | rs7044283   | 830      | 0,496          | 1      | rs7044283                        | t/g   | 0,0590  | 7,72E-06   | rs7044283                                                       | t/g   | 1,1306 | 4,42E-05 |
| rs7857165 | rs117432403 | 10886    | 0,496          | 1      | rs117432403                      | a/g   | 0,0184  | 3,65E-01   | rs117432403                                                     | a/g   | 1,1088 | 1,01E-02 |
| rs7857165 | rs117640468 | 15047    | 0,496          | 1      | rs117640468                      | t/c   | 0,0191  | 3,26E-01   | rs117640468                                                     | t/c   | 1,1174 | 1,64E-02 |

**eTable 3.** List of Gene Loci (Unpruned) With Conjunctive False Discovery Rate (conjFDR<.10) Associated With Schizophrenia (SCZ) and General Cognitive Function in the CHARGE Cohort (COG CHARGE), COG in the COGENT Cohort (COG COGENT), Verbal-Numerical Reasoning (VNR) or Reaction Time (RT). Loci in MHC marked with \*.

**eTable 3A. Loci with conjFDR<.10 associated with SCZ and COG CHARGE**

| Locus | SNP        | Gene    | Chr | A1 | A2 | z-score SCZ | z-score COG CHARGE | conjFDR  | prune | p SCZ    | p COG CHARGE |
|-------|------------|---------|-----|----|----|-------------|--------------------|----------|-------|----------|--------------|
| 1     | rs2782657  | HYI     | 1   | C  | G  | NaN         | NaN                | 5,26E-02 | 1     | 1,58E-03 | 2,58E-04     |
| 1     | rs3791034  | KDM4A   | 1   | G  | A  | -2,92E+00   | 3,47E+00           | 8,65E-02 | 0     | 3,45E-03 | 5,26E-04     |
| 1     | rs4660257  | KDM4A   | 1   | C  | T  | -3,07E+00   | 3,38E+00           | 9,02E-02 | 0     | 2,15E-03 | 7,29E-04     |
| 1     | rs11805774 | KDM4A   | 1   | A  | G  | -3,00E+00   | 3,44E+00           | 8,81E-02 | 0     | 2,74E-03 | 5,80E-04     |
| 1     | rs17401357 | KDM4A   | 1   | C  | G  | NaN         | NaN                | 9,93E-02 | 0     | 3,31E-03 | 5,94E-04     |
| 1     | rs3791035  | KDM4A   | 1   | C  | G  | NaN         | NaN                | 8,65E-02 | 0     | 3,10E-03 | 5,62E-04     |
| 1     | rs2270972  | KDM4A   | 1   | G  | C  | NaN         | NaN                | 9,93E-02 | 0     | 3,49E-03 | 6,17E-04     |
| 2     | rs12561796 | ANKRD45 | 1   | T  | C  | -3,60E+00   | 3,20E+00           | 8,64E-02 | 1     | 3,21E-04 | 1,40E-03     |
| 3     | rs6709302  | BCL11A  | 2   | A  | G  | 3,63E+00    | 3,26E+00           | 8,64E-02 | 1     | 2,87E-04 | 1,12E-03     |
| 4     | rs12986588 | CTNNA2  | 2   | T  | C  | 3,21E+00    | 4,19E+00           | 4,44E-02 | 0     | 1,32E-03 | 2,74E-05     |
| 4     | rs13034462 | CTNNA2  | 2   | G  | T  | 3,21E+00    | 4,20E+00           | 4,44E-02 | 0     | 1,34E-03 | 2,65E-05     |
| 4     | rs13024343 | CTNNA2  | 2   | A  | T  | NaN         | NaN                | 2,64E-02 | 1     | 6,57E-04 | 2,92E-05     |
| 4     | rs12987105 | CTNNA2  | 2   | C  | T  | 3,34E+00    | 4,16E+00           | 3,15E-02 | 0     | 8,50E-04 | 3,21E-05     |
| 5     | rs1545424  | TBC1D5  | 3   | A  | T  | NaN         | NaN                | 3,35E-02 | 1     | 1,04E-04 | 3,02E-04     |
| 5     | rs1375817  | TBC1D5  | 3   | C  | T  | -3,86E+00   | 3,48E+00           | 4,69E-02 | 0     | 1,15E-04 | 5,06E-04     |
| 6     | rs352158   | ALAS1   | 3   | C  | T  | 3,01E+00    | -3,42E+00          | 8,81E-02 | 0     | 2,62E-03 | 6,36E-04     |
| 6     | rs614288   | ALAS1   | 3   | T  | C  | 3,14E+00    | -3,52E+00          | 5,26E-02 | 0     | 1,71E-03 | 4,26E-04     |
| 6     | rs181274   | ALAS1   | 3   | T  | A  | NaN         | NaN                | 8,64E-02 | 0     | 9,42E-04 | 1,16E-03     |
| 6     | rs352167   | ALAS1   | 3   | T  | C  | 3,41E+00    | -3,28E+00          | 7,47E-02 | 0     | 6,57E-04 | 1,02E-03     |
| 6     | rs352166   | ALAS1   | 3   | C  | T  | 3,39E+00    | -3,29E+00          | 7,47E-02 | 0     | 7,09E-04 | 9,88E-04     |
| 6     | rs352165   | ALAS1   | 3   | A  | G  | 3,31E+00    | -3,25E+00          | 8,64E-02 | 0     | 9,28E-04 | 1,13E-03     |

| Locus | SNP        | Gene      | Chr | A1 | A2 | z-score SCZ | z-score COG CHARGE | conjFDR  | prune | p SCZ    | p COG CHARGE |
|-------|------------|-----------|-----|----|----|-------------|--------------------|----------|-------|----------|--------------|
| 6     | rs352163   | ALAS1     | 3   | G  | A  | 3,29E+00    | -3,57E+00          | 3,97E-02 | 0     | 1,01E-03 | 3,60E-04     |
| 6     | rs164640   | ALAS1     | 3   | C  | T  | 3,32E+00    | -3,57E+00          | 3,97E-02 | 0     | 8,86E-04 | 3,58E-04     |
| 6     | rs352162   | TLR9      | 3   | T  | C  | 3,42E+00    | -3,65E+00          | 2,81E-02 | 0     | 6,16E-04 | 2,63E-04     |
| 6     | rs352140   | TLR9      | 3   | C  | T  | 3,44E+00    | -3,67E+00          | 2,81E-02 | 0     | 5,87E-04 | 2,40E-04     |
| 6     | rs352139   | TLR9      | 3   | T  | C  | 3,54E+00    | -3,74E+00          | 2,35E-02 | 0     | 4,07E-04 | 1,85E-04     |
| 6     | rs187084   | TLR9      | 3   | G  | A  | -4,33E+00   | 3,39E+00           | 5,50E-02 | 0     | 1,47E-05 | 7,07E-04     |
| 6     | rs1060330  | WDR82     | 3   | T  | C  | 4,57E+00    | -3,65E+00          | 2,81E-02 | 0     | 4,80E-06 | 2,66E-04     |
| 6     | rs7614727  | WDR82     | 3   | C  | T  | 4,55E+00    | -3,66E+00          | 2,81E-02 | 0     | 5,40E-06 | 2,48E-04     |
| 6     | rs6445358  | WDR82     | 3   | C  | G  | NaN         | NaN                | 2,81E-02 | 0     | 4,10E-06 | 2,78E-04     |
| 6     | rs7622851  | GLYCTK1   | 3   | C  | G  | NaN         | NaN                | 3,35E-02 | 0     | 3,75E-06 | 3,51E-04     |
| 6     | rs13094687 | PHF7      | 3   | G  | A  | -3,91E+00   | 3,24E+00           | 8,64E-02 | 0     | 9,10E-05 | 1,21E-03     |
| 6     | rs2272088  | PHF7      | 3   | G  | A  | -3,86E+00   | 3,27E+00           | 7,47E-02 | 0     | 1,15E-04 | 1,09E-03     |
| 6     | rs648514   | SEMA3G    | 3   | A  | G  | 3,42E+00    | -3,45E+00          | 4,69E-02 | 0     | 6,30E-04 | 5,55E-04     |
| 6     | rs731831   | STAB1     | 3   | A  | G  | -4,15E+00   | 3,56E+00           | 3,97E-02 | 0     | 3,30E-05 | 3,69E-04     |
| 6     | rs1010553  | STAB1     | 3   | C  | T  | 4,13E+00    | -3,91E+00          | 1,33E-02 | 0     | 3,63E-05 | 9,11E-05     |
| 6     | rs1010554  | STAB1     | 3   | C  | T  | 3,93E+00    | -4,04E+00          | 7,29E-03 | 0     | 8,39E-05 | 5,38E-05     |
| 6     | rs2015971  | STAB1     | 3   | T  | C  | -3,25E+00   | 3,71E+00           | 4,44E-02 | 0     | 1,16E-03 | 2,05E-04     |
| 6     | rs13081028 | STAB1     | 3   | G  | A  | 3,65E+00    | -4,22E+00          | 1,27E-02 | 0     | 2,66E-04 | 2,39E-05     |
| 6     | rs9853056  | STAB1     | 3   | T  | C  | 3,78E+00    | -3,87E+00          | 1,33E-02 | 0     | 1,56E-04 | 1,09E-04     |
| 6     | rs13303    | STAB1     | 3   | T  | C  | 3,86E+00    | -4,26E+00          | 7,15E-03 | 0     | 1,12E-04 | 2,01E-05     |
| 6     | rs11711421 | NT5DC2    | 3   | T  | C  | -3,35E+00   | 3,71E+00           | 3,15E-02 | 0     | 8,07E-04 | 2,06E-04     |
| 6     | rs4687625  | NT5DC2    | 3   | T  | C  | -3,19E+00   | 3,67E+00           | 4,44E-02 | 0     | 1,41E-03 | 2,43E-04     |
| 6     | rs4282054  | NT5DC2    | 3   | T  | C  | 3,88E+00    | -4,29E+00          | 5,88E-03 | 1     | 1,04E-04 | 1,82E-05     |
| 6     | rs7614981  | NT5DC2    | 3   | C  | A  | 4,10E+00    | -4,12E+00          | 5,92E-03 | 0     | 4,11E-05 | 3,78E-05     |
| 6     | rs12489828 | NT5DC2    | 3   | G  | T  | 4,07E+00    | -4,07E+00          | 7,29E-03 | 0     | 4,62E-05 | 4,65E-05     |
| 6     | rs6445528  | LOC440957 | 3   | G  | A  | -3,01E+00   | 3,73E+00           | 7,34E-02 | 0     | 2,61E-03 | 1,91E-04     |



| Locus | SNP        | Gene      | Chr | A1 | A2 | z-score SCZ | z-score COG<br>CHARGE | conjFDR  | prune | p SCZ    | p COG<br>CHARGE |
|-------|------------|-----------|-----|----|----|-------------|-----------------------|----------|-------|----------|-----------------|
| 6     | rs1133415  | LOC440957 | 3   | A  | G  | -2,99E+00   | 3,73E+00              | 8,65E-02 | 0     | 2,82E-03 | 1,90E-04        |
| 6     | rs2878628  | PB1       | 3   | G  | A  | -3,75E+00   | 3,55E+00              | 3,97E-02 | 0     | 1,75E-04 | 3,81E-04        |
| 6     | rs2251219  | PB1       | 3   | C  | T  | -4,17E+00   | 3,47E+00              | 4,69E-02 | 0     | 3,06E-05 | 5,12E-04        |
| 6     | rs1961959  | PB1       | 3   | C  | G  | NaN         | NaN                   | 4,69E-02 | 0     | 4,94E-05 | 5,12E-04        |
| 6     | rs1961958  | PB1       | 3   | G  | A  | -4,08E+00   | 3,48E+00              | 4,69E-02 | 0     | 4,51E-05 | 5,07E-04        |
| 6     | rs17052259 | PB1       | 3   | G  | A  | -3,76E+00   | 3,56E+00              | 3,97E-02 | 0     | 1,68E-04 | 3,73E-04        |
| 6     | rs3796353  | PB1       | 3   | T  | C  | -3,76E+00   | 3,56E+00              | 3,97E-02 | 0     | 1,70E-04 | 3,73E-04        |
| 6     | rs6778844  | PB1       | 3   | C  | T  | -4,04E+00   | 3,48E+00              | 4,69E-02 | 0     | 5,35E-05 | 5,04E-04        |
| 6     | rs2289249  | PB1       | 3   | A  | G  | -4,06E+00   | 3,48E+00              | 4,69E-02 | 0     | 4,81E-05 | 4,98E-04        |
| 6     | rs6798246  | PB1       | 3   | A  | G  | -4,09E+00   | 3,48E+00              | 4,69E-02 | 0     | 4,25E-05 | 5,01E-04        |
| 6     | rs11714565 | PB1       | 3   | T  | C  | -3,69E+00   | 3,56E+00              | 3,97E-02 | 0     | 2,26E-04 | 3,70E-04        |
| 6     | rs6805156  | PB1       | 3   | C  | T  | -3,71E+00   | 3,56E+00              | 3,97E-02 | 0     | 2,08E-04 | 3,70E-04        |
| 6     | rs7652191  | PB1       | 3   | C  | T  | -3,73E+00   | 3,56E+00              | 3,97E-02 | 0     | 1,94E-04 | 3,71E-04        |
| 6     | rs17264436 | PB1       | 3   | A  | T  | NaN         | NaN                   | 4,69E-02 | 0     | 6,82E-05 | 5,06E-04        |
| 6     | rs4687629  | PB1       | 3   | C  | G  | NaN         | NaN                   | 3,97E-02 | 0     | 1,93E-04 | 3,73E-04        |
| 6     | rs11720159 | PB1       | 3   | G  | T  | -3,70E+00   | 3,56E+00              | 3,97E-02 | 0     | 2,17E-04 | 3,73E-04        |
| 6     | rs11720243 | PB1       | 3   | C  | T  | -3,69E+00   | 3,56E+00              | 3,97E-02 | 0     | 2,28E-04 | 3,72E-04        |
| 6     | rs12487445 | PB1       | 3   | C  | A  | -3,96E+00   | 3,48E+00              | 4,69E-02 | 0     | 7,38E-05 | 5,03E-04        |
| 6     | rs2590838  | PB1       | 3   | G  | A  | 4,66E+00    | -3,97E+00             | 1,09E-02 | 0     | 3,13E-06 | 7,22E-05        |
| 6     | rs2336146  | PB1       | 3   | G  | A  | -3,65E+00   | 3,60E+00              | 3,35E-02 | 0     | 2,59E-04 | 3,18E-04        |
| 6     | rs11714419 | PB1       | 3   | G  | A  | -4,00E+00   | 3,49E+00              | 4,69E-02 | 0     | 6,33E-05 | 4,82E-04        |
| 6     | rs2118540  | PB1       | 3   | C  | T  | -4,02E+00   | 3,51E+00              | 3,97E-02 | 0     | 5,77E-05 | 4,43E-04        |
| 6     | rs2276824  | PB1       | 3   | C  | G  | NaN         | NaN                   | 6,42E-02 | 0     | 4,48E-06 | 8,87E-04        |
| 6     | rs3774366  | PB1       | 3   | C  | T  | -3,71E+00   | 3,59E+00              | 3,35E-02 | 0     | 2,05E-04 | 3,32E-04        |
| 6     | rs3774365  | PB1       | 3   | C  | T  | -4,14E+00   | 3,52E+00              | 3,97E-02 | 0     | 3,54E-05 | 4,31E-04        |
| 6     | rs12487591 | PB1       | 3   | T  | A  | NaN         | NaN                   | 3,97E-02 | 0     | 3,53E-05 | 4,40E-04        |

| Locus | SNP        | Gene  | Chr | A1 | A2 | z-score SCZ | z-score COG<br>CHARGE | conjFDR  | prune | p SCZ    | p COG<br>CHARGE |
|-------|------------|-------|-----|----|----|-------------|-----------------------|----------|-------|----------|-----------------|
| 6     | rs3733045  | PB1   | 3   | G  | A  | -3,74E+00   | 3,58E+00              | 3,35E-02 | 0     | 1,81E-04 | 3,42E-04        |
| 6     | rs3755806  | PB1   | 3   | C  | T  | -4,14E+00   | 3,51E+00              | 4,69E-02 | 0     | 3,41E-05 | 4,52E-04        |
| 6     | rs13083798 | PB1   | 3   | A  | G  | 4,66E+00    | -4,00E+00             | 8,94E-03 | 0     | 3,12E-06 | 6,23E-05        |
| 6     | rs10510760 | PB1   | 3   | A  | G  | -4,22E+00   | 3,60E+00              | 3,35E-02 | 0     | 2,45E-05 | 3,16E-04        |
| 6     | rs13064064 | PB1   | 3   | C  | T  | -4,14E+00   | 3,51E+00              | 3,97E-02 | 0     | 3,46E-05 | 4,43E-04        |
| 6     | rs1561337  | PB1   | 3   | A  | G  | -4,15E+00   | 3,51E+00              | 3,97E-02 | 0     | 3,26E-05 | 4,44E-04        |
| 6     | rs4687548  | PB1   | 3   | T  | A  | NaN         | NaN                   | 3,97E-02 | 0     | 3,27E-05 | 4,46E-04        |
| 6     | rs2083180  | PB1   | 3   | T  | G  | -3,80E+00   | 3,64E+00              | 2,81E-02 | 0     | 1,45E-04 | 2,74E-04        |
| 6     | rs13068293 | PB1   | 3   | A  | C  | -4,15E+00   | 3,51E+00              | 3,97E-02 | 0     | 3,27E-05 | 4,42E-04        |
| 6     | rs11130312 | PB1   | 3   | C  | A  | -4,14E+00   | 3,51E+00              | 3,97E-02 | 0     | 3,45E-05 | 4,44E-04        |
| 6     | rs13085895 | PB1   | 3   | C  | G  | NaN         | NaN                   | 3,97E-02 | 0     | 4,09E-05 | 4,39E-04        |
| 6     | rs13085775 | PB1   | 3   | T  | C  | -3,72E+00   | 3,58E+00              | 3,35E-02 | 0     | 1,99E-04 | 3,50E-04        |
| 6     | rs2028216  | PB1   | 3   | T  | C  | -4,01E+00   | 3,66E+00              | 2,81E-02 | 0     | 6,05E-05 | 2,51E-04        |
| 6     | rs2289250  | PB1   | 3   | A  | C  | -4,15E+00   | 3,51E+00              | 3,97E-02 | 0     | 3,36E-05 | 4,41E-04        |
| 6     | rs2336149  | PB1   | 3   | A  | G  | -3,73E+00   | 3,57E+00              | 3,35E-02 | 0     | 1,93E-04 | 3,54E-04        |
| 6     | rs7611731  | PB1   | 3   | C  | T  | -3,73E+00   | 3,59E+00              | 3,35E-02 | 0     | 1,92E-04 | 3,25E-04        |
| 6     | rs6804145  | PB1   | 3   | T  | C  | -3,73E+00   | 3,57E+00              | 3,35E-02 | 0     | 1,95E-04 | 3,55E-04        |
| 6     | rs11130315 | PB1   | 3   | G  | A  | -4,14E+00   | 3,52E+00              | 3,97E-02 | 0     | 3,43E-05 | 4,39E-04        |
| 6     | rs6803012  | PB1   | 3   | A  | G  | -4,14E+00   | 3,49E+00              | 4,69E-02 | 0     | 3,46E-05 | 4,81E-04        |
| 6     | rs2336542  | PB1   | 3   | G  | A  | -4,15E+00   | 3,50E+00              | 4,69E-02 | 0     | 3,35E-05 | 4,65E-04        |
| 6     | rs10865973 | PBRM1 | 3   | T  | A  | NaN         | NaN                   | 4,69E-02 | 0     | 5,54E-05 | 4,66E-04        |
| 6     | rs10865974 | PBRM1 | 3   | T  | G  | -3,74E+00   | 3,55E+00              | 3,97E-02 | 0     | 1,87E-04 | 3,89E-04        |
| 6     | rs1866268  | PBRM1 | 3   | A  | C  | -3,73E+00   | 3,55E+00              | 3,97E-02 | 0     | 1,93E-04 | 3,89E-04        |
| 6     | rs1108842  | GNL3  | 3   | A  | C  | 4,66E+00    | -3,93E+00             | 1,09E-02 | 0     | 3,09E-06 | 8,58E-05        |
| 6     | rs11177    | GNL3  | 3   | A  | G  | -4,00E+00   | 3,48E+00              | 4,69E-02 | 0     | 6,22E-05 | 5,00E-04        |
| 6     | rs6762813  | GNL3  | 3   | T  | C  | -4,00E+00   | 3,50E+00              | 4,69E-02 | 0     | 6,38E-05 | 4,65E-04        |

| Locus | SNP        | Gene   | Chr | A1 | A2 | z-score SCZ | z-score COG<br>CHARGE | conjFDR  | prune | p SCZ    | p COG<br>CHARGE |
|-------|------------|--------|-----|----|----|-------------|-----------------------|----------|-------|----------|-----------------|
| 6     | rs2289247  | GNL3   | 3   | A  | G  | -3,74E+00   | 3,55E+00              | 3,97E-02 | 0     | 1,85E-04 | 3,79E-04        |
| 6     | rs6976     | GLT8D1 | 3   | T  | C  | -4,00E+00   | 3,50E+00              | 4,69E-02 | 0     | 6,37E-05 | 4,60E-04        |
| 6     | rs2164885  | GLT8D1 | 3   | C  | T  | -3,66E+00   | 3,56E+00              | 3,97E-02 | 0     | 2,56E-04 | 3,67E-04        |
| 6     | rs3733041  | GLT8D1 | 3   | C  | T  | -3,70E+00   | 3,55E+00              | 3,97E-02 | 0     | 2,20E-04 | 3,92E-04        |
| 6     | rs12635140 | GLT8D1 | 3   | C  | T  | -3,69E+00   | 3,56E+00              | 3,97E-02 | 0     | 2,24E-04 | 3,74E-04        |
| 6     | rs6617     | SPCS1  | 3   | G  | C  | NaN         | NaN                   | 1,95E-02 | 0     | 2,33E-04 | 1,76E-04        |
| 6     | rs3755798  | SPCS1  | 3   | A  | G  | -3,69E+00   | 3,53E+00              | 3,97E-02 | 0     | 2,21E-04 | 4,13E-04        |
| 6     | rs6445534  | SPCS1  | 3   | A  | G  | -3,69E+00   | 3,53E+00              | 3,97E-02 | 0     | 2,20E-04 | 4,13E-04        |
| 6     | rs13079063 | NEK4   | 3   | G  | A  | -3,71E+00   | 3,54E+00              | 3,97E-02 | 0     | 2,05E-04 | 4,07E-04        |
| 6     | rs11235    | NEK4   | 3   | C  | T  | 4,57E+00    | -3,27E+00             | 7,47E-02 | 0     | 4,80E-06 | 1,07E-03        |
| 6     | rs2268027  | NEK4   | 3   | A  | G  | -3,99E+00   | 3,48E+00              | 4,69E-02 | 0     | 6,48E-05 | 4,97E-04        |
| 6     | rs11130323 | NEK4   | 3   | C  | T  | -4,14E+00   | 3,47E+00              | 4,69E-02 | 0     | 3,45E-05 | 5,13E-04        |
| 6     | rs2268026  | NEK4   | 3   | C  | T  | -4,13E+00   | 3,47E+00              | 4,69E-02 | 0     | 3,68E-05 | 5,25E-04        |
| 6     | rs2072390  | NEK4   | 3   | T  | A  | NaN         | NaN                   | 3,97E-02 | 0     | 1,97E-04 | 4,30E-04        |
| 6     | rs13082208 | NEK4   | 3   | G  | T  | -3,98E+00   | 3,39E+00              | 5,50E-02 | 0     | 6,92E-05 | 7,00E-04        |
| 6     | rs13082960 | NEK4   | 3   | C  | A  | -4,16E+00   | 3,45E+00              | 5,50E-02 | 0     | 3,22E-05 | 5,70E-04        |
| 6     | rs2336545  | NEK4   | 3   | C  | T  | -4,16E+00   | 3,40E+00              | 5,50E-02 | 0     | 3,19E-05 | 6,64E-04        |
| 6     | rs12497998 | NEK4   | 3   | T  | C  | -3,80E+00   | 3,47E+00              | 4,69E-02 | 0     | 1,47E-04 | 5,14E-04        |
| 6     | rs2268025  | NEK4   | 3   | T  | A  | NaN         | NaN                   | 5,50E-02 | 0     | 4,79E-05 | 6,88E-04        |
| 6     | rs1029871  | NEK4   | 3   | C  | G  | NaN         | NaN                   | 5,50E-02 | 0     | 4,54E-05 | 6,54E-04        |
| 6     | rs998909   | NEK4   | 3   | G  | A  | -3,89E+00   | 3,29E+00              | 7,47E-02 | 0     | 1,01E-04 | 9,93E-04        |
| 6     | rs11717836 | NEK4   | 3   | G  | A  | -4,13E+00   | 3,47E+00              | 4,69E-02 | 0     | 3,70E-05 | 5,12E-04        |
| 6     | rs2019065  | ITIH1  | 3   | C  | T  | -4,00E+00   | 3,52E+00              | 3,97E-02 | 0     | 6,29E-05 | 4,25E-04        |
| 6     | rs2710323  | ITIH1  | 3   | T  | C  | 5,12E+00    | -3,93E+00             | 1,09E-02 | 0     | 3,14E-07 | 8,47E-05        |
| 6     | rs3774354  | ITIH1  | 3   | A  | G  | -4,10E+00   | 3,49E+00              | 4,69E-02 | 0     | 4,18E-05 | 4,76E-04        |
| 6     | rs3774355  | ITIH1  | 3   | A  | G  | -4,07E+00   | 3,48E+00              | 4,69E-02 | 0     | 4,74E-05 | 4,94E-04        |

| Locus | SNP        | Gene     | Chr | A1 | A2 | z-score SCZ | z-score COG<br>CHARGE | conjFDR  | prune | p SCZ    | p COG<br>CHARGE |
|-------|------------|----------|-----|----|----|-------------|-----------------------|----------|-------|----------|-----------------|
| 6     | rs2239551  | ITIH1    | 3   | A  | G  | -4,00E+00   | 3,49E+00              | 4,69E-02 | 0     | 6,32E-05 | 4,78E-04        |
| 6     | rs2268023  | ITIH1    | 3   | A  | T  | NaN         | NaN                   | 8,64E-02 | 0     | 2,03E-04 | 1,30E-03        |
| 6     | rs678      | ITIH1    | 3   | T  | A  | NaN         | NaN                   | 6,42E-02 | 0     | 3,92E-05 | 7,34E-04        |
| 6     | rs1042779  | ITIH1    | 3   | G  | A  | -4,19E+00   | 3,34E+00              | 6,42E-02 | 0     | 2,79E-05 | 8,45E-04        |
| 6     | rs2286798  | ITIH1    | 3   | C  | A  | -4,10E+00   | 3,36E+00              | 6,42E-02 | 0     | 4,11E-05 | 7,78E-04        |
| 6     | rs2300149  | ITIH1    | 3   | T  | C  | -3,99E+00   | 3,50E+00              | 4,69E-02 | 0     | 6,49E-05 | 4,70E-04        |
| 6     | rs2239549  | ITIH1    | 3   | A  | G  | -4,06E+00   | 3,37E+00              | 6,42E-02 | 0     | 4,83E-05 | 7,45E-04        |
| 6     | rs2240919  | ITIH3    | 3   | G  | C  | NaN         | NaN                   | 2,35E-02 | 0     | 3,51E-05 | 2,16E-04        |
| 6     | rs2535629  | ITIH3    | 3   | A  | G  | -4,59E+00   | 3,35E+00              | 6,42E-02 | 0     | 4,46E-06 | 8,13E-04        |
| 6     | rs3617     | ITIH3    | 3   | A  | C  | -5,27E+00   | 3,92E+00              | 1,09E-02 | 0     | 1,38E-07 | 8,84E-05        |
| 6     | rs736408   | ITIH3    | 3   | T  | C  | -4,37E+00   | 3,26E+00              | 7,47E-02 | 0     | 1,21E-05 | 1,10E-03        |
| 6     | rs4481150  | ITIH3    | 3   | T  | C  | 5,26E+00    | -3,92E+00             | 1,33E-02 | 0     | 1,42E-07 | 8,94E-05        |
| 6     | rs2535627  | AX746575 | 3   | T  | C  | 5,31E+00    | -3,95E+00             | 1,09E-02 | 0     | 1,09E-07 | 7,93E-05        |
| 6     | rs2071044  | ITIH4    | 3   | C  | T  | 5,18E+00    | -3,93E+00             | 1,09E-02 | 0     | 2,23E-07 | 8,33E-05        |
| 6     | rs6445541  | TMEM110  | 3   | T  | G  | -4,78E+00   | 3,30E+00              | 7,47E-02 | 0     | 1,79E-06 | 9,66E-04        |
| 6     | rs4687672  | TMEM110  | 3   | A  | G  | -4,48E+00   | 3,22E+00              | 8,64E-02 | 0     | 7,48E-06 | 1,29E-03        |
| 6     | rs2276825  | TMEM110  | 3   | C  | T  | -4,35E+00   | 3,44E+00              | 5,50E-02 | 0     | 1,38E-05 | 5,79E-04        |
| 6     | rs9682464  | TMEM110  | 3   | T  | C  | -4,36E+00   | 3,43E+00              | 5,50E-02 | 0     | 1,30E-05 | 5,94E-04        |
| 6     | rs4302374  | TMEM110  | 3   | C  | T  | -4,23E+00   | 3,40E+00              | 5,50E-02 | 0     | 2,33E-05 | 6,80E-04        |
| 6     | rs6445547  | TMEM110  | 3   | C  | T  | -4,19E+00   | 3,41E+00              | 5,50E-02 | 0     | 2,73E-05 | 6,59E-04        |
| 6     | rs12492391 | TMEM110  | 3   | A  | C  | -4,70E+00   | 3,25E+00              | 8,64E-02 | 0     | 2,66E-06 | 1,16E-03        |
| 6     | rs9876403  | TMEM110  | 3   | T  | C  | -3,99E+00   | 3,34E+00              | 6,42E-02 | 0     | 6,71E-05 | 8,40E-04        |
| 6     | rs9880978  | TMEM110  | 3   | G  | C  | NaN         | NaN                   | 8,64E-02 | 0     | 3,93E-06 | 1,23E-03        |
| 6     | rs9844736  | TMEM110  | 3   | T  | G  | -4,03E+00   | 3,20E+00              | 8,64E-02 | 0     | 5,64E-05 | 1,35E-03        |
| 6     | rs1134546  | SFMBT1   | 3   | G  | A  | -3,72E+00   | 3,19E+00              | 9,95E-02 | 0     | 2,00E-04 | 1,42E-03        |
| 6     | rs2581810  | SFMBT1   | 3   | C  | T  | -3,93E+00   | 3,28E+00              | 7,47E-02 | 0     | 8,33E-05 | 1,03E-03        |

| Locus | SNP        | Gene   | Chr | A1 | A2 | z-score SCZ | z-score COG CHARGE | conjFDR  | prune | p SCZ    | p COG CHARGE |
|-------|------------|--------|-----|----|----|-------------|--------------------|----------|-------|----------|--------------|
| 6     | rs2257216  | SFMBT1 | 3   | T  | C  | -5,15E+00   | 3,78E+00           | 1,95E-02 | 0     | 2,62E-07 | 1,60E-04     |
| 6     | rs2710314  | SFMBT1 | 3   | T  | C  | -5,17E+00   | 3,78E+00           | 1,95E-02 | 0     | 2,38E-07 | 1,55E-04     |
| 6     | rs2581801  | SFMBT1 | 3   | G  | T  | -3,96E+00   | 3,40E+00           | 5,50E-02 | 0     | 7,37E-05 | 6,81E-04     |
| 6     | rs2581815  | SFMBT1 | 3   | G  | C  | NaN         | NaN                | 5,50E-02 | 0     | 1,01E-04 | 6,95E-04     |
| 6     | rs7648514  | SFMBT1 | 3   | G  | C  | NaN         | NaN                | 5,50E-02 | 0     | 7,31E-05 | 6,90E-04     |
| 6     | rs6445550  | SFMBT1 | 3   | A  | G  | -3,98E+00   | 3,39E+00           | 5,50E-02 | 0     | 6,99E-05 | 6,92E-04     |
| 6     | rs9865094  | SFMBT1 | 3   | G  | C  | NaN         | NaN                | 6,42E-02 | 0     | 1,07E-04 | 8,29E-04     |
| 6     | rs9311485  | SFMBT1 | 3   | T  | G  | -3,91E+00   | 3,35E+00           | 6,42E-02 | 0     | 9,20E-05 | 8,13E-04     |
| 6     | rs2336669  | SFMBT1 | 3   | G  | A  | -4,14E+00   | 3,38E+00           | 6,42E-02 | 0     | 3,52E-05 | 7,22E-04     |
| 6     | rs4519686  | SFMBT1 | 3   | T  | C  | -3,92E+00   | 3,39E+00           | 5,50E-02 | 0     | 9,02E-05 | 6,91E-04     |
| 6     | rs2336670  | SFMBT1 | 3   | T  | G  | -5,08E+00   | 3,72E+00           | 2,35E-02 | 0     | 3,79E-07 | 2,01E-04     |
| 6     | rs9823697  | SFMBT1 | 3   | G  | A  | -5,07E+00   | 3,60E+00           | 3,35E-02 | 0     | 3,91E-07 | 3,13E-04     |
| 6     | rs2245424  | SFMBT1 | 3   | G  | C  | NaN         | NaN                | 2,35E-02 | 0     | 3,72E-07 | 1,91E-04     |
| 6     | rs6792578  | SFMBT1 | 3   | A  | G  | -3,93E+00   | 3,40E+00           | 5,50E-02 | 0     | 8,61E-05 | 6,67E-04     |
| 6     | rs6768844  | SFMBT1 | 3   | T  | C  | -3,91E+00   | 3,40E+00           | 5,50E-02 | 0     | 9,28E-05 | 6,80E-04     |
| 6     | rs6771610  | SFMBT1 | 3   | C  | T  | -3,89E+00   | 3,23E+00           | 8,64E-02 | 0     | 9,99E-05 | 1,24E-03     |
| 6     | rs2246556  | SFMBT1 | 3   | T  | C  | -4,56E+00   | 3,13E+00           | 9,95E-02 | 0     | 5,02E-06 | 1,77E-03     |
| 6     | rs2564947  | SFMBT1 | 3   | C  | T  | -3,79E+00   | 3,25E+00           | 8,64E-02 | 0     | 1,48E-04 | 1,17E-03     |
| 6     | rs2581780  | SFMBT1 | 3   | C  | T  | -3,80E+00   | 3,28E+00           | 7,47E-02 | 0     | 1,44E-04 | 1,05E-03     |
| 6     | rs17304995 | SFMBT1 | 3   | G  | A  | -4,09E+00   | 3,14E+00           | 9,95E-02 | 0     | 4,25E-05 | 1,70E-03     |
| 6     | rs11915851 | SFMBT1 | 3   | A  | G  | -4,99E+00   | 3,58E+00           | 3,35E-02 | 0     | 5,97E-07 | 3,38E-04     |
| 6     | rs6794389  | SFMBT1 | 3   | G  | A  | -3,95E+00   | 3,28E+00           | 7,47E-02 | 0     | 7,92E-05 | 1,06E-03     |
| 6     | rs6789219  | SFMBT1 | 3   | G  | C  | NaN         | NaN                | 7,47E-02 | 0     | 7,22E-05 | 9,03E-04     |
| 7     | rs11707890 | HFKHLB | 3   | G  | T  | -3,84E+00   | 3,43E+00           | 5,50E-02 | 0     | 1,21E-04 | 5,94E-04     |
| 7     | rs7632921  | FOXP1  | 3   | T  | G  | -4,06E+00   | 3,51E+00           | 3,97E-02 | 0     | 4,89E-05 | 4,45E-04     |
| 7     | rs11720523 | FOXP1  | 3   | A  | C  | -4,01E+00   | 3,51E+00           | 4,69E-02 | 0     | 6,17E-05 | 4,48E-04     |

| Locus | SNP        | Gene  | Chr | A1 | A2 | z-score SCZ | z-score COG<br>CHARGE | conjFDR  | prune | p SCZ    | p COG<br>CHARGE |
|-------|------------|-------|-----|----|----|-------------|-----------------------|----------|-------|----------|-----------------|
| 7     | rs6779258  | FOXP1 | 3   | C  | T  | -4,03E+00   | 3,46E+00              | 4,69E-02 | 0     | 5,50E-05 | 5,49E-04        |
| 7     | rs1392226  | FOXP1 | 3   | A  | G  | -3,98E+00   | 3,53E+00              | 3,97E-02 | 0     | 7,01E-05 | 4,23E-04        |
| 7     | rs9837383  | FOXP1 | 3   | C  | T  | -3,99E+00   | 3,57E+00              | 3,97E-02 | 0     | 6,63E-05 | 3,59E-04        |
| 7     | rs9842406  | FOXP1 | 3   | G  | T  | -4,08E+00   | 3,58E+00              | 3,35E-02 | 1     | 4,58E-05 | 3,49E-04        |
| 7     | rs6780776  | FOXP1 | 3   | T  | C  | -4,03E+00   | 3,50E+00              | 4,69E-02 | 0     | 5,62E-05 | 4,59E-04        |
| 7     | rs17662328 | FOXP1 | 3   | A  | G  | -4,09E+00   | 3,51E+00              | 4,69E-02 | 0     | 4,25E-05 | 4,47E-04        |
| 7     | rs1432611  | FOXP1 | 3   | T  | G  | -4,09E+00   | 3,49E+00              | 4,69E-02 | 0     | 4,27E-05 | 4,91E-04        |
| 7     | rs6803008  | FOXP1 | 3   | T  | C  | -4,12E+00   | 3,46E+00              | 4,69E-02 | 0     | 3,75E-05 | 5,36E-04        |
| 7     | rs6778026  | FOXP1 | 3   | A  | G  | -4,07E+00   | 3,47E+00              | 4,69E-02 | 0     | 4,60E-05 | 5,20E-04        |
| 7     | rs1499895  | FOXP1 | 3   | C  | T  | -3,98E+00   | 3,46E+00              | 4,69E-02 | 0     | 7,03E-05 | 5,33E-04        |
| 7     | rs1499894  | FOXP1 | 3   | T  | C  | -4,11E+00   | 3,44E+00              | 5,50E-02 | 0     | 3,91E-05 | 5,72E-04        |
| 7     | rs7649993  | FOXP1 | 3   | G  | C  | NaN         | NaN                   | 5,50E-02 | 0     | 5,62E-05 | 6,51E-04        |
| 7     | rs6764416  | FOXP1 | 3   | T  | C  | -4,02E+00   | 3,43E+00              | 5,50E-02 | 0     | 5,78E-05 | 6,01E-04        |
| 7     | rs7624274  | FOXP1 | 3   | A  | T  | NaN         | NaN                   | 5,50E-02 | 0     | 6,43E-05 | 6,90E-04        |
| 7     | rs7610856  | FOXP1 | 3   | A  | C  | -4,01E+00   | 3,48E+00              | 4,69E-02 | 0     | 6,09E-05 | 5,06E-04        |
| 8     | rs4543205  | NDST3 | 4   | C  | A  | 3,20E+00    | -4,46E+00             | 4,44E-02 | 0     | 1,38E-03 | 8,30E-06        |
| 8     | rs6848399  | NDST3 | 4   | T  | C  | 3,08E+00    | -4,47E+00             | 6,22E-02 | 0     | 2,10E-03 | 7,90E-06        |
| 8     | rs4487434  | NDST3 | 4   | G  | A  | 3,10E+00    | -4,48E+00             | 6,22E-02 | 0     | 1,94E-03 | 7,41E-06        |
| 8     | rs4560487  | NDST3 | 4   | G  | A  | 3,14E+00    | -4,51E+00             | 5,26E-02 | 0     | 1,69E-03 | 6,63E-06        |
| 8     | rs7680858  | NDST3 | 4   | G  | A  | 3,29E+00    | -4,49E+00             | 3,74E-02 | 0     | 1,00E-03 | 7,01E-06        |
| 8     | rs10461154 | NDST3 | 4   | T  | C  | 3,17E+00    | -4,50E+00             | 5,26E-02 | 0     | 1,52E-03 | 6,93E-06        |
| 8     | rs7673016  | NDST3 | 4   | G  | A  | 3,22E+00    | -4,41E+00             | 4,44E-02 | 0     | 1,28E-03 | 1,05E-05        |
| 8     | rs6834344  | NDST3 | 4   | A  | G  | 3,16E+00    | -4,51E+00             | 5,26E-02 | 0     | 1,57E-03 | 6,63E-06        |
| 8     | rs936891   | NDST3 | 4   | A  | G  | 3,22E+00    | -4,49E+00             | 4,44E-02 | 0     | 1,27E-03 | 7,29E-06        |
| 8     | rs1319937  | NDST3 | 4   | G  | C  | NaN         | NaN                   | 6,22E-02 | 0     | 2,00E-03 | 6,04E-06        |
| 8     | rs11098412 | NDST3 | 4   | C  | A  | 3,10E+00    | -4,52E+00             | 6,22E-02 | 0     | 1,94E-03 | 6,31E-06        |

| Locus | SNP        | Gene  | Chr | A1 | A2 | z-score SCZ | z-score COG CHARGE | conjFDR  | prune | p SCZ    | p COG CHARGE |
|-------|------------|-------|-----|----|----|-------------|--------------------|----------|-------|----------|--------------|
| 8     | rs6534066  | NDST3 | 4   | G  | A  | 3,10E+00    | -4,07E+00          | 6,22E-02 | 0     | 1,94E-03 | 4,68E-05     |
| 8     | rs6534067  | NDST3 | 4   | G  | C  | NaN         | NaN                | 3,15E-02 | 0     | 7,51E-04 | 4,96E-06     |
| 8     | rs11940384 | NDST3 | 4   | A  | T  | NaN         | NaN                | 5,26E-02 | 0     | 1,71E-03 | 5,46E-06     |
| 8     | rs6856081  | NDST3 | 4   | G  | A  | 3,39E+00    | -4,59E+00          | 2,64E-02 | 0     | 6,93E-04 | 4,48E-06     |
| 8     | rs6838122  | NDST3 | 4   | T  | C  | 3,37E+00    | -4,58E+00          | 3,15E-02 | 0     | 7,61E-04 | 4,69E-06     |
| 8     | rs6838310  | NDST3 | 4   | T  | C  | 3,42E+00    | -4,59E+00          | 2,64E-02 | 0     | 6,23E-04 | 4,43E-06     |
| 8     | rs2389474  | NDST3 | 4   | A  | G  | 3,22E+00    | -4,56E+00          | 4,44E-02 | 0     | 1,26E-03 | 5,03E-06     |
| 8     | rs4834648  | NDST3 | 4   | T  | C  | 3,19E+00    | -4,45E+00          | 4,44E-02 | 0     | 1,41E-03 | 8,51E-06     |
| 8     | rs6816919  | NDST3 | 4   | T  | C  | 3,19E+00    | -4,54E+00          | 5,26E-02 | 0     | 1,43E-03 | 5,50E-06     |
| 8     | rs11098414 | NDST3 | 4   | T  | G  | 3,41E+00    | -4,58E+00          | 2,64E-02 | 0     | 6,46E-04 | 4,62E-06     |
| 8     | rs10031942 | NDST3 | 4   | T  | C  | 3,21E+00    | -4,55E+00          | 4,44E-02 | 0     | 1,34E-03 | 5,36E-06     |
| 8     | rs6534071  | NDST3 | 4   | C  | A  | 3,21E+00    | -4,55E+00          | 4,44E-02 | 0     | 1,33E-03 | 5,41E-06     |
| 8     | rs11098416 | NDST3 | 4   | G  | A  | 3,44E+00    | -4,58E+00          | 2,64E-02 | 0     | 5,84E-04 | 4,75E-06     |
| 8     | rs2892782  | NDST3 | 4   | C  | T  | 3,20E+00    | -4,52E+00          | 4,44E-02 | 0     | 1,38E-03 | 6,31E-06     |
| 8     | rs7684262  | NDST3 | 4   | T  | G  | 3,20E+00    | -4,31E+00          | 4,44E-02 | 0     | 1,38E-03 | 1,62E-05     |
| 8     | rs6847160  | NDST3 | 4   | T  | A  | NaN         | NaN                | 4,44E-02 | 0     | 1,26E-03 | 7,84E-06     |
| 8     | rs2389471  | NDST3 | 4   | T  | C  | 3,19E+00    | -4,46E+00          | 5,26E-02 | 0     | 1,42E-03 | 8,23E-06     |
| 8     | rs2389470  | NDST3 | 4   | T  | A  | NaN         | NaN                | 4,44E-02 | 0     | 1,25E-03 | 8,94E-06     |
| 8     | rs13113939 | NDST3 | 4   | G  | A  | 3,42E+00    | -4,47E+00          | 2,64E-02 | 0     | 6,26E-04 | 7,92E-06     |
| 8     | rs2389467  | NDST3 | 4   | G  | T  | 3,35E+00    | -4,46E+00          | 3,15E-02 | 0     | 8,06E-04 | 8,04E-06     |
| 8     | rs11936756 | NDST3 | 4   | G  | A  | 3,11E+00    | -4,45E+00          | 6,22E-02 | 0     | 1,85E-03 | 8,70E-06     |
| 8     | rs12108300 | NDST3 | 4   | T  | C  | 3,27E+00    | -4,46E+00          | 3,74E-02 | 0     | 1,06E-03 | 8,35E-06     |
| 8     | rs6841411  | NDST3 | 4   | T  | C  | 3,13E+00    | -4,42E+00          | 5,26E-02 | 0     | 1,77E-03 | 1,00E-05     |
| 8     | rs4498201  | NDST3 | 4   | T  | C  | 3,33E+00    | -4,44E+00          | 3,15E-02 | 0     | 8,56E-04 | 8,95E-06     |
| 8     | rs2389464  | NDST3 | 4   | A  | G  | 3,38E+00    | -4,45E+00          | 3,15E-02 | 0     | 7,26E-04 | 8,52E-06     |
| 8     | rs2389463  | NDST3 | 4   | A  | C  | 3,42E+00    | -4,49E+00          | 2,64E-02 | 0     | 6,37E-04 | 7,14E-06     |

| Locus | SNP        | Gene   | Chr | A1 | A2 | z-score SCZ | z-score COG CHARGE | conjFDR  | prune | p SCZ    | p COG CHARGE |
|-------|------------|--------|-----|----|----|-------------|--------------------|----------|-------|----------|--------------|
| 8     | rs4833557  | NDST3  | 4   | A  | G  | 3,42E+00    | -4,36E+00          | 2,64E-02 | 0     | 6,21E-04 | 1,30E-05     |
| 8     | rs4833558  | NDST3  | 4   | C  | T  | 3,48E+00    | -4,45E+00          | 2,21E-02 | 1     | 4,98E-04 | 8,42E-06     |
| 8     | rs4590118  | NDST3  | 4   | T  | G  | 3,40E+00    | -3,93E+00          | 2,64E-02 | 0     | 6,74E-04 | 8,37E-05     |
| 8     | rs12507486 | NDST3  | 4   | T  | C  | 3,42E+00    | -4,47E+00          | 2,64E-02 | 0     | 6,22E-04 | 7,82E-06     |
| 8     | rs6534073  | NDST3  | 4   | T  | A  | NaN         | NaN                | 2,64E-02 | 0     | 6,77E-04 | 6,78E-06     |
| 8     | rs2892779  | NDST3  | 4   | A  | C  | 3,19E+00    | -4,49E+00          | 4,44E-02 | 0     | 1,41E-03 | 7,07E-06     |
| 9     | rs159369   | SMIM15 | 5   | A  | G  | 3,57E+00    | -3,28E+00          | 7,47E-02 | 0     | 3,57E-04 | 1,04E-03     |
| 9     | rs159366   | SMIM15 | 5   | T  | C  | 3,44E+00    | -3,21E+00          | 8,64E-02 | 0     | 5,74E-04 | 1,34E-03     |
| 9     | rs34618    | SMIM15 | 5   | A  | C  | 3,48E+00    | -3,20E+00          | 8,64E-02 | 0     | 4,97E-04 | 1,40E-03     |
| 9     | rs159363   | SMIM15 | 5   | A  | G  | 3,71E+00    | -3,17E+00          | 9,95E-02 | 0     | 2,08E-04 | 1,54E-03     |
| 9     | rs159361   | SMIM15 | 5   | T  | C  | 3,49E+00    | -3,19E+00          | 8,64E-02 | 0     | 4,80E-04 | 1,41E-03     |
| 9     | rs40506    | SMIM15 | 5   | T  | C  | 5,21E+00    | -3,28E+00          | 7,47E-02 | 0     | 1,90E-07 | 1,06E-03     |
| 9     | rs34628    | SMIM15 | 5   | C  | A  | 3,47E+00    | -3,21E+00          | 8,64E-02 | 0     | 5,22E-04 | 1,33E-03     |
| 9     | rs34627    | SMIM15 | 5   | G  | A  | 5,22E+00    | -3,27E+00          | 7,47E-02 | 0     | 1,76E-07 | 1,08E-03     |
| 9     | rs159360   | SMIM15 | 5   | C  | A  | 5,25E+00    | -3,27E+00          | 7,47E-02 | 0     | 1,53E-07 | 1,08E-03     |
| 9     | rs2055375  | SMIM15 | 5   | T  | G  | 5,26E+00    | -3,27E+00          | 7,47E-02 | 0     | 1,47E-07 | 1,09E-03     |
| 9     | rs7443733  | SMIM15 | 5   | T  | C  | 5,21E+00    | -3,28E+00          | 7,47E-02 | 0     | 1,92E-07 | 1,05E-03     |
| 9     | rs7444594  | SMIM15 | 5   | T  | G  | 5,27E+00    | -3,29E+00          | 7,47E-02 | 0     | 1,35E-07 | 1,01E-03     |
| 9     | rs12516321 | ZSWIM6 | 5   | G  | A  | 3,58E+00    | -3,17E+00          | 9,95E-02 | 0     | 3,38E-04 | 1,51E-03     |
| 9     | rs6868457  | ZSWIM6 | 5   | T  | C  | 5,36E+00    | -3,34E+00          | 6,42E-02 | 0     | 8,17E-08 | 8,37E-04     |
| 9     | rs12523278 | ZSWIM6 | 5   | A  | G  | 5,32E+00    | -3,28E+00          | 7,47E-02 | 0     | 1,04E-07 | 1,06E-03     |
| 9     | rs4352559  | ZSWIM6 | 5   | C  | T  | 5,46E+00    | -3,50E+00          | 4,69E-02 | 0     | 4,65E-08 | 4,69E-04     |
| 9     | rs4546329  | ZSWIM6 | 5   | T  | C  | 5,76E+00    | -3,70E+00          | 2,35E-02 | 0     | 8,32E-09 | 2,16E-04     |
| 9     | rs4391122  | ZSWIM6 | 5   | G  | A  | 5,89E+00    | -3,86E+00          | 1,62E-02 | 1     | 3,92E-09 | 1,13E-04     |
| 9     | rs7701440  | ZSWIM6 | 5   | C  | T  | 5,73E+00    | -3,65E+00          | 2,81E-02 | 0     | 1,02E-08 | 2,66E-04     |
| 9     | rs4700418  | ZSWIM6 | 5   | G  | C  | NaN         | NaN                | 2,81E-02 | 0     | 7,14E-08 | 2,36E-04     |



| Locus | SNP        | Gene   | Chr | A1 | A2 | z-score SCZ | z-score COG CHARGE | conjFDR  | prune | p SCZ    | p COG CHARGE |
|-------|------------|--------|-----|----|----|-------------|--------------------|----------|-------|----------|--------------|
| 9     | rs6449528  | ZSWIM6 | 5   | A  | G  | 5,64E+00    | -3,67E+00          | 2,81E-02 | 0     | 1,67E-08 | 2,40E-04     |
| 9     | rs4604142  | ZSWIM6 | 5   | T  | C  | 5,63E+00    | -3,78E+00          | 1,95E-02 | 0     | 1,79E-08 | 1,57E-04     |
| 9     | rs7724551  | ZSWIM6 | 5   | A  | G  | 5,56E+00    | -3,71E+00          | 2,35E-02 | 0     | 2,72E-08 | 2,07E-04     |
| 9     | rs13169711 | ZSWIM6 | 5   | A  | G  | 5,46E+00    | -3,65E+00          | 2,81E-02 | 0     | 4,69E-08 | 2,60E-04     |
| 9     | rs7734879  | ZSWIM6 | 5   | A  | C  | 4,17E+00    | -3,26E+00          | 8,64E-02 | 0     | 2,99E-05 | 1,13E-03     |
| 9     | rs6449531  | ZSWIM6 | 5   | A  | G  | 4,19E+00    | -3,26E+00          | 8,64E-02 | 0     | 2,75E-05 | 1,12E-03     |
| 9     | rs6449532  | ZSWIM6 | 5   | T  | C  | 4,12E+00    | -3,26E+00          | 7,47E-02 | 0     | 3,75E-05 | 1,11E-03     |
| 9     | rs6894675  | ZSWIM6 | 5   | C  | G  | NaN         | NaN                | 8,64E-02 | 0     | 3,77E-05 | 1,14E-03     |
| 9     | rs6449533  | ZSWIM6 | 5   | C  | T  | 4,24E+00    | -3,20E+00          | 8,64E-02 | 0     | 2,26E-05 | 1,37E-03     |
| 9     | rs10939902 | ZSWIM6 | 5   | C  | T  | 5,56E+00    | -3,37E+00          | 6,42E-02 | 0     | 2,65E-08 | 7,43E-04     |
| 9     | rs6885005  | ZSWIM6 | 5   | A  | T  | NaN         | NaN                | 8,64E-02 | 0     | 3,58E-05 | 1,19E-03     |
| 9     | rs7709645  | ZSWIM6 | 5   | C  | G  | NaN         | NaN                | 4,69E-02 | 0     | 2,50E-08 | 4,80E-04     |
| 9     | rs7714712  | ZSWIM6 | 5   | A  | C  | 4,08E+00    | -3,27E+00          | 7,47E-02 | 0     | 4,46E-05 | 1,09E-03     |
| 9     | rs7720894  | ZSWIM6 | 5   | C  | G  | NaN         | NaN                | 6,42E-02 | 0     | 4,32E-07 | 7,77E-04     |
| 10    | rs12521503 | SSBP2  | 5   | T  | C  | 3,52E+00    | 3,61E+00           | 3,35E-02 | 1     | 4,32E-04 | 3,09E-04     |
| 10    | rs458430   | SSBP2  | 5   | C  | T  | 3,12E+00    | 3,66E+00           | 6,22E-02 | 0     | 1,82E-03 | 2,54E-04     |
| 10    | rs378482   | SSBP2  | 5   | C  | T  | 3,47E+00    | 3,62E+00           | 3,35E-02 | 0     | 5,24E-04 | 2,92E-04     |
| 10    | rs401996   | SSBP2  | 5   | T  | C  | 3,39E+00    | 3,27E+00           | 7,47E-02 | 0     | 6,92E-04 | 1,06E-03     |
| 10    | rs384075   | SSBP2  | 5   | G  | T  | 3,39E+00    | 3,26E+00           | 8,64E-02 | 0     | 7,11E-04 | 1,13E-03     |
| 10    | rs391229   | SSBP2  | 5   | G  | A  | 3,36E+00    | 3,37E+00           | 6,42E-02 | 0     | 7,79E-04 | 7,55E-04     |
| 10    | rs456778   | SSBP2  | 5   | A  | C  | 3,20E+00    | 3,41E+00           | 6,18E-02 | 0     | 1,39E-03 | 6,39E-04     |
| 10    | rs463247   | SSBP2  | 5   | A  | C  | 3,19E+00    | 3,41E+00           | 6,95E-02 | 0     | 1,41E-03 | 6,49E-04     |
| 10    | rs457700   | SSBP2  | 5   | A  | T  | NaN         | NaN                | 6,18E-02 | 0     | 1,36E-03 | 6,88E-04     |
| 10    | rs386424   | SSBP2  | 5   | G  | T  | 3,18E+00    | 3,41E+00           | 6,95E-02 | 0     | 1,49E-03 | 6,41E-04     |
| 10    | rs462122   | SSBP2  | 5   | A  | G  | 3,18E+00    | 3,49E+00           | 5,97E-02 | 0     | 1,47E-03 | 4,87E-04     |
| 11    | rs6914964  | SRF    | 6   | G  | A  | -3,06E+00   | 3,39E+00           | 7,82E-02 | 0     | 2,19E-03 | 6,97E-04     |

| Locus | SNP        | Gene     | Chr | A1 | A2 | z-score SCZ | z-score COG CHARGE | conjFDR  | prune | p SCZ    | p COG CHARGE |
|-------|------------|----------|-----|----|----|-------------|--------------------|----------|-------|----------|--------------|
| 11    | rs17209365 | CUL9     | 6   | G  | A  | -3,14E+00   | 3,29E+00           | 9,27E-02 | 0     | 1,68E-03 | 9,99E-04     |
| 11    | rs16896344 | CUL9     | 6   | A  | G  | -3,32E+00   | 3,33E+00           | 6,42E-02 | 1     | 9,07E-04 | 8,75E-04     |
| 12    | rs4727614  | BC061919 | 7   | A  | C  | 4,69E+00    | -3,24E+00          | 8,64E-02 | 0     | 2,72E-06 | 1,19E-03     |
| 12    | rs6965384  | LHFPL3   | 7   | G  | A  | 4,67E+00    | -3,22E+00          | 8,64E-02 | 0     | 3,00E-06 | 1,29E-03     |
| 12    | rs7776707  | LHFPL3   | 7   | A  | C  | 4,72E+00    | -3,20E+00          | 8,64E-02 | 0     | 2,41E-06 | 1,39E-03     |
| 12    | rs3823752  | CR591034 | 7   | T  | C  | 4,70E+00    | -3,30E+00          | 7,47E-02 | 0     | 2,60E-06 | 9,56E-04     |
| 12    | rs6948885  | KMT2E    | 7   | T  | C  | 4,66E+00    | -3,19E+00          | 9,95E-02 | 0     | 3,20E-06 | 1,42E-03     |
| 12    | rs10953468 | KMT2E    | 7   | T  | A  | NaN         | NaN                | 8,64E-02 | 0     | 3,61E-06 | 1,40E-03     |
| 12    | rs6967587  | KMT2E    | 7   | T  | C  | 4,64E+00    | -3,19E+00          | 8,64E-02 | 0     | 3,56E-06 | 1,41E-03     |
| 12    | rs1142     | SRPK2    | 7   | T  | C  | 4,12E+00    | -3,21E+00          | 8,64E-02 | 0     | 3,76E-05 | 1,35E-03     |
| 12    | rs1144     | SRPK2    | 7   | C  | T  | 3,96E+00    | -3,22E+00          | 8,64E-02 | 0     | 7,54E-05 | 1,28E-03     |
| 12    | rs7797912  | SRPK2    | 7   | C  | T  | 4,61E+00    | -3,19E+00          | 9,95E-02 | 0     | 4,04E-06 | 1,43E-03     |
| 12    | rs2299304  | SRPK2    | 7   | C  | T  | 4,55E+00    | -3,27E+00          | 7,47E-02 | 0     | 5,44E-06 | 1,07E-03     |
| 12    | rs10487150 | SRPK2    | 7   | C  | A  | 4,78E+00    | -3,40E+00          | 5,50E-02 | 0     | 1,74E-06 | 6,84E-04     |
| 12    | rs10238507 | SRPK2    | 7   | C  | A  | 4,82E+00    | -3,31E+00          | 7,47E-02 | 0     | 1,45E-06 | 9,38E-04     |
| 12    | rs10266871 | SRPK2    | 7   | A  | G  | 4,74E+00    | -3,26E+00          | 7,47E-02 | 0     | 2,12E-06 | 1,10E-03     |
| 12    | rs3779210  | SRPK2    | 7   | T  | C  | 4,63E+00    | -3,28E+00          | 7,47E-02 | 0     | 3,71E-06 | 1,03E-03     |
| 12    | rs4730072  | SRPK2    | 7   | T  | A  | NaN         | NaN                | 7,47E-02 | 0     | 2,91E-06 | 9,59E-04     |
| 12    | rs10277120 | SRPK2    | 7   | A  | T  | NaN         | NaN                | 5,50E-02 | 0     | 3,37E-06 | 6,68E-04     |
| 12    | rs2240463  | SRPK2    | 7   | T  | C  | 4,70E+00    | -3,33E+00          | 6,42E-02 | 0     | 2,65E-06 | 8,76E-04     |
| 12    | rs10281422 | SRPK2    | 7   | A  | G  | 4,69E+00    | -3,33E+00          | 6,42E-02 | 0     | 2,68E-06 | 8,67E-04     |
| 12    | rs41562    | SRPK2    | 7   | C  | T  | 4,71E+00    | -3,32E+00          | 6,42E-02 | 0     | 2,47E-06 | 8,88E-04     |
| 12    | rs2237613  | SRPK2    | 7   | C  | G  | NaN         | NaN                | 7,47E-02 | 0     | 2,56E-06 | 9,20E-04     |
| 12    | rs41563    | SRPK2    | 7   | A  | G  | 4,89E+00    | -3,33E+00          | 6,42E-02 | 0     | 9,84E-07 | 8,66E-04     |
| 12    | rs4730073  | SRPK2    | 7   | C  | A  | 4,75E+00    | -3,24E+00          | 8,64E-02 | 0     | 2,03E-06 | 1,18E-03     |
| 12    | rs10953470 | SRPK2    | 7   | G  | T  | 4,86E+00    | -3,18E+00          | 9,95E-02 | 0     | 1,20E-06 | 1,48E-03     |

| Locus | SNP        | Gene    | Chr | A1 | A2 | z-score SCZ | z-score COG CHARGE | conjFDR  | prune | p SCZ    | p COG CHARGE |
|-------|------------|---------|-----|----|----|-------------|--------------------|----------|-------|----------|--------------|
| 12    | rs2299319  | SRPK2   | 7   | T  | C  | 4,86E+00    | -3,18E+00          | 9,95E-02 | 0     | 1,17E-06 | 1,48E-03     |
| 12    | rs3801282  | SRPK2   | 7   | A  | G  | 4,83E+00    | -3,15E+00          | 9,95E-02 | 0     | 1,35E-06 | 1,61E-03     |
| 12    | rs3801281  | SRPK2   | 7   | T  | C  | 4,86E+00    | -3,13E+00          | 9,95E-02 | 0     | 1,19E-06 | 1,77E-03     |
| 12    | rs6466056  | SRPK2   | 7   | T  | C  | 4,95E+00    | -3,18E+00          | 9,95E-02 | 0     | 7,49E-07 | 1,49E-03     |
| 12    | rs2057883  | SRPK2   | 7   | C  | G  | NaN         | NaN                | 9,95E-02 | 0     | 8,80E-07 | 1,49E-03     |
| 12    | rs2057884  | SRPK2   | 7   | T  | C  | 4,87E+00    | -3,17E+00          | 9,95E-02 | 0     | 1,14E-06 | 1,51E-03     |
| 12    | rs10241415 | SRPK2   | 7   | A  | G  | 4,86E+00    | -3,24E+00          | 8,64E-02 | 0     | 1,19E-06 | 1,20E-03     |
| 12    | rs6466057  | SRPK2   | 7   | T  | C  | 4,68E+00    | -3,20E+00          | 8,64E-02 | 0     | 2,87E-06 | 1,39E-03     |
| 12    | rs1204056  | SRPK2   | 7   | G  | A  | 4,67E+00    | -3,18E+00          | 9,95E-02 | 0     | 3,06E-06 | 1,45E-03     |
| 12    | rs1204058  | SRPK2   | 7   | T  | G  | 4,69E+00    | -3,20E+00          | 8,64E-02 | 0     | 2,80E-06 | 1,39E-03     |
| 12    | rs12334245 | SRPK2   | 7   | C  | T  | 4,52E+00    | -3,29E+00          | 7,47E-02 | 0     | 6,16E-06 | 1,00E-03     |
| 12    | rs2030776  | SRPK2   | 7   | G  | C  | NaN         | NaN                | 7,47E-02 | 0     | 2,75E-06 | 9,33E-04     |
| 12    | rs7357199  | SRPK2   | 7   | C  | G  | NaN         | NaN                | 7,47E-02 | 0     | 2,71E-06 | 9,82E-04     |
| 12    | rs6466064  | SRPK2   | 7   | C  | T  | 4,75E+00    | -3,35E+00          | 6,42E-02 | 0     | 2,05E-06 | 8,14E-04     |
| 12    | rs3801999  | SRPK2   | 7   | G  | A  | 4,64E+00    | -3,37E+00          | 6,42E-02 | 0     | 3,55E-06 | 7,40E-04     |
| 12    | rs3847071  | SRPK2   | 7   | A  | T  | NaN         | NaN                | 3,97E-02 | 0     | 1,42E-05 | 3,91E-04     |
| 12    | rs4266584  | SRPK2   | 7   | A  | C  | 4,07E+00    | -3,62E+00          | 3,35E-02 | 1     | 4,66E-05 | 2,96E-04     |
| 12    | rs4282505  | SRPK2   | 7   | A  | G  | 4,26E+00    | -3,55E+00          | 3,97E-02 | 0     | 2,08E-05 | 3,90E-04     |
| 13    | rs717349   | MED30   | 8   | C  | T  | -3,33E+00   | 3,13E+00           | 9,95E-02 | 1     | 8,65E-04 | 1,77E-03     |
| 13    | rs17740505 | MED30   | 8   | C  | A  | -3,32E+00   | 3,14E+00           | 9,95E-02 | 0     | 9,14E-04 | 1,70E-03     |
| 14    | rs4976976  | TSNARE1 | 8   | A  | G  | -5,33E+00   | 3,26E+00           | 7,47E-02 | 1     | 9,58E-08 | 1,12E-03     |
| 15    | rs12253987 | NEURL   | 10  | A  | T  | NaN         | NaN                | 4,69E-02 | 1     | 9,31E-04 | 4,51E-04     |
| 16    | rs11030380 | METTL15 | 11  | A  | T  | NaN         | NaN                | 5,26E-02 | 0     | 1,41E-03 | 5,84E-05     |
| 16    | rs2582895  | METTL15 | 11  | A  | C  | -3,27E+00   | 3,45E+00           | 4,69E-02 | 0     | 1,07E-03 | 5,61E-04     |
| 16    | rs2585817  | METTL15 | 11  | G  | A  | -3,27E+00   | 3,44E+00           | 5,50E-02 | 0     | 1,07E-03 | 5,82E-04     |
| 16    | rs11030382 | METTL15 | 11  | T  | C  | -3,34E+00   | 3,44E+00           | 5,50E-02 | 0     | 8,52E-04 | 5,91E-04     |

| Locus | SNP        | Gene    | Chr | A1 | A2 | z-score SCZ | z-score COG CHARGE | conjFDR  | prune | p SCZ    | p COG CHARGE |
|-------|------------|---------|-----|----|----|-------------|--------------------|----------|-------|----------|--------------|
| 16    | rs7952220  | METTL15 | 11  | C  | T  | -3,30E+00   | 3,39E+00           | 5,50E-02 | 0     | 9,57E-04 | 6,95E-04     |
| 16    | rs4378371  | METTL15 | 11  | G  | C  | NaN         | NaN                | 6,18E-02 | 0     | 1,19E-03 | 6,87E-04     |
| 16    | rs4520584  | METTL15 | 11  | A  | G  | -3,26E+00   | 3,39E+00           | 5,50E-02 | 0     | 1,10E-03 | 7,05E-04     |
| 16    | rs2585813  | METTL15 | 11  | T  | A  | NaN         | NaN                | 7,19E-02 | 0     | 1,15E-03 | 7,62E-04     |
| 16    | rs2582897  | METTL15 | 11  | C  | T  | -3,27E+00   | 3,23E+00           | 8,64E-02 | 0     | 1,09E-03 | 1,24E-03     |
| 16    | rs2585811  | METTL15 | 11  | A  | G  | -3,26E+00   | 3,38E+00           | 6,42E-02 | 0     | 1,10E-03 | 7,33E-04     |
| 16    | rs11030384 | METTL15 | 11  | T  | A  | NaN         | NaN                | 9,27E-02 | 0     | 1,58E-03 | 9,44E-04     |
| 16    | rs4442537  | METTL15 | 11  | T  | C  | -3,23E+00   | 3,31E+00           | 8,32E-02 | 0     | 1,25E-03 | 9,26E-04     |
| 16    | rs10835362 | METTL15 | 11  | A  | G  | -3,22E+00   | 3,37E+00           | 7,19E-02 | 0     | 1,27E-03 | 7,56E-04     |
| 16    | rs10835363 | METTL15 | 11  | C  | T  | -3,21E+00   | 3,31E+00           | 8,32E-02 | 0     | 1,31E-03 | 9,46E-04     |
| 16    | rs11030385 | METTL15 | 11  | A  | G  | -3,25E+00   | 3,31E+00           | 8,32E-02 | 0     | 1,14E-03 | 9,24E-04     |
| 16    | rs10835365 | METTL15 | 11  | G  | A  | -3,20E+00   | 3,32E+00           | 8,32E-02 | 0     | 1,37E-03 | 9,15E-04     |
| 16    | rs11821132 | METTL15 | 11  | G  | T  | -3,15E+00   | 3,32E+00           | 9,27E-02 | 0     | 1,62E-03 | 9,08E-04     |
| 16    | rs12226610 | METTL15 | 11  | C  | G  | NaN         | NaN                | 8,32E-02 | 0     | 1,21E-03 | 9,33E-04     |
| 16    | rs11030386 | METTL15 | 11  | A  | C  | -3,24E+00   | 3,31E+00           | 8,32E-02 | 0     | 1,18E-03 | 9,29E-04     |
| 16    | rs11030387 | METTL15 | 11  | T  | C  | -3,22E+00   | 3,31E+00           | 8,32E-02 | 0     | 1,29E-03 | 9,32E-04     |
| 16    | rs10767729 | METTL15 | 11  | T  | C  | -3,21E+00   | 3,31E+00           | 8,32E-02 | 0     | 1,35E-03 | 9,27E-04     |
| 16    | rs4923549  | METTL15 | 11  | G  | A  | -3,24E+00   | 3,33E+00           | 7,19E-02 | 0     | 1,17E-03 | 8,84E-04     |
| 16    | rs10767733 | METTL15 | 11  | A  | G  | -3,33E+00   | 3,33E+00           | 6,42E-02 | 0     | 8,74E-04 | 8,81E-04     |
| 16    | rs10767734 | METTL15 | 11  | T  | C  | -3,47E+00   | 3,58E+00           | 3,35E-02 | 1     | 5,21E-04 | 3,49E-04     |
| 17    | rs11062161 | CACNA1C | 12  | C  | T  | 6,09E+00    | -3,15E+00          | 9,95E-02 | 0     | 1,12E-09 | 1,63E-03     |
| 17    | rs2239030  | CACNA1C | 12  | A  | G  | 5,84E+00    | -3,15E+00          | 9,95E-02 | 0     | 5,25E-09 | 1,65E-03     |
| 17    | rs2283291  | CACNA1C | 12  | A  | G  | 5,86E+00    | -3,15E+00          | 9,95E-02 | 0     | 4,74E-09 | 1,61E-03     |
| 17    | rs3794297  | CACNA1C | 12  | T  | C  | 5,96E+00    | -3,16E+00          | 9,95E-02 | 0     | 2,52E-09 | 1,56E-03     |
| 17    | rs882195   | CACNA1C | 12  | C  | G  | NaN         | NaN                | 4,69E-02 | 0     | 1,11E-09 | 4,71E-04     |
| 17    | rs882194   | CACNA1C | 12  | G  | A  | 5,95E+00    | -3,22E+00          | 8,64E-02 | 0     | 2,64E-09 | 1,30E-03     |

| Locus | SNP        | Gene    | Chr | A1 | A2 | z-score SCZ | z-score COG CHARGE | conjFDR  | prune | p SCZ    | p COG CHARGE |
|-------|------------|---------|-----|----|----|-------------|--------------------|----------|-------|----------|--------------|
| 17    | rs2239038  | CACNA1C | 12  | A  | G  | 6,43E+00    | -3,29E+00          | 7,47E-02 | 0     | 1,29E-10 | 9,88E-04     |
| 17    | rs2238057  | CACNA1C | 12  | G  | T  | 6,46E+00    | -3,66E+00          | 2,81E-02 | 1     | 1,02E-10 | 2,50E-04     |
| 17    | rs1860002  | CACNA1C | 12  | C  | T  | 6,76E+00    | -3,46E+00          | 4,69E-02 | 0     | 1,35E-11 | 5,38E-04     |
| 18    | rs3783300  | PRKD1   | 14  | A  | C  | 3,54E+00    | -3,18E+00          | 9,95E-02 | 0     | 4,02E-04 | 1,46E-03     |
| 18    | rs3783301  | PRKD1   | 14  | T  | G  | 3,50E+00    | -3,17E+00          | 9,95E-02 | 0     | 4,59E-04 | 1,51E-03     |
| 18    | rs1108732  | PRKD1   | 14  | T  | C  | 3,55E+00    | -3,13E+00          | 9,95E-02 | 0     | 3,87E-04 | 1,72E-03     |
| 18    | rs7158279  | PRKD1   | 14  | G  | A  | 3,45E+00    | -3,26E+00          | 7,47E-02 | 1     | 5,67E-04 | 1,10E-03     |
| 18    | rs2333613  | PRKD1   | 14  | C  | T  | 3,56E+00    | -3,18E+00          | 9,95E-02 | 0     | 3,74E-04 | 1,48E-03     |
| 18    | rs1959440  | PRKD1   | 14  | T  | G  | 4,03E+00    | -3,27E+00          | 7,47E-02 | 0     | 5,47E-05 | 1,06E-03     |
| 19    | rs2239647  | AKAP6   | 14  | A  | C  | 3,49E+00    | -4,43E+00          | 2,21E-02 | 0     | 4,89E-04 | 9,40E-06     |
| 19    | rs1051695  | AKAP6   | 14  | A  | G  | 3,09E+00    | -4,06E+00          | 6,22E-02 | 0     | 2,02E-03 | 4,81E-05     |
| 19    | rs2300861  | AKAP6   | 14  | C  | T  | 3,22E+00    | -4,14E+00          | 4,44E-02 | 0     | 1,26E-03 | 3,54E-05     |
| 19    | rs2143975  | AKAP6   | 14  | C  | G  | NaN         | NaN                | 8,65E-02 | 0     | 3,18E-03 | 2,44E-06     |
| 19    | rs10145461 | AKAP6   | 14  | T  | G  | -2,92E+00   | 4,31E+00           | 8,65E-02 | 0     | 3,52E-03 | 1,63E-05     |
| 19    | rs17522122 | AKAP6   | 14  | T  | G  | 3,41E+00    | -5,21E+00          | 2,64E-02 | 0     | 6,57E-04 | 1,87E-07     |
| 19    | rs12879159 | AKAP6   | 14  | A  | G  | 3,52E+00    | -4,96E+00          | 1,84E-02 | 1     | 4,27E-04 | 6,98E-07     |
| 19    | rs12882859 | AKAP6   | 14  | T  | A  | NaN         | NaN                | 1,84E-02 | 0     | 4,17E-04 | 7,68E-07     |
| 19    | rs7146265  | AKAP6   | 14  | A  | G  | 3,50E+00    | -4,96E+00          | 2,21E-02 | 0     | 4,69E-04 | 7,08E-07     |
| 19    | rs7145828  | AKAP6   | 14  | G  | A  | 3,51E+00    | -4,96E+00          | 2,21E-02 | 0     | 4,52E-04 | 7,02E-07     |
| 19    | rs12885467 | AKAP6   | 14  | C  | T  | 3,57E+00    | -5,09E+00          | 1,84E-02 | 0     | 3,59E-04 | 3,58E-07     |
| 19    | rs11623122 | AKAP6   | 14  | A  | G  | 3,49E+00    | -4,97E+00          | 2,21E-02 | 0     | 4,79E-04 | 6,72E-07     |
| 19    | rs11623135 | AKAP6   | 14  | T  | C  | 3,49E+00    | -4,84E+00          | 2,21E-02 | 0     | 4,84E-04 | 1,29E-06     |
| 19    | rs12894779 | AKAP6   | 14  | A  | G  | 3,54E+00    | -4,97E+00          | 1,84E-02 | 0     | 3,97E-04 | 6,83E-07     |
| 19    | rs12894833 | AKAP6   | 14  | G  | C  | NaN         | NaN                | 2,21E-02 | 0     | 4,77E-04 | 6,63E-07     |
| 19    | rs12895330 | AKAP6   | 14  | C  | G  | NaN         | NaN                | 6,22E-02 | 0     | 2,15E-03 | 9,68E-07     |
| 19    | rs12896446 | AKAP6   | 14  | G  | T  | 3,47E+00    | -4,87E+00          | 2,21E-02 | 0     | 5,14E-04 | 1,14E-06     |

| Locus | SNP        | Gene     | Chr | A1 | A2 | z-score SCZ | z-score COG<br>CHARGE | conjFDR  | prune | p SCZ    | p COG<br>CHARGE |
|-------|------------|----------|-----|----|----|-------------|-----------------------|----------|-------|----------|-----------------|
| 20    | rs689767   | TP53BP1  | 15  | C  | G  | NaN         | NaN                   | 9,58E-02 | 0     | 1,37E-03 | 1,35E-03        |
| 20    | rs2602141  | TP53BP1  | 15  | G  | T  | -3,20E+00   | 3,20E+00              | 9,58E-02 | 0     | 1,37E-03 | 1,37E-03        |
| 20    | rs536313   | TP53BP1  | 15  | T  | C  | -3,22E+00   | 3,19E+00              | 9,58E-02 | 0     | 1,29E-03 | 1,41E-03        |
| 20    | rs2244981  | TP53BP1  | 15  | C  | T  | -3,21E+00   | 3,21E+00              | 9,58E-02 | 0     | 1,32E-03 | 1,34E-03        |
| 20    | rs493377   | TP53BP1  | 15  | T  | C  | -3,23E+00   | 3,22E+00              | 9,58E-02 | 0     | 1,22E-03 | 1,26E-03        |
| 20    | rs1079309  | TP53BP1  | 15  | A  | C  | -3,36E+00   | 3,23E+00              | 8,64E-02 | 0     | 7,79E-04 | 1,25E-03        |
| 20    | rs2927071  | CATSPER2 | 15  | C  | T  | -3,25E+00   | 3,27E+00              | 8,32E-02 | 0     | 1,14E-03 | 1,07E-03        |
| 20    | rs11070410 | PDIA3    | 15  | A  | G  | -3,27E+00   | 3,23E+00              | 8,64E-02 | 0     | 1,08E-03 | 1,22E-03        |
| 20    | rs686666   | WDR76    | 15  | A  | G  | -3,20E+00   | 3,26E+00              | 8,32E-02 | 0     | 1,35E-03 | 1,11E-03        |
| 20    | rs667476   | FRMD5    | 15  | C  | A  | -3,21E+00   | 3,40E+00              | 6,18E-02 | 0     | 1,33E-03 | 6,75E-04        |
| 20    | rs524908   | FRMD5    | 15  | C  | A  | -3,24E+00   | 3,56E+00              | 4,50E-02 | 1     | 1,20E-03 | 3,70E-04        |
| 21    | rs7167194  | CHD2     | 15  | C  | A  | 2,98E+00    | -3,41E+00             | 9,93E-02 | 1     | 2,86E-03 | 6,57E-04        |
| 22    | rs199504   | WNT3     | 17  | C  | T  | -2,96E+00   | -3,61E+00             | 8,65E-02 | 1     | 3,10E-03 | 3,06E-04        |
| 22    | rs199500   | WNT3     | 17  | T  | C  | -3,21E+00   | -3,21E+00             | 9,58E-02 | 0     | 1,31E-03 | 1,33E-03        |
| 23    | rs7259683  | SCAF1    | 19  | C  | T  | -3,77E+00   | 3,13E+00              | 9,95E-02 | 1     | 1,66E-04 | 1,75E-03        |
| 24    | rs5996092  | WBP2NL   | 22  | G  | A  | -3,25E+00   | 3,53E+00              | 4,50E-02 | 0     | 1,16E-03 | 4,17E-04        |
| 24    | rs5996094  | WBP2NL   | 22  | C  | T  | -3,28E+00   | 3,66E+00              | 3,74E-02 | 0     | 1,02E-03 | 2,53E-04        |
| 24    | rs6002561  | WBP2NL   | 22  | G  | A  | -3,28E+00   | 3,68E+00              | 3,74E-02 | 0     | 1,05E-03 | 2,30E-04        |
| 24    | rs5751191  | WBP2NL   | 22  | T  | C  | -4,69E+00   | 3,51E+00              | 3,97E-02 | 0     | 2,70E-06 | 4,45E-04        |
| 24    | rs5758527  | WBP2NL   | 22  | G  | T  | 4,27E+00    | -3,73E+00             | 2,35E-02 | 0     | 1,98E-05 | 1,89E-04        |
| 24    | rs6519301  | WBP2NL   | 22  | G  | A  | 4,32E+00    | -3,77E+00             | 1,95E-02 | 0     | 1,53E-05 | 1,65E-04        |
| 24    | rs133300   | WBP2NL   | 22  | G  | A  | 4,28E+00    | -3,76E+00             | 1,95E-02 | 0     | 1,84E-05 | 1,70E-04        |
| 24    | rs133301   | WBP2NL   | 22  | T  | C  | 4,29E+00    | -3,77E+00             | 1,95E-02 | 0     | 1,79E-05 | 1,64E-04        |
| 24    | rs133303   | WBP2NL   | 22  | G  | C  | NaN         | NaN                   | 1,95E-02 | 0     | 2,51E-05 | 1,76E-04        |
| 24    | rs133305   | WBP2NL   | 22  | T  | C  | 4,31E+00    | -3,75E+00             | 1,95E-02 | 0     | 1,65E-05 | 1,74E-04        |
| 24    | rs133306   | WBP2NL   | 22  | A  | G  | 4,31E+00    | -3,75E+00             | 1,95E-02 | 0     | 1,66E-05 | 1,76E-04        |

| Locus | SNP       | Gene      | Chr | A1 | A2 | z-score SCZ | z-score COG CHARGE | conjFDR  | prune | p SCZ    | p COG CHARGE |
|-------|-----------|-----------|-----|----|----|-------------|--------------------|----------|-------|----------|--------------|
| 24    | rs5758537 | WBP2NL    | 22  | T  | G  | 4,31E+00    | -3,76E+00          | 1,95E-02 | 0     | 1,67E-05 | 1,72E-04     |
| 24    | rs129856  | WBP2NL    | 22  | G  | C  | NaN         | NaN                | 1,95E-02 | 0     | 1,80E-05 | 1,74E-04     |
| 24    | rs129857  | WBP2NL    | 22  | C  | T  | 4,29E+00    | -3,76E+00          | 1,95E-02 | 0     | 1,81E-05 | 1,71E-04     |
| 24    | rs133330  | WBP2NL    | 22  | A  | G  | 4,31E+00    | -3,74E+00          | 2,35E-02 | 0     | 1,65E-05 | 1,84E-04     |
| 24    | rs133335  | WBP2NL    | 22  | G  | A  | 4,38E+00    | -3,67E+00          | 2,81E-02 | 0     | 1,16E-05 | 2,44E-04     |
| 24    | rs133340  | WBP2NL    | 22  | A  | T  | NaN         | NaN                | 2,35E-02 | 0     | 1,77E-05 | 1,82E-04     |
| 24    | rs133349  | WBP2NL    | 22  | T  | A  | NaN         | NaN                | 2,35E-02 | 0     | 1,42E-05 | 2,03E-04     |
| 24    | rs1063392 | NAGA      | 22  | G  | A  | 4,26E+00    | -3,82E+00          | 1,62E-02 | 0     | 2,02E-05 | 1,32E-04     |
| 24    | rs133373  | NAGA      | 22  | A  | G  | 3,89E+00    | -3,94E+00          | 1,09E-02 | 0     | 1,00E-04 | 8,17E-05     |
| 24    | rs7245    | NDUFA6    | 22  | G  | A  | 4,07E+00    | -3,87E+00          | 1,33E-02 | 0     | 4,66E-05 | 1,10E-04     |
| 24    | rs2284087 | NDUFA6    | 22  | T  | C  | 3,98E+00    | -3,85E+00          | 1,62E-02 | 0     | 6,84E-05 | 1,17E-04     |
| 24    | rs5751216 | NDUFA6    | 22  | G  | T  | 3,93E+00    | -3,85E+00          | 1,62E-02 | 0     | 8,46E-05 | 1,20E-04     |
| 24    | rs6002626 | NDUFA6    | 22  | C  | G  | NaN         | NaN                | 1,62E-02 | 0     | 4,80E-05 | 1,27E-04     |
| 24    | rs5758589 | NDUFA6    | 22  | A  | G  | 3,97E+00    | -3,86E+00          | 1,62E-02 | 0     | 7,22E-05 | 1,13E-04     |
| 24    | rs2142694 | CYP2D6    | 22  | A  | G  | 4,40E+00    | -3,89E+00          | 1,33E-02 | 0     | 1,09E-05 | 1,02E-04     |
| 24    | rs742089  | TCF20     | 22  | A  | G  | 4,12E+00    | -3,48E+00          | 4,69E-02 | 0     | 3,82E-05 | 4,92E-04     |
| 24    | rs5758645 | TCF20     | 22  | G  | T  | 4,28E+00    | -4,24E+00          | 3,13E-03 | 0     | 1,88E-05 | 2,21E-05     |
| 24    | rs5758653 | TCF20     | 22  | T  | G  | 4,70E+00    | -4,45E+00          | 1,31E-03 | 0     | 2,54E-06 | 8,46E-06     |
| 24    | rs5758659 | TCF20     | 22  | T  | C  | 4,80E+00    | -4,58E+00          | 8,39E-04 | 1     | 1,55E-06 | 4,74E-06     |
| 24    | rs5758660 | TCF20     | 22  | A  | C  | 4,76E+00    | -4,47E+00          | 1,31E-03 | 0     | 1,98E-06 | 7,66E-06     |
| 24    | rs5758670 | TCF20     | 22  | C  | T  | 4,57E+00    | -4,32E+00          | 2,52E-03 | 0     | 4,93E-06 | 1,57E-05     |
| 24    | rs5751250 | LOC388906 | 22  | G  | T  | 4,55E+00    | -4,33E+00          | 2,52E-03 | 0     | 5,39E-06 | 1,47E-05     |
| 24    | rs5751255 | LOC388906 | 22  | T  | C  | 4,75E+00    | -4,47E+00          | 1,31E-03 | 0     | 2,05E-06 | 7,78E-06     |
| 24    | rs134873  | LOC388906 | 22  | G  | T  | 5,01E+00    | -4,43E+00          | 1,63E-03 | 0     | 5,53E-07 | 9,42E-06     |
| 24    | rs134877  | LOC388906 | 22  | T  | C  | 4,84E+00    | -4,43E+00          | 1,63E-03 | 0     | 1,28E-06 | 9,57E-06     |
| 24    | rs134900  | LOC388906 | 22  | C  | G  | NaN         | NaN                | 1,31E-03 | 0     | 1,08E-06 | 7,20E-06     |

| <b>Locus</b> | <b>SNP</b> | <b>Gene</b> | <b>Chr</b> | <b>A1</b> | <b>A2</b> | <b>z-score SCZ</b> | <b>z-score COG<br/>CHARGE</b> | <b>conjFDR</b> | <b>prune</b> | <b>p SCZ</b> | <b>p COG<br/>CHARGE</b> |
|--------------|------------|-------------|------------|-----------|-----------|--------------------|-------------------------------|----------------|--------------|--------------|-------------------------|
| 24           | rs134902   | LOC388906   | 22         | A         | G         | 4,86E+00           | -4,52E+00                     | 1,05E-03       | 0            | 1,17E-06     | 6,19E-06                |
| 24           | rs80506    | LOC388906   | 22         | A         | T         | NaN                | NaN                           | 3,13E-03       | 0            | 1,62E-06     | 1,92E-05                |



**eTable 3B. Loci with conjFDR<.10 associated with SCZ and COG COGENT**

| Locus     | SNP        | Gene     | Chr | A1 | A2 | z-score<br>SCZ | z-score COG<br>COGENT | conjFDR  | prune | p SCZ    | p COG<br>COGENT |
|-----------|------------|----------|-----|----|----|----------------|-----------------------|----------|-------|----------|-----------------|
| 1         | rs10189857 | BCL11A   | 2   | G  | A  | -3,91E+00      | -3,60E+00             | 7,17E-02 | 1     | 9,41E-05 | 3,21E-04        |
| <b>*2</b> | rs3021303  | HLA-DRB5 | 6   | T  | G  | -4,20E+00      | 3,52E+00              | 8,65E-02 | 1     | 2,64E-05 | 4,27E-04        |
| 3         | rs10106136 | KCNV1    | 8   | T  | A  | NaN            | NaN                   | 8,65E-02 | 0     | 2,83E-05 | 4,07E-04        |
| 3         | rs10103911 | KCNV1    | 8   | C  | T  | 4,21E+00       | -3,52E+00             | 8,65E-02 | 0     | 2,51E-05 | 4,38E-04        |
| 3         | rs62526783 | KCNV1    | 8   | A  | G  | 5,15E+00       | -3,61E+00             | 7,17E-02 | 1     | 2,56E-07 | 3,06E-04        |
| 4         | rs7096655  | BC032914 | 10  | T  | C  | 3,70E+00       | 3,54E+00              | 8,65E-02 | 1     | 2,14E-04 | 3,95E-04        |
| 4         | rs7920501  | BC032914 | 10  | A  | T  | NaN            | NaN                   | 8,69E-02 | 0     | 2,78E-04 | 3,17E-04        |
| 4         | rs1317707  | BC032914 | 10  | G  | A  | 3,67E+00       | 3,51E+00              | 8,69E-02 | 0     | 2,47E-04 | 4,45E-04        |
| 4         | rs7900126  | BC032914 | 10  | G  | A  | 3,66E+00       | 3,60E+00              | 8,69E-02 | 0     | 2,56E-04 | 3,18E-04        |
| 4         | rs10905650 | BC032914 | 10  | A  | G  | 3,66E+00       | 3,60E+00              | 8,69E-02 | 0     | 2,54E-04 | 3,22E-04        |
| 4         | rs7912446  | BC032914 | 10  | G  | A  | 3,65E+00       | 3,57E+00              | 8,69E-02 | 0     | 2,61E-04 | 3,53E-04        |
| 4         | rs11256437 | BC032914 | 10  | T  | C  | 3,68E+00       | 3,52E+00              | 8,69E-02 | 0     | 2,36E-04 | 4,37E-04        |

**eTable 3C. Loci with conjFDR<.10 associated with SCZ and VNR**

| Locus | SNP        | Gene     | Chr | A1 | A2 | z-score SCZ | z-score VNR | conjFDR  | prune | p SCZ    | p VNR    |
|-------|------------|----------|-----|----|----|-------------|-------------|----------|-------|----------|----------|
| 1     | rs4660731  | TIE1     | 1   | G  | A  | 3,59E+00    | -3,40E+00   | 8,26E-02 | 0     | 3,36E-04 | 6,79E-04 |
| 1     | rs2782651  | HYI      | 1   | C  | G  | NaN         | NaN         | 8,88E-02 | 0     | 3,90E-04 | 4,14E-04 |
| 1     | rs1964952  | HYI      | 1   | A  | G  | 3,59E+00    | -3,52E+00   | 7,41E-02 | 1     | 3,35E-04 | 4,36E-04 |
| 1     | rs11210887 | PTPRF    | 1   | G  | A  | 4,74E+00    | -3,36E+00   | 9,69E-02 | 0     | 2,10E-06 | 7,71E-04 |
| 1     | rs549845   | PTPRF    | 1   | G  | A  | 4,77E+00    | -3,35E+00   | 9,69E-02 | 0     | 1,82E-06 | 8,13E-04 |
| 2     | rs13126505 | BANK1    | 4   | A  | G  | 4,52E+00    | -3,89E+00   | 1,82E-02 | 0     | 6,27E-06 | 1,01E-04 |
| 2     | rs13109404 | BANK1    | 4   | G  | T  | 4,53E+00    | -3,92E+00   | 1,47E-02 | 0     | 5,81E-06 | 8,87E-05 |
| 2     | rs13127398 | BANK1    | 4   | A  | T  | NaN         | NaN         | 1,19E-02 | 0     | 4,13E-06 | 6,98E-05 |
| 2     | rs34592089 | BANK1    | 4   | A  | G  | 4,72E+00    | -3,61E+00   | 4,90E-02 | 0     | 2,35E-06 | 3,09E-04 |
| 2     | rs1813006  | BANK1    | 4   | T  | G  | 4,72E+00    | -3,92E+00   | 1,47E-02 | 0     | 2,38E-06 | 8,79E-05 |
| 2     | rs13101632 | BANK1    | 4   | A  | G  | 3,96E+00    | -3,54E+00   | 5,87E-02 | 0     | 7,63E-05 | 3,96E-04 |
| 2     | rs35225200 | SLC39A8  | 4   | C  | A  | 5,60E+00    | -3,88E+00   | 1,82E-02 | 0     | 2,13E-08 | 1,03E-04 |
| 2     | rs35518360 | SLC39A8  | 4   | T  | A  | NaN         | NaN         | 1,82E-02 | 0     | 2,13E-08 | 1,02E-04 |
| 2     | rs13107325 | SLC39A8  | 4   | T  | C  | 5,51E+00    | -4,38E+00   | 2,47E-03 | 1     | 3,52E-08 | 1,17E-05 |
| 2     | rs13135092 | SLC39A8  | 4   | G  | A  | 5,42E+00    | -3,63E+00   | 4,90E-02 | 0     | 6,04E-08 | 2,86E-04 |
| 3     | rs4946935  | FOXO3    | 6   | A  | G  | 4,31E+00    | -3,36E+00   | 9,69E-02 | 1     | 1,67E-05 | 7,86E-04 |
| 4     | rs9611554  | KIAA1031 | 22  | G  | C  | NaN         | NaN         | 5,87E-02 | 1     | 1,91E-04 | 3,98E-04 |
| 5     | rs5758487  | WBP2NL   | 22  | T  | C  | -3,87E+00   | 4,75E+00    | 2,81E-02 | 0     | 1,08E-04 | 2,01E-06 |
| 5     | rs9607850  | WBP2NL   | 22  | T  | C  | 3,83E+00    | -5,02E+00   | 3,43E-02 | 0     | 1,26E-04 | 5,24E-07 |
| 5     | rs7288838  | WBP2NL   | 22  | C  | T  | 3,64E+00    | -5,01E+00   | 6,15E-02 | 0     | 2,76E-04 | 5,42E-07 |
| 5     | rs4822076  | WBP2NL   | 22  | C  | T  | -4,07E+00   | 3,53E+00    | 5,87E-02 | 0     | 4,63E-05 | 4,12E-04 |
| 5     | rs6519298  | WBP2NL   | 22  | T  | C  | 4,21E+00    | -5,92E+00   | 8,00E-03 | 0     | 2,54E-05 | 3,17E-09 |
| 5     | rs739292   | WBP2NL   | 22  | A  | G  | 4,07E+00    | -5,98E+00   | 1,51E-02 | 0     | 4,69E-05 | 2,28E-09 |
| 5     | rs5751191  | WBP2NL   | 22  | T  | C  | -4,69E+00   | 5,52E+00    | 9,13E-04 | 0     | 2,70E-06 | 3,30E-08 |
| 5     | rs5758527  | WBP2NL   | 22  | G  | T  | 4,27E+00    | -5,93E+00   | 6,46E-03 | 0     | 1,98E-05 | 3,11E-09 |

| Locus | SNP       | Gene   | Chr | A1 | A2 | z-score SCZ | z-score VNR | conjFDR  | prune | p SCZ    | p VNR    |
|-------|-----------|--------|-----|----|----|-------------|-------------|----------|-------|----------|----------|
| 5     | rs5751195 | WBP2NL | 22  | C  | A  | 4,30E+00    | -5,95E+00   | 5,21E-03 | 0     | 1,72E-05 | 2,76E-09 |
| 5     | rs739294  | WBP2NL | 22  | C  | T  | 3,72E+00    | -5,42E+00   | 5,08E-02 | 0     | 1,95E-04 | 6,02E-08 |
| 5     | rs133292  | WBP2NL | 22  | A  | G  | 4,72E+00    | -5,98E+00   | 9,13E-04 | 0     | 2,41E-06 | 2,20E-09 |
| 5     | rs133293  | WBP2NL | 22  | A  | G  | 4,43E+00    | -5,93E+00   | 3,38E-03 | 0     | 9,22E-06 | 3,07E-09 |
| 5     | rs133294  | WBP2NL | 22  | T  | C  | 4,32E+00    | -5,95E+00   | 5,21E-03 | 0     | 1,59E-05 | 2,61E-09 |
| 5     | rs6519301 | WBP2NL | 22  | G  | A  | 4,32E+00    | -5,99E+00   | 5,21E-03 | 0     | 1,53E-05 | 2,10E-09 |
| 5     | rs133300  | WBP2NL | 22  | G  | A  | 4,28E+00    | -6,02E+00   | 6,46E-03 | 0     | 1,84E-05 | 1,70E-09 |
| 5     | rs133301  | WBP2NL | 22  | T  | C  | 4,29E+00    | -5,96E+00   | 6,46E-03 | 0     | 1,79E-05 | 2,47E-09 |
| 5     | rs133303  | WBP2NL | 22  | G  | C  | NaN         | NaN         | 8,00E-03 | 0     | 2,51E-05 | 1,85E-09 |
| 5     | rs133305  | WBP2NL | 22  | T  | C  | 4,31E+00    | -6,02E+00   | 5,21E-03 | 0     | 1,65E-05 | 1,79E-09 |
| 5     | rs133306  | WBP2NL | 22  | A  | G  | 4,31E+00    | -6,01E+00   | 5,21E-03 | 0     | 1,66E-05 | 1,85E-09 |
| 5     | rs133307  | WBP2NL | 22  | A  | C  | 4,30E+00    | -6,04E+00   | 5,21E-03 | 0     | 1,67E-05 | 1,59E-09 |
| 5     | rs5758537 | WBP2NL | 22  | T  | G  | 4,31E+00    | -6,04E+00   | 5,21E-03 | 0     | 1,67E-05 | 1,59E-09 |
| 5     | rs129855  | WBP2NL | 22  | A  | G  | 4,30E+00    | -6,04E+00   | 5,21E-03 | 0     | 1,75E-05 | 1,58E-09 |
| 5     | rs129856  | WBP2NL | 22  | G  | C  | NaN         | NaN         | 6,46E-03 | 0     | 1,80E-05 | 1,64E-09 |
| 5     | rs129857  | WBP2NL | 22  | C  | T  | 4,29E+00    | -6,04E+00   | 6,46E-03 | 0     | 1,81E-05 | 1,58E-09 |
| 5     | rs6002571 | WBP2NL | 22  | A  | G  | 4,29E+00    | -6,04E+00   | 6,46E-03 | 0     | 1,82E-05 | 1,58E-09 |
| 5     | rs133313  | WBP2NL | 22  | T  | G  | 4,28E+00    | -6,06E+00   | 6,46E-03 | 0     | 1,87E-05 | 1,40E-09 |
| 5     | rs133314  | WBP2NL | 22  | A  | G  | 4,28E+00    | -6,03E+00   | 6,46E-03 | 0     | 1,87E-05 | 1,61E-09 |
| 5     | rs133317  | WBP2NL | 22  | A  | G  | 3,58E+00    | -5,48E+00   | 7,41E-02 | 0     | 3,40E-04 | 4,29E-08 |
| 5     | rs133318  | WBP2NL | 22  | A  | G  | 4,37E+00    | -6,05E+00   | 4,20E-03 | 0     | 1,25E-05 | 1,46E-09 |
| 5     | rs133321  | WBP2NL | 22  | G  | A  | 4,30E+00    | -6,03E+00   | 5,21E-03 | 0     | 1,72E-05 | 1,63E-09 |
| 5     | rs133322  | WBP2NL | 22  | G  | A  | 4,30E+00    | -6,16E+00   | 5,21E-03 | 0     | 1,72E-05 | 7,28E-10 |
| 5     | rs133323  | WBP2NL | 22  | C  | T  | 4,31E+00    | -6,05E+00   | 5,21E-03 | 0     | 1,65E-05 | 1,49E-09 |
| 5     | rs133324  | WBP2NL | 22  | A  | C  | 4,30E+00    | -6,02E+00   | 5,21E-03 | 0     | 1,71E-05 | 1,76E-09 |
| 5     | rs133325  | WBP2NL | 22  | A  | G  | 4,30E+00    | -6,00E+00   | 5,21E-03 | 0     | 1,74E-05 | 1,96E-09 |

| Locus | SNP        | Gene   | Chr | A1 | A2 | z-score SCZ | z-score VNR | conjFDR  | prune | p SCZ    | p VNR    |
|-------|------------|--------|-----|----|----|-------------|-------------|----------|-------|----------|----------|
| 5     | rs133326   | WBP2NL | 22  | A  | G  | 4,31E+00    | -6,02E+00   | 5,21E-03 | 0     | 1,65E-05 | 1,72E-09 |
| 5     | rs133327   | WBP2NL | 22  | C  | T  | 4,31E+00    | -6,03E+00   | 5,21E-03 | 0     | 1,61E-05 | 1,64E-09 |
| 5     | rs133328   | WBP2NL | 22  | C  | T  | 4,30E+00    | -6,03E+00   | 5,21E-03 | 0     | 1,68E-05 | 1,62E-09 |
| 5     | rs133330   | WBP2NL | 22  | A  | G  | 4,31E+00    | -6,01E+00   | 5,21E-03 | 0     | 1,65E-05 | 1,83E-09 |
| 5     | rs133335   | WBP2NL | 22  | G  | A  | 4,38E+00    | -6,09E+00   | 4,20E-03 | 0     | 1,16E-05 | 1,10E-09 |
| 5     | rs133336   | WBP2NL | 22  | T  | C  | 4,29E+00    | -6,04E+00   | 6,46E-03 | 0     | 1,81E-05 | 1,58E-09 |
| 5     | rs133339   | WBP2NL | 22  | G  | A  | 4,42E+00    | -6,15E+00   | 3,38E-03 | 0     | 9,96E-06 | 7,77E-10 |
| 5     | rs133340   | WBP2NL | 22  | A  | T  | NaN         | NaN         | 5,21E-03 | 0     | 1,77E-05 | 1,50E-09 |
| 5     | rs133346   | WBP2NL | 22  | T  | G  | 4,36E+00    | -6,04E+00   | 4,20E-03 | 0     | 1,28E-05 | 1,58E-09 |
| 5     | rs2301521  | WBP2NL | 22  | G  | C  | NaN         | NaN         | 2,47E-03 | 0     | 6,08E-06 | 1,30E-05 |
| 5     | rs133347   | WBP2NL | 22  | T  | A  | NaN         | NaN         | 4,20E-03 | 0     | 1,36E-05 | 1,41E-09 |
| 5     | rs133348   | WBP2NL | 22  | T  | C  | 4,05E+00    | -6,08E+00   | 1,51E-02 | 0     | 5,10E-05 | 1,22E-09 |
| 5     | rs133349   | WBP2NL | 22  | T  | A  | NaN         | NaN         | 5,21E-03 | 0     | 1,42E-05 | 1,43E-09 |
| 5     | rs133350   | WBP2NL | 22  | A  | G  | -4,50E+00   | 4,32E+00    | 3,11E-03 | 0     | 6,82E-06 | 1,55E-05 |
| 5     | rs133351   | WBP2NL | 22  | T  | G  | 3,63E+00    | -5,50E+00   | 7,41E-02 | 0     | 2,83E-04 | 3,76E-08 |
| 5     | rs5758553  | WBP2NL | 22  | A  | G  | 4,35E+00    | -6,03E+00   | 4,20E-03 | 0     | 1,39E-05 | 1,63E-09 |
| 5     | rs5751204  | WBP2NL | 22  | C  | T  | -4,53E+00   | 4,20E+00    | 4,90E-03 | 0     | 5,82E-06 | 2,70E-05 |
| 5     | rs133352   | WBP2NL | 22  | C  | A  | -4,41E+00   | 4,09E+00    | 7,67E-03 | 0     | 1,04E-05 | 4,27E-05 |
| 5     | rs4822084  | WBP2NL | 22  | T  | C  | 4,38E+00    | -6,06E+00   | 4,20E-03 | 0     | 1,20E-05 | 1,36E-09 |
| 5     | rs133353   | WBP2NL | 22  | G  | A  | -4,33E+00   | 4,10E+00    | 7,67E-03 | 0     | 1,48E-05 | 4,15E-05 |
| 5     | rs133355   | WBP2NL | 22  | G  | A  | -4,43E+00   | 4,22E+00    | 4,90E-03 | 0     | 9,21E-06 | 2,47E-05 |
| 5     | rs133356   | WBP2NL | 22  | G  | A  | -4,51E+00   | 4,21E+00    | 4,90E-03 | 0     | 6,39E-06 | 2,58E-05 |
| 5     | rs6002586  | WBP2NL | 22  | T  | C  | -4,54E+00   | 4,32E+00    | 3,11E-03 | 0     | 5,72E-06 | 1,53E-05 |
| 5     | rs133357   | WBP2NL | 22  | T  | C  | 4,25E+00    | -6,05E+00   | 6,46E-03 | 0     | 2,16E-05 | 1,46E-09 |
| 5     | rs133358   | WBP2NL | 22  | T  | A  | NaN         | NaN         | 6,46E-03 | 0     | 1,85E-05 | 1,34E-09 |
| 5     | rs34277770 | WBP2NL | 22  | G  | A  | 3,66E+00    | -5,51E+00   | 6,15E-02 | 0     | 2,50E-04 | 3,64E-08 |

| Locus | SNP        | Gene    | Chr | A1 | A2 | z-score SCZ | z-score VNR | conjFDR  | prune | p SCZ    | p VNR    |
|-------|------------|---------|-----|----|----|-------------|-------------|----------|-------|----------|----------|
| 5     | rs5758559  | WBP2NL  | 22  | G  | A  | -4,70E+00   | 4,11E+00    | 7,67E-03 | 0     | 2,55E-06 | 4,04E-05 |
| 5     | rs10854749 | WBP2NL  | 22  | T  | G  | 3,71E+00    | -5,54E+00   | 5,08E-02 | 0     | 2,08E-04 | 3,06E-08 |
| 5     | rs5758562  | WBP2NL  | 22  | C  | G  | NaN         | NaN         | 4,90E-03 | 0     | 6,43E-06 | 2,74E-05 |
| 5     | rs5751209  | WBP2NL  | 22  | A  | G  | -4,51E+00   | 4,14E+00    | 6,14E-03 | 0     | 6,60E-06 | 3,44E-05 |
| 5     | rs5758566  | WBP2NL  | 22  | G  | A  | -4,36E+00   | 4,18E+00    | 6,14E-03 | 0     | 1,32E-05 | 2,94E-05 |
| 5     | rs1063392  | NAGA    | 22  | G  | A  | 4,26E+00    | -6,06E+00   | 6,46E-03 | 0     | 2,02E-05 | 1,37E-09 |
| 5     | rs2013960  | NAGA    | 22  | A  | T  | NaN         | NaN         | 6,46E-03 | 0     | 1,98E-05 | 1,16E-09 |
| 5     | rs2854837  | NAGA    | 22  | G  | A  | -4,56E+00   | 4,30E+00    | 3,11E-03 | 0     | 5,06E-06 | 1,73E-05 |
| 5     | rs2413666  | NAGA    | 22  | C  | T  | -4,22E+00   | 4,17E+00    | 8,00E-03 | 0     | 2,49E-05 | 3,04E-05 |
| 5     | rs133367   | NAGA    | 22  | C  | T  | -3,97E+00   | 4,27E+00    | 2,29E-02 | 0     | 7,30E-05 | 1,99E-05 |
| 5     | rs133368   | NAGA    | 22  | T  | C  | -4,37E+00   | 4,25E+00    | 4,20E-03 | 0     | 1,22E-05 | 2,14E-05 |
| 5     | rs133369   | NAGA    | 22  | C  | T  | -4,36E+00   | 4,19E+00    | 4,90E-03 | 0     | 1,30E-05 | 2,81E-05 |
| 5     | rs133370   | NAGA    | 22  | T  | C  | -4,21E+00   | 4,14E+00    | 8,00E-03 | 0     | 2,52E-05 | 3,49E-05 |
| 5     | rs133371   | NAGA    | 22  | G  | A  | -4,26E+00   | 4,14E+00    | 6,46E-03 | 0     | 2,07E-05 | 3,48E-05 |
| 5     | rs133373   | NAGA    | 22  | A  | G  | 3,89E+00    | -6,24E+00   | 2,81E-02 | 0     | 1,00E-04 | 4,41E-10 |
| 5     | rs133374   | NAGA    | 22  | G  | A  | -4,21E+00   | 4,14E+00    | 8,00E-03 | 0     | 2,58E-05 | 3,47E-05 |
| 5     | rs133375   | NAGA    | 22  | C  | G  | NaN         | NaN         | 7,67E-03 | 0     | 2,17E-05 | 3,77E-05 |
| 5     | rs133376   | NAGA    | 22  | T  | C  | 3,98E+00    | -6,25E+00   | 1,86E-02 | 0     | 6,97E-05 | 4,18E-10 |
| 5     | rs133377   | NAGA    | 22  | C  | T  | -4,19E+00   | 4,18E+00    | 8,00E-03 | 0     | 2,80E-05 | 2,98E-05 |
| 5     | rs2859438  | NAGA    | 22  | A  | T  | NaN         | NaN         | 8,00E-03 | 0     | 2,71E-05 | 3,48E-05 |
| 5     | rs133378   | NAGA    | 22  | G  | C  | NaN         | NaN         | 8,00E-03 | 0     | 2,69E-05 | 3,49E-05 |
| 5     | rs28605764 | NAGA    | 22  | C  | T  | -3,67E+00   | 4,33E+00    | 6,15E-02 | 0     | 2,44E-04 | 1,46E-05 |
| 5     | rs133379   | NAGA    | 22  | A  | G  | -4,35E+00   | 4,23E+00    | 4,90E-03 | 0     | 1,34E-05 | 2,38E-05 |
| 5     | rs133380   | FAM109B | 22  | C  | T  | -4,07E+00   | 4,35E+00    | 1,51E-02 | 0     | 4,74E-05 | 1,34E-05 |
| 5     | rs13057094 | FAM109B | 22  | T  | C  | -4,34E+00   | 4,20E+00    | 5,21E-03 | 0     | 1,42E-05 | 2,69E-05 |
| 5     | rs4822088  | FAM109B | 22  | G  | C  | NaN         | NaN         | 3,43E-02 | 0     | 1,15E-04 | 3,66E-05 |

| Locus | SNP        | Gene     | Chr | A1 | A2 | z-score SCZ | z-score VNR | conjFDR  | prune | p SCZ    | p VNR    |
|-------|------------|----------|-----|----|----|-------------|-------------|----------|-------|----------|----------|
| 5     | rs133381   | FAM109B  | 22  | C  | G  | NaN         | NaN         | 1,86E-02 | 0     | 5,85E-05 | 3,80E-05 |
| 5     | rs133382   | FAM109B  | 22  | C  | T  | -4,23E+00   | 4,12E+00    | 8,00E-03 | 0     | 2,39E-05 | 3,85E-05 |
| 5     | rs133383   | FAM109B  | 22  | T  | C  | 3,98E+00    | -6,20E+00   | 1,86E-02 | 0     | 7,00E-05 | 5,77E-10 |
| 5     | rs1807494  | FAM109B  | 22  | G  | C  | NaN         | NaN         | 8,00E-03 | 0     | 2,43E-05 | 3,30E-05 |
| 5     | rs8135801  | FAM109B  | 22  | G  | A  | -4,25E+00   | 4,16E+00    | 6,46E-03 | 0     | 2,16E-05 | 3,16E-05 |
| 5     | rs2269524  | SMDT1    | 22  | G  | T  | -4,24E+00   | 4,17E+00    | 6,46E-03 | 0     | 2,23E-05 | 3,11E-05 |
| 5     | rs6002592  | C22ORF32 | 22  | C  | A  | -4,20E+00   | 4,19E+00    | 8,00E-03 | 0     | 2,72E-05 | 2,84E-05 |
| 5     | rs6002593  | C22ORF32 | 22  | T  | A  | NaN         | NaN         | 9,90E-03 | 0     | 3,30E-05 | 3,55E-05 |
| 5     | rs2071711  | C22ORF32 | 22  | C  | G  | NaN         | NaN         | 9,90E-03 | 0     | 2,99E-05 | 1,73E-05 |
| 5     | rs5758574  | NDUFA6   | 22  | G  | C  | NaN         | NaN         | 1,86E-02 | 0     | 6,51E-05 | 3,63E-10 |
| 5     | rs7245     | NDUFA6   | 22  | G  | A  | 4,07E+00    | -6,29E+00   | 1,51E-02 | 0     | 4,66E-05 | 3,26E-10 |
| 5     | rs4147641  | NDUFA6   | 22  | G  | C  | NaN         | NaN         | 6,46E-03 | 0     | 2,02E-05 | 2,02E-05 |
| 5     | rs6002596  | NDUFA6   | 22  | A  | G  | -4,41E+00   | 4,20E+00    | 4,90E-03 | 0     | 1,05E-05 | 2,65E-05 |
| 5     | rs4147640  | NDUFA6   | 22  | C  | T  | -4,31E+00   | 4,26E+00    | 5,21E-03 | 0     | 1,61E-05 | 2,03E-05 |
| 5     | rs2284087  | NDUFA6   | 22  | T  | C  | 3,98E+00    | -6,29E+00   | 1,86E-02 | 0     | 6,84E-05 | 3,26E-10 |
| 5     | rs1801311  | NDUFA6   | 22  | A  | G  | -4,35E+00   | 4,24E+00    | 4,20E-03 | 0     | 1,38E-05 | 2,21E-05 |
| 5     | rs4147638  | NDUFA6   | 22  | A  | G  | -4,30E+00   | 4,27E+00    | 5,21E-03 | 0     | 1,73E-05 | 1,96E-05 |
| 5     | rs6002597  | CR597807 | 22  | A  | C  | -4,19E+00   | 4,27E+00    | 8,00E-03 | 0     | 2,79E-05 | 2,00E-05 |
| 5     | rs6002598  | CR597807 | 22  | G  | A  | -3,60E+00   | 4,23E+00    | 7,41E-02 | 0     | 3,16E-04 | 2,33E-05 |
| 5     | rs6002600  | CR597807 | 22  | A  | G  | -4,35E+00   | 4,25E+00    | 4,20E-03 | 0     | 1,37E-05 | 2,15E-05 |
| 5     | rs6002601  | CR597807 | 22  | T  | A  | NaN         | NaN         | 4,20E-03 | 0     | 1,40E-05 | 2,09E-05 |
| 5     | rs5758577  | CR597807 | 22  | G  | C  | NaN         | NaN         | 1,22E-02 | 0     | 3,83E-05 | 2,55E-10 |
| 5     | rs5758578  | CR597807 | 22  | A  | C  | 4,02E+00    | -6,32E+00   | 1,86E-02 | 0     | 5,83E-05 | 2,65E-10 |
| 5     | rs61527837 | CR597807 | 22  | T  | C  | -4,33E+00   | 4,26E+00    | 5,21E-03 | 0     | 1,48E-05 | 2,00E-05 |
| 5     | rs5996108  | CR597807 | 22  | T  | C  | -4,53E+00   | 4,36E+00    | 2,47E-03 | 0     | 5,82E-06 | 1,31E-05 |
| 5     | rs8138500  | CR597807 | 22  | T  | G  | -4,34E+00   | 4,28E+00    | 4,20E-03 | 0     | 1,40E-05 | 1,84E-05 |

| Locus | SNP        | Gene     | Chr | A1 | A2 | z-score SCZ | z-score VNR | conjFDR  | prune | p SCZ    | p VNR    |
|-------|------------|----------|-----|----|----|-------------|-------------|----------|-------|----------|----------|
| 5     | rs7292241  | CR597807 | 22  | A  | G  | -4,47E+00   | 4,24E+00    | 4,90E-03 | 0     | 7,90E-06 | 2,27E-05 |
| 5     | rs7291996  | CR597807 | 22  | T  | C  | -4,32E+00   | 4,26E+00    | 5,21E-03 | 0     | 1,55E-05 | 2,01E-05 |
| 5     | rs6002602  | CR597807 | 22  | A  | G  | -4,34E+00   | 4,26E+00    | 4,20E-03 | 0     | 1,41E-05 | 2,00E-05 |
| 5     | rs6002603  | CR597807 | 22  | G  | C  | NaN         | NaN         | 4,20E-03 | 0     | 1,29E-05 | 2,06E-05 |
| 5     | rs73421049 | CR597807 | 22  | A  | G  | -4,26E+00   | 4,26E+00    | 6,46E-03 | 0     | 2,01E-05 | 2,06E-05 |
| 5     | rs6002604  | CR597807 | 22  | T  | A  | NaN         | NaN         | 5,21E-03 | 0     | 1,43E-05 | 1,57E-05 |
| 5     | rs5996109  | NDUFA6   | 22  | G  | A  | -4,34E+00   | 4,32E+00    | 5,21E-03 | 0     | 1,44E-05 | 1,55E-05 |
| 5     | rs5996110  | CR597807 | 22  | G  | A  | -4,16E+00   | 4,26E+00    | 9,90E-03 | 0     | 3,23E-05 | 2,06E-05 |
| 5     | rs5996111  | CR597807 | 22  | T  | C  | -4,46E+00   | 4,24E+00    | 4,90E-03 | 0     | 8,17E-06 | 2,25E-05 |
| 5     | rs6002605  | CR597807 | 22  | G  | A  | -4,31E+00   | 4,26E+00    | 5,21E-03 | 0     | 1,61E-05 | 2,00E-05 |
| 5     | rs6002606  | CR597807 | 22  | C  | T  | -4,17E+00   | 4,26E+00    | 9,90E-03 | 0     | 3,11E-05 | 2,07E-05 |
| 5     | rs6002607  | CR597807 | 22  | C  | T  | 4,10E+00    | -6,30E+00   | 1,22E-02 | 0     | 4,17E-05 | 3,05E-10 |
| 5     | rs6002608  | CR597807 | 22  | T  | C  | 4,10E+00    | -6,31E+00   | 1,22E-02 | 0     | 4,18E-05 | 2,87E-10 |
| 5     | rs6002609  | CR597807 | 22  | A  | C  | -4,50E+00   | 4,35E+00    | 2,47E-03 | 0     | 6,67E-06 | 1,34E-05 |
| 5     | rs6002610  | CR597807 | 22  | T  | C  | -4,33E+00   | 4,25E+00    | 5,21E-03 | 0     | 1,51E-05 | 2,12E-05 |
| 5     | rs12157818 | CR597807 | 22  | T  | C  | -4,30E+00   | 4,25E+00    | 5,21E-03 | 0     | 1,67E-05 | 2,13E-05 |
| 5     | rs9620026  | CR597807 | 22  | T  | C  | -4,33E+00   | 4,25E+00    | 5,21E-03 | 0     | 1,50E-05 | 2,10E-05 |
| 5     | rs28817600 | CR597807 | 22  | G  | A  | -4,25E+00   | 4,25E+00    | 6,46E-03 | 0     | 2,16E-05 | 2,10E-05 |
| 5     | rs28791586 | CR597807 | 22  | G  | A  | -4,34E+00   | 4,25E+00    | 5,21E-03 | 0     | 1,45E-05 | 2,11E-05 |
| 5     | rs2839708  | NDUFA6   | 22  | G  | A  | -4,33E+00   | 4,27E+00    | 5,21E-03 | 0     | 1,53E-05 | 1,95E-05 |
| 5     | rs6519306  | CR597807 | 22  | C  | T  | -4,34E+00   | 4,29E+00    | 5,21E-03 | 0     | 1,45E-05 | 1,80E-05 |
| 5     | rs6002614  | CR597807 | 22  | A  | G  | -4,34E+00   | 4,24E+00    | 5,21E-03 | 0     | 1,45E-05 | 2,26E-05 |
| 5     | rs6002615  | NDUFA6   | 22  | G  | A  | -4,33E+00   | 4,21E+00    | 5,21E-03 | 0     | 1,51E-05 | 2,53E-05 |
| 5     | rs6002616  | NDUFA6   | 22  | G  | A  | -4,27E+00   | 4,23E+00    | 6,46E-03 | 0     | 1,95E-05 | 2,35E-05 |
| 5     | rs8141702  | CR597807 | 22  | A  | G  | -4,44E+00   | 4,19E+00    | 4,90E-03 | 0     | 8,88E-06 | 2,82E-05 |
| 5     | rs2413668  | CR597807 | 22  | G  | A  | 4,01E+00    | -6,32E+00   | 1,86E-02 | 0     | 6,14E-05 | 2,66E-10 |

| Locus | SNP        | Gene     | Chr | A1 | A2 | z-score SCZ | z-score VNR | conjFDR  | prune | p SCZ    | p VNR    |
|-------|------------|----------|-----|----|----|-------------|-------------|----------|-------|----------|----------|
| 5     | rs5996113  | CR597807 | 22  | G  | C  | NaN         | NaN         | 6,14E-03 | 0     | 1,01E-05 | 2,95E-05 |
| 5     | rs7364289  | CR597807 | 22  | C  | A  | -4,34E+00   | 4,22E+00    | 5,21E-03 | 0     | 1,45E-05 | 2,44E-05 |
| 5     | rs7364293  | CR597807 | 22  | T  | C  | -4,29E+00   | 4,25E+00    | 5,21E-03 | 0     | 1,75E-05 | 2,13E-05 |
| 5     | rs2413669  | NDUFA6   | 22  | C  | A  | -4,33E+00   | 4,22E+00    | 5,21E-03 | 0     | 1,52E-05 | 2,45E-05 |
| 5     | rs6002618  | CR597807 | 22  | C  | G  | NaN         | NaN         | 5,21E-03 | 0     | 1,57E-05 | 2,46E-05 |
| 5     | rs5751216  | NDUFA6   | 22  | G  | T  | 3,93E+00    | -6,27E+00   | 2,29E-02 | 0     | 8,46E-05 | 3,72E-10 |
| 5     | rs5996115  | CR597807 | 22  | G  | C  | NaN         | NaN         | 5,21E-03 | 0     | 1,51E-05 | 2,49E-05 |
| 5     | rs6002621  | NDUFA6   | 22  | C  | A  | -4,34E+00   | 4,21E+00    | 4,90E-03 | 0     | 1,41E-05 | 2,52E-05 |
| 5     | rs2839710  | CR597807 | 22  | C  | T  | -4,30E+00   | 4,21E+00    | 5,21E-03 | 0     | 1,72E-05 | 2,50E-05 |
| 5     | rs2413670  | CR597807 | 22  | G  | C  | NaN         | NaN         | 1,86E-02 | 0     | 6,04E-05 | 3,52E-10 |
| 5     | rs2413671  | CR597807 | 22  | G  | A  | 4,02E+00    | -6,27E+00   | 1,86E-02 | 0     | 5,92E-05 | 3,71E-10 |
| 5     | rs7286375  | CR597807 | 22  | C  | G  | NaN         | NaN         | 1,22E-02 | 0     | 4,31E-05 | 2,43E-05 |
| 5     | rs61665536 | CR597807 | 22  | G  | A  | -4,32E+00   | 4,22E+00    | 5,21E-03 | 0     | 1,53E-05 | 2,44E-05 |
| 5     | rs2413672  | NDUFA6   | 22  | T  | C  | -4,32E+00   | 4,24E+00    | 5,21E-03 | 0     | 1,54E-05 | 2,28E-05 |
| 5     | rs6002623  | NDUFA6   | 22  | A  | G  | -4,33E+00   | 4,22E+00    | 5,21E-03 | 0     | 1,49E-05 | 2,43E-05 |
| 5     | rs6002624  | CR597807 | 22  | C  | G  | NaN         | NaN         | 5,21E-03 | 0     | 1,74E-05 | 2,31E-05 |
| 5     | rs11090076 | NDUFA6   | 22  | C  | T  | -4,41E+00   | 4,11E+00    | 7,67E-03 | 0     | 1,05E-05 | 3,99E-05 |
| 5     | rs8143153  | CR597807 | 22  | C  | G  | NaN         | NaN         | 6,46E-03 | 0     | 1,95E-05 | 2,74E-05 |
| 5     | rs12161070 | CR597807 | 22  | A  | C  | -4,23E+00   | 4,04E+00    | 9,57E-03 | 0     | 2,32E-05 | 5,38E-05 |
| 5     | rs12161096 | CR597807 | 22  | T  | C  | -4,20E+00   | 4,17E+00    | 8,00E-03 | 0     | 2,70E-05 | 3,01E-05 |
| 5     | rs12157344 | CR597807 | 22  | A  | G  | -4,13E+00   | 4,05E+00    | 1,22E-02 | 0     | 3,58E-05 | 5,18E-05 |
| 5     | rs5751220  | CR597807 | 22  | A  | C  | 4,04E+00    | -6,32E+00   | 1,51E-02 | 0     | 5,45E-05 | 2,54E-10 |
| 5     | rs8138678  | NDUFA6   | 22  | G  | A  | -4,28E+00   | 4,18E+00    | 6,46E-03 | 0     | 1,85E-05 | 2,96E-05 |
| 5     | rs12158568 | CR597807 | 22  | C  | T  | -4,26E+00   | 4,18E+00    | 6,46E-03 | 0     | 2,05E-05 | 2,87E-05 |
| 5     | rs5996116  | CR597807 | 22  | A  | G  | -4,29E+00   | 4,10E+00    | 7,67E-03 | 0     | 1,76E-05 | 4,17E-05 |
| 5     | rs5758587  | CR597807 | 22  | C  | G  | NaN         | NaN         | 1,86E-02 | 0     | 6,35E-05 | 3,29E-10 |



| Locus | SNP         | Gene     | Chr | A1 | A2 | z-score SCZ | z-score VNR | conjFDR  | prune | p SCZ    | p VNR    |
|-------|-------------|----------|-----|----|----|-------------|-------------|----------|-------|----------|----------|
| 5     | rs6002625   | CR597807 | 22  | G  | A  | -4,35E+00   | 4,30E+00    | 4,20E-03 | 0     | 1,35E-05 | 1,73E-05 |
| 5     | rs6002626   | NDUFA6   | 22  | C  | G  | NaN         | NaN         | 1,51E-02 | 0     | 4,80E-05 | 2,92E-10 |
| 5     | rs5758589   | NDUFA6   | 22  | A  | G  | 3,97E+00    | -6,26E+00   | 2,29E-02 | 0     | 7,22E-05 | 3,95E-10 |
| 5     | rs764481    | NDUFA6   | 22  | A  | G  | -4,29E+00   | 4,18E+00    | 6,46E-03 | 0     | 1,79E-05 | 2,97E-05 |
| 5     | rs34385013  | AK123630 | 22  | A  | G  | 3,86E+00    | -6,16E+00   | 3,43E-02 | 0     | 1,14E-04 | 7,21E-10 |
| 5     | rs35028622  | AK123630 | 22  | A  | C  | 3,82E+00    | -6,10E+00   | 3,43E-02 | 0     | 1,33E-04 | 1,08E-09 |
| 5     | rs116390392 | AK123630 | 22  | T  | C  | -4,55E+00   | 4,09E+00    | 7,67E-03 | 0     | 5,32E-06 | 4,31E-05 |
| 5     | rs1135840   | AK123630 | 22  | C  | G  | NaN         | NaN         | 3,43E-02 | 0     | 1,39E-04 | 1,06E-09 |
| 5     | rs28371730  | AK123630 | 22  | T  | C  | -4,18E+00   | 4,05E+00    | 9,90E-03 | 0     | 2,94E-05 | 5,21E-05 |
| 5     | rs16947     | AK123630 | 22  | A  | G  | -4,23E+00   | 4,07E+00    | 9,57E-03 | 0     | 2,30E-05 | 4,68E-05 |
| 5     | rs1058164   | AK123630 | 22  | C  | G  | NaN         | NaN         | 5,08E-02 | 0     | 2,17E-04 | 6,40E-10 |
| 5     | rs28371699  | AK123630 | 22  | C  | A  | 3,89E+00    | -6,29E+00   | 2,81E-02 | 0     | 1,02E-04 | 3,22E-10 |
| 5     | rs28633410  | AK123630 | 22  | T  | C  | -4,37E+00   | 4,15E+00    | 6,14E-03 | 0     | 1,23E-05 | 3,28E-05 |
| 5     | rs28735595  | AK123630 | 22  | T  | C  | 3,70E+00    | -6,11E+00   | 5,08E-02 | 0     | 2,14E-04 | 9,78E-10 |
| 5     | rs1080983   | AK123630 | 22  | T  | C  | -4,42E+00   | 4,07E+00    | 9,57E-03 | 0     | 9,96E-06 | 4,66E-05 |
| 5     | rs28680494  | AK123630 | 22  | C  | A  | 3,98E+00    | -6,11E+00   | 1,86E-02 | 0     | 6,94E-05 | 9,71E-10 |
| 5     | rs28439297  | AK123630 | 22  | T  | C  | 3,98E+00    | -6,11E+00   | 1,86E-02 | 0     | 6,95E-05 | 9,72E-10 |
| 5     | rs28542726  | AK123630 | 22  | T  | G  | 4,02E+00    | -6,22E+00   | 1,86E-02 | 0     | 5,76E-05 | 5,12E-10 |
| 5     | rs28369142  | AK123630 | 22  | C  | A  | -4,27E+00   | 4,31E+00    | 6,46E-03 | 0     | 1,94E-05 | 1,65E-05 |
| 5     | rs28579115  | AK123630 | 22  | T  | G  | 4,20E+00    | -6,29E+00   | 8,00E-03 | 0     | 2,71E-05 | 3,17E-10 |
| 5     | rs28670611  | AK123630 | 22  | T  | C  | 4,17E+00    | -6,12E+00   | 9,90E-03 | 0     | 3,01E-05 | 9,25E-10 |
| 5     | rs9623531   | AK123630 | 22  | C  | T  | -4,58E+00   | 4,00E+00    | 1,19E-02 | 0     | 4,55E-06 | 6,22E-05 |
| 5     | rs28712237  | AK123630 | 22  | A  | G  | -4,51E+00   | 3,99E+00    | 1,19E-02 | 0     | 6,61E-06 | 6,67E-05 |
| 5     | rs4993393   | AK123630 | 22  | G  | A  | -4,48E+00   | 3,76E+00    | 2,75E-02 | 0     | 7,33E-06 | 1,71E-04 |
| 5     | rs28515621  | AK123630 | 22  | G  | T  | -4,63E+00   | 4,06E+00    | 9,57E-03 | 0     | 3,74E-06 | 4,89E-05 |
| 5     | rs2743449   | AK123630 | 22  | T  | C  | 4,43E+00    | -6,06E+00   | 3,38E-03 | 0     | 9,52E-06 | 1,37E-09 |

| Locus | SNP        | Gene     | Chr | A1 | A2 | z-score SCZ | z-score VNR | conjFDR  | prune | p SCZ    | p VNR    |
|-------|------------|----------|-----|----|----|-------------|-------------|----------|-------|----------|----------|
| 5     | rs28570317 | AK123630 | 22  | C  | G  | NaN         | NaN         | 7,67E-03 | 0     | 5,24E-06 | 4,13E-05 |
| 5     | rs6002633  | CYP2D7P1 | 22  | T  | C  | -4,63E+00   | 3,91E+00    | 1,82E-02 | 0     | 3,66E-06 | 9,09E-05 |
| 5     | rs2743451  | CYP2D7P1 | 22  | C  | T  | 4,38E+00    | -5,88E+00   | 4,20E-03 | 0     | 1,18E-05 | 4,15E-09 |
| 5     | rs2860372  | CYP2D7P1 | 22  | C  | T  | -4,83E+00   | 5,24E+00    | 4,70E-04 | 0     | 1,39E-06 | 1,61E-07 |
| 5     | rs28733092 | CYP2D7P1 | 22  | C  | T  | -5,00E+00   | 4,11E+00    | 7,67E-03 | 0     | 5,77E-07 | 4,00E-05 |
| 5     | rs3020736  | CYP2D7P1 | 22  | A  | G  | -4,88E+00   | 4,14E+00    | 6,14E-03 | 0     | 1,04E-06 | 3,53E-05 |
| 5     | rs56404506 | CYP2D7P1 | 22  | T  | C  | -4,12E+00   | 3,66E+00    | 4,06E-02 | 0     | 3,74E-05 | 2,56E-04 |
| 5     | rs1800754  | CYP2D7P1 | 22  | G  | A  | 4,42E+00    | -6,29E+00   | 3,38E-03 | 0     | 1,00E-05 | 3,07E-10 |
| 5     | rs1058167  | CYP2D7P1 | 22  | A  | G  | -4,73E+00   | 4,30E+00    | 3,11E-03 | 0     | 2,27E-06 | 1,67E-05 |
| 5     | rs3021083  | CYP2D7P1 | 22  | C  | T  | 4,42E+00    | -6,18E+00   | 3,38E-03 | 0     | 9,77E-06 | 6,29E-10 |
| 5     | rs28514673 | CYP2D7P1 | 22  | G  | A  | -4,56E+00   | 4,12E+00    | 7,67E-03 | 0     | 5,03E-06 | 3,87E-05 |
| 5     | rs36093924 | CYP2D7P1 | 22  | T  | C  | 4,11E+00    | -6,39E+00   | 1,22E-02 | 0     | 3,92E-05 | 1,63E-10 |
| 5     | rs2743459  | CYP2D7P1 | 22  | T  | G  | 4,55E+00    | -6,21E+00   | 1,76E-03 | 0     | 5,45E-06 | 5,39E-10 |
| 5     | rs2854740  | CYP2D7P1 | 22  | G  | A  | 4,49E+00    | -6,13E+00   | 2,73E-03 | 0     | 7,09E-06 | 9,02E-10 |
| 5     | rs2743461  | CYP2D6   | 22  | G  | A  | 4,42E+00    | -6,34E+00   | 3,38E-03 | 0     | 9,77E-06 | 2,30E-10 |
| 5     | rs5758605  | CYP2D6   | 22  | A  | G  | 4,41E+00    | -6,50E+00   | 3,38E-03 | 0     | 1,02E-05 | 8,28E-11 |
| 5     | rs2142694  | CYP2D6   | 22  | A  | G  | 4,40E+00    | -6,52E+00   | 3,38E-03 | 0     | 1,09E-05 | 7,18E-11 |
| 5     | rs2854743  | CYP2D6   | 22  | A  | C  | -4,51E+00   | 4,63E+00    | 2,19E-03 | 0     | 6,41E-06 | 3,74E-06 |
| 5     | rs2743462  | CYP2D6   | 22  | G  | A  | 4,38E+00    | -6,51E+00   | 4,20E-03 | 0     | 1,21E-05 | 7,37E-11 |
| 5     | rs2743465  | CYP2D6   | 22  | A  | G  | 4,38E+00    | -5,99E+00   | 4,20E-03 | 0     | 1,20E-05 | 2,09E-09 |
| 5     | rs2743467  | TCF20    | 22  | G  | A  | -4,35E+00   | 4,24E+00    | 4,20E-03 | 0     | 1,38E-05 | 2,21E-05 |
| 5     | rs2743468  | TCF20    | 22  | A  | G  | -4,24E+00   | 4,23E+00    | 6,46E-03 | 0     | 2,22E-05 | 2,30E-05 |
| 5     | rs5758619  | TCF20    | 22  | C  | T  | 4,08E+00    | -5,95E+00   | 1,51E-02 | 0     | 4,51E-05 | 2,65E-09 |
| 5     | rs5758623  | TCF20    | 22  | C  | G  | NaN         | NaN         | 5,21E-03 | 0     | 1,72E-05 | 4,48E-09 |
| 5     | rs742089   | TCF20    | 22  | A  | G  | 4,12E+00    | -5,95E+00   | 1,22E-02 | 0     | 3,82E-05 | 2,73E-09 |
| 5     | rs760648   | TCF20    | 22  | A  | G  | 4,83E+00    | -4,95E+00   | 4,70E-04 | 0     | 1,40E-06 | 7,54E-07 |

| Locus | SNP        | Gene      | Chr | A1 | A2 | z-score SCZ | z-score VNR | conjFDR  | prune | p SCZ    | p VNR    |
|-------|------------|-----------|-----|----|----|-------------|-------------|----------|-------|----------|----------|
| 5     | rs2413684  | TCF20     | 22  | T  | C  | 4,46E+00    | -5,94E+00   | 2,73E-03 | 0     | 8,08E-06 | 2,81E-09 |
| 5     | rs2899355  | TCF20     | 22  | C  | T  | 4,34E+00    | -6,13E+00   | 5,21E-03 | 0     | 1,42E-05 | 8,99E-10 |
| 5     | rs5758645  | TCF20     | 22  | G  | T  | 4,28E+00    | -5,79E+00   | 6,46E-03 | 0     | 1,88E-05 | 6,90E-09 |
| 5     | rs17002876 | TCF20     | 22  | G  | C  | NaN         | NaN         | 1,47E-02 | 0     | 2,33E-05 | 7,56E-05 |
| 5     | rs5751241  | TCF20     | 22  | A  | G  | 4,28E+00    | -5,73E+00   | 6,46E-03 | 0     | 1,83E-05 | 1,03E-08 |
| 5     | rs6002655  | TCF20     | 22  | T  | C  | 5,01E+00    | -5,17E+00   | 1,92E-04 | 1     | 5,48E-07 | 2,29E-07 |
| 5     | rs5758653  | TCF20     | 22  | T  | G  | 4,70E+00    | -5,50E+00   | 9,13E-04 | 0     | 2,54E-06 | 3,90E-08 |
| 5     | rs2143139  | TCF20     | 22  | G  | C  | NaN         | NaN         | 1,47E-02 | 0     | 2,36E-05 | 8,14E-05 |
| 5     | rs5758659  | TCF20     | 22  | T  | C  | 4,80E+00    | -5,49E+00   | 5,87E-04 | 0     | 1,55E-06 | 4,13E-08 |
| 5     | rs5758660  | TCF20     | 22  | A  | C  | 4,76E+00    | -5,42E+00   | 7,32E-04 | 0     | 1,98E-06 | 5,93E-08 |
| 5     | rs5758670  | TCF20     | 22  | C  | T  | 4,57E+00    | -5,35E+00   | 1,76E-03 | 0     | 4,93E-06 | 8,92E-08 |
| 5     | rs5751250  | LOC388906 | 22  | G  | T  | 4,55E+00    | -5,36E+00   | 1,76E-03 | 0     | 5,39E-06 | 8,20E-08 |
| 5     | rs5758677  | LOC388906 | 22  | C  | A  | 4,74E+00    | -5,53E+00   | 7,32E-04 | 0     | 2,09E-06 | 3,23E-08 |
| 5     | rs5751255  | LOC388906 | 22  | T  | C  | 4,75E+00    | -5,52E+00   | 7,32E-04 | 0     | 2,05E-06 | 3,31E-08 |
| 5     | rs134867   | LOC388906 | 22  | T  | C  | -4,14E+00   | 3,63E+00    | 4,90E-02 | 0     | 3,45E-05 | 2,84E-04 |
| 5     | rs134869   | LOC388906 | 22  | A  | G  | 4,67E+00    | -5,49E+00   | 1,14E-03 | 0     | 2,99E-06 | 4,12E-08 |
| 5     | rs134873   | LOC388906 | 22  | G  | T  | 5,01E+00    | -5,43E+00   | 1,92E-04 | 0     | 5,53E-07 | 5,64E-08 |
| 5     | rs134874   | LOC388906 | 22  | A  | G  | -4,54E+00   | 3,75E+00    | 3,35E-02 | 0     | 5,69E-06 | 1,79E-04 |
| 5     | rs134877   | LOC388906 | 22  | T  | C  | 4,84E+00    | -5,32E+00   | 4,70E-04 | 0     | 1,28E-06 | 1,01E-07 |
| 5     | rs134878   | LOC388906 | 22  | A  | G  | -4,38E+00   | 3,85E+00    | 2,24E-02 | 0     | 1,20E-05 | 1,20E-04 |
| 5     | rs134879   | LOC388906 | 22  | C  | A  | 4,84E+00    | -5,36E+00   | 4,70E-04 | 0     | 1,28E-06 | 8,23E-08 |
| 5     | rs134882   | LOC388906 | 22  | C  | T  | 4,85E+00    | -5,44E+00   | 4,70E-04 | 0     | 1,24E-06 | 5,45E-08 |
| 5     | rs134885   | LOC388906 | 22  | C  | G  | NaN         | NaN         | 4,06E-02 | 0     | 1,20E-05 | 2,54E-04 |
| 5     | rs134886   | LOC388906 | 22  | A  | G  | -4,36E+00   | 3,67E+00    | 4,06E-02 | 0     | 1,32E-05 | 2,47E-04 |
| 5     | rs134887   | LOC388906 | 22  | A  | G  | -4,39E+00   | 3,68E+00    | 4,06E-02 | 0     | 1,15E-05 | 2,30E-04 |
| 5     | rs134888   | LOC388906 | 22  | C  | T  | -4,45E+00   | 3,67E+00    | 4,06E-02 | 0     | 8,55E-06 | 2,41E-04 |

| <b>Locus</b> | <b>SNP</b> | <b>Gene</b> | <b>Chr</b> | <b>A1</b> | <b>A2</b> | <b>z-score SCZ</b> | <b>z-score VNR</b> | <b>conjFDR</b> | <b>prune</b> | <b>p SCZ</b> | <b>p VNR</b> |
|--------------|------------|-------------|------------|-----------|-----------|--------------------|--------------------|----------------|--------------|--------------|--------------|
| 5            | rs134889   | LOC388906   | 22         | A         | T         | NaN                | NaN                | 4,06E-02       | 0            | 1,39E-05     | 2,42E-04     |
| 5            | rs134891   | LOC388906   | 22         | T         | C         | -4,33E+00          | 3,69E+00           | 3,35E-02       | 0            | 1,50E-05     | 2,22E-04     |
| 5            | rs134899   | LOC388906   | 22         | T         | G         | -4,38E+00          | 3,73E+00           | 3,35E-02       | 0            | 1,21E-05     | 1,91E-04     |
| 5            | rs134900   | LOC388906   | 22         | C         | G         | NaN                | NaN                | 3,76E-04       | 0            | 1,08E-06     | 4,25E-08     |
| 5            | rs134901   | LOC388906   | 22         | C         | T         | -4,40E+00          | 3,71E+00           | 3,35E-02       | 0            | 1,10E-05     | 2,09E-04     |
| 5            | rs134902   | LOC388906   | 22         | A         | G         | 4,86E+00           | -5,49E+00          | 4,70E-04       | 0            | 1,17E-06     | 4,09E-08     |
| 5            | rs134903   | LOC388906   | 22         | C         | A         | -4,43E+00          | 3,66E+00           | 4,06E-02       | 0            | 9,64E-06     | 2,51E-04     |
| 5            | rs80506    | LOC388906   | 22         | A         | T         | NaN                | NaN                | 5,87E-04       | 0            | 1,62E-06     | 6,09E-08     |
| 5            | rs134906   | LOC388906   | 22         | T         | C         | 4,68E+00           | -5,23E+00          | 1,14E-03       | 0            | 2,84E-06     | 1,66E-07     |

**eTable 3D. Loci with conjFDR<.10 associated with SCZ and RT**

| Locus | SNP        | Gene    | Chr | A1 | A2 | z-score SCZ | z-score RT | conjFDR  | prune | p SCZ    | p RT     |
|-------|------------|---------|-----|----|----|-------------|------------|----------|-------|----------|----------|
| 1     | rs11264211 | AGO4    | 1   | G  | A  | -3,40E+00   | -3,43E+00  | 8,57E-02 | 0     | 6,81E-04 | 6,02E-04 |
| 1     | rs12083902 | AGO4    | 1   | A  | G  | -3,45E+00   | -3,41E+00  | 8,57E-02 | 0     | 5,64E-04 | 6,60E-04 |
| 1     | rs727005   | AGO4    | 1   | G  | A  | -3,42E+00   | -3,40E+00  | 8,57E-02 | 0     | 6,29E-04 | 6,82E-04 |
| 1     | rs11264213 | EIF2C4  | 1   | G  | A  | -3,51E+00   | -3,45E+00  | 6,84E-02 | 1     | 4,44E-04 | 5,62E-04 |
| 1     | rs11263828 | EIF2C4  | 1   | C  | G  | NaN         | NaN        | 8,57E-02 | 0     | 6,19E-04 | 5,60E-04 |
| 2     | rs34464261 | KCNJ3   | 2   | G  | T  | 3,40E+00    | -3,49E+00  | 8,57E-02 | 0     | 6,73E-04 | 4,76E-04 |
| 2     | rs62176457 | KCNJ3   | 2   | T  | G  | 3,43E+00    | -3,55E+00  | 8,57E-02 | 0     | 6,09E-04 | 3,81E-04 |
| 2     | rs34829140 | KCNJ3   | 2   | A  | C  | 3,39E+00    | -3,51E+00  | 8,57E-02 | 0     | 6,93E-04 | 4,56E-04 |
| 2     | rs13004840 | KCNJ3   | 2   | T  | C  | 3,48E+00    | -3,37E+00  | 9,33E-02 | 0     | 5,00E-04 | 7,41E-04 |
| 2     | rs13000491 | KCNJ3   | 2   | C  | T  | 3,48E+00    | -3,37E+00  | 9,33E-02 | 0     | 4,96E-04 | 7,57E-04 |
| 2     | rs34643576 | KCNJ3   | 2   | G  | C  | NaN         | NaN        | 8,57E-02 | 0     | 5,78E-04 | 5,28E-04 |
| 2     | rs34578247 | KCNJ3   | 2   | C  | T  | 3,41E+00    | -3,48E+00  | 8,57E-02 | 0     | 6,42E-04 | 5,02E-04 |
| 2     | rs34003363 | KCNJ3   | 2   | A  | G  | 3,43E+00    | -3,47E+00  | 8,57E-02 | 0     | 6,00E-04 | 5,26E-04 |
| 2     | rs67338739 | KCNJ3   | 2   | C  | T  | 3,44E+00    | -3,61E+00  | 8,57E-02 | 0     | 5,84E-04 | 3,12E-04 |
| 2     | rs12993822 | KCNJ3   | 2   | G  | C  | NaN         | NaN        | 8,57E-02 | 0     | 5,84E-04 | 4,01E-04 |
| 2     | rs35204416 | KCNJ3   | 2   | G  | C  | NaN         | NaN        | 8,57E-02 | 0     | 5,86E-04 | 3,21E-04 |
| 2     | rs62174923 | KCNJ3   | 2   | C  | T  | 3,45E+00    | -3,62E+00  | 7,21E-02 | 1     | 5,58E-04 | 2,94E-04 |
| 2     | rs7593161  | KCNJ3   | 2   | G  | C  | NaN         | NaN        | 8,57E-02 | 0     | 5,85E-04 | 3,22E-04 |
| 2     | rs62174925 | KCNJ3   | 2   | T  | A  | NaN         | NaN        | 8,57E-02 | 0     | 5,85E-04 | 3,28E-04 |
| 2     | rs62174926 | KCNJ3   | 2   | A  | G  | 3,48E+00    | -3,60E+00  | 7,21E-02 | 0     | 5,03E-04 | 3,22E-04 |
| 2     | rs13013475 | KCNJ3   | 2   | A  | C  | 3,42E+00    | -3,56E+00  | 8,57E-02 | 0     | 6,19E-04 | 3,70E-04 |
| 2     | rs35072026 | KCNJ3   | 2   | C  | T  | 3,39E+00    | -3,60E+00  | 8,57E-02 | 0     | 7,07E-04 | 3,13E-04 |
| 3     | rs13020196 | SPATS2L | 2   | T  | G  | 3,51E+00    | 5,02E+00   | 7,21E-02 | 0     | 4,56E-04 | 5,19E-07 |
| 3     | rs1653301  | SPATS2L | 2   | A  | G  | 3,46E+00    | 4,88E+00   | 7,21E-02 | 0     | 5,47E-04 | 1,05E-06 |
| 3     | rs10445790 | SPATS2L | 2   | C  | T  | 3,43E+00    | 4,85E+00   | 8,57E-02 | 0     | 5,99E-04 | 1,21E-06 |
| 3     | rs13035874 | SPATS2L | 2   | A  | G  | 4,24E+00    | 4,97E+00   | 4,76E-03 | 0     | 2,19E-05 | 6,56E-07 |
| 3     | rs1367858  | SPATS2L | 2   | T  | C  | 5,01E+00    | 4,59E+00   | 8,97E-04 | 0     | 5,49E-07 | 4,36E-06 |
| 3     | rs4673905  | SPATS2L | 2   | G  | A  | 4,48E+00    | 4,53E+00   | 2,02E-03 | 0     | 7,42E-06 | 5,83E-06 |
| 3     | rs6435048  | SPATS2L | 2   | T  | C  | 4,84E+00    | 4,71E+00   | 5,65E-04 | 1     | 1,31E-06 | 2,48E-06 |
| 3     | rs3769484  | SPATS2L | 2   | T  | C  | 4,85E+00    | 4,68E+00   | 7,12E-04 | 0     | 1,26E-06 | 2,82E-06 |

| Locus | SNP         | Gene    | Chr | A1 | A2 | z-score SCZ | z-score RT | conjFDR  | prune | p SCZ    | p RT     |
|-------|-------------|---------|-----|----|----|-------------|------------|----------|-------|----------|----------|
| 3     | rs3769483   | SPATS2L | 2   | G  | A  | 4,85E+00    | 4,70E+00   | 5,65E-04 | 0     | 1,26E-06 | 2,60E-06 |
| 3     | rs3769482   | SPATS2L | 2   | G  | C  | NaN         | NaN        | 7,12E-04 | 0     | 1,25E-06 | 2,84E-06 |
| 3     | rs1347551   | SPATS2L | 2   | T  | C  | 4,78E+00    | 4,60E+00   | 8,97E-04 | 0     | 1,76E-06 | 4,27E-06 |
| 3     | rs3769472   | SPATS2L | 2   | A  | G  | 4,82E+00    | 4,59E+00   | 8,97E-04 | 0     | 1,46E-06 | 4,38E-06 |
| 3     | rs2033804   | SPATS2L | 2   | T  | A  | NaN         | NaN        | 6,74E-03 | 0     | 1,09E-05 | 2,93E-05 |
| 3     | rs1975583   | SPATS2L | 2   | C  | A  | 4,52E+00    | 4,23E+00   | 5,43E-03 | 0     | 6,29E-06 | 2,38E-05 |
| 3     | rs1369841   | SPATS2L | 2   | G  | A  | 4,67E+00    | 4,14E+00   | 6,74E-03 | 0     | 3,07E-06 | 3,44E-05 |
| 3     | rs6743157   | SPATS2L | 2   | T  | C  | 4,67E+00    | 4,19E+00   | 5,43E-03 | 0     | 3,01E-06 | 2,79E-05 |
| 3     | rs35417285  | SPATS2L | 2   | C  | T  | 4,58E+00    | 4,19E+00   | 6,74E-03 | 0     | 4,70E-06 | 2,84E-05 |
| 3     | rs3856513   | SPATS2L | 2   | A  | G  | 4,64E+00    | 4,17E+00   | 6,74E-03 | 0     | 3,40E-06 | 3,00E-05 |
| 3     | rs3769456   | SPATS2L | 2   | T  | C  | 4,67E+00    | 4,13E+00   | 8,36E-03 | 0     | 3,02E-06 | 3,59E-05 |
| 3     | rs994280    | SPATS2L | 2   | G  | A  | 4,34E+00    | 4,23E+00   | 5,43E-03 | 0     | 1,44E-05 | 2,35E-05 |
| 3     | rs12990174  | SPATS2L | 2   | A  | G  | 4,61E+00    | 4,18E+00   | 6,74E-03 | 0     | 4,08E-06 | 2,94E-05 |
| 3     | rs3754797   | SPATS2L | 2   | A  | G  | 4,66E+00    | 4,24E+00   | 4,36E-03 | 0     | 3,10E-06 | 2,23E-05 |
| 3     | rs6708345   | SPATS2L | 2   | C  | A  | 4,70E+00    | 3,50E+00   | 6,84E-02 | 0     | 2,57E-06 | 4,58E-04 |
| 4     | rs832192    | SCA7    | 3   | T  | C  | 3,42E+00    | 3,35E+00   | 9,33E-02 | 1     | 6,28E-04 | 8,16E-04 |
| 5     | rs2764264   | FOXO3   | 6   | C  | T  | 4,36E+00    | 3,35E+00   | 9,33E-02 | 0     | 1,32E-05 | 8,23E-04 |
| 5     | rs13217795  | FOXO3   | 6   | C  | T  | 4,36E+00    | 3,42E+00   | 8,01E-02 | 1     | 1,32E-05 | 6,34E-04 |
| 5     | rs4946932   | FOXO3   | 6   | A  | C  | 4,33E+00    | 3,35E+00   | 9,33E-02 | 0     | 1,48E-05 | 8,11E-04 |
| 5     | rs9398171   | FOXO3   | 6   | C  | T  | 4,57E+00    | 3,38E+00   | 9,33E-02 | 0     | 4,83E-06 | 7,37E-04 |
| 5     | rs111727905 | FOXO3   | 6   | G  | A  | 4,44E+00    | 3,39E+00   | 8,01E-02 | 0     | 8,95E-06 | 6,87E-04 |
| 6     | rs7857165   | PHF2    | 9   | A  | T  | NaN         | NaN        | 3,52E-02 | 1     | 2,16E-04 | 3,00E-05 |
| 6     | rs10119832  | PHF2    | 9   | A  | G  | 3,41E+00    | 4,14E+00   | 8,57E-02 | 0     | 6,56E-04 | 3,54E-05 |
| 6     | rs55934002  | PHF2    | 9   | T  | C  | 3,43E+00    | 4,19E+00   | 8,57E-02 | 0     | 6,02E-04 | 2,77E-05 |
| 7     | rs1044796   | CREB3L1 | 11  | T  | C  | 4,40E+00    | 4,14E+00   | 6,74E-03 | 0     | 1,07E-05 | 3,42E-05 |
| 7     | rs12285419  | CREB3L1 | 11  | A  | C  | 4,68E+00    | 4,15E+00   | 6,74E-03 | 0     | 2,85E-06 | 3,26E-05 |
| 7     | rs11038864  | DGKZ    | 11  | A  | G  | 4,38E+00    | 3,51E+00   | 6,84E-02 | 0     | 1,16E-05 | 4,53E-04 |
| 7     | rs61882674  | DGKZ    | 11  | G  | C  | NaN         | NaN        | 2,80E-03 | 0     | 1,69E-06 | 1,23E-05 |
| 7     | rs61882678  | DGKZ    | 11  | T  | A  | NaN         | NaN        | 2,80E-03 | 0     | 1,22E-06 | 1,28E-05 |
| 7     | rs61882679  | DGKZ    | 11  | T  | G  | 3,45E+00    | 4,03E+00   | 7,21E-02 | 0     | 5,60E-04 | 5,68E-05 |
| 7     | rs876701    | DGKZ    | 11  | G  | A  | 4,99E+00    | 4,38E+00   | 2,80E-03 | 0     | 6,12E-07 | 1,21E-05 |
| 7     | rs7951870   | DGKZ    | 11  | C  | T  | 5,25E+00    | 4,37E+00   | 2,80E-03 | 0     | 1,56E-07 | 1,22E-05 |

| Locus | SNP         | Gene   | Chr | A1 | A2 | z-score SCZ | z-score RT | conjFDR  | prune | p SCZ    | p RT     |
|-------|-------------|--------|-----|----|----|-------------|------------|----------|-------|----------|----------|
| 7     | rs61882682  | DGKZ   | 11  | C  | A  | 4,92E+00    | 4,35E+00   | 2,80E-03 | 0     | 8,58E-07 | 1,34E-05 |
| 7     | rs61882683  | DGKZ   | 11  | A  | G  | 4,89E+00    | 4,30E+00   | 3,50E-03 | 0     | 1,03E-06 | 1,71E-05 |
| 7     | rs59319338  | DGKZ   | 11  | T  | C  | 4,76E+00    | 4,30E+00   | 3,50E-03 | 0     | 1,92E-06 | 1,67E-05 |
| 7     | rs12577142  | DGKZ   | 11  | C  | T  | 5,13E+00    | 4,44E+00   | 1,78E-03 | 1     | 2,82E-07 | 8,86E-06 |
| 7     | rs12576115  | DGKZ   | 11  | A  | G  | 4,94E+00    | 4,39E+00   | 2,23E-03 | 0     | 7,77E-07 | 1,11E-05 |
| 7     | rs61882686  | DGKZ   | 11  | A  | C  | 3,47E+00    | 3,95E+00   | 7,21E-02 | 0     | 5,21E-04 | 7,77E-05 |
| 7     | rs12575519  | DGKZ   | 11  | G  | T  | 5,08E+00    | 4,36E+00   | 2,80E-03 | 0     | 3,71E-07 | 1,27E-05 |
| 7     | rs3740977   | DGKZ   | 11  | C  | T  | 4,85E+00    | 4,34E+00   | 3,50E-03 | 0     | 1,21E-06 | 1,41E-05 |
| 7     | rs7936413   | DGKZ   | 11  | C  | T  | 5,09E+00    | 4,36E+00   | 2,80E-03 | 0     | 3,65E-07 | 1,29E-05 |
| 7     | rs2046768   | DGKZ   | 11  | C  | T  | 5,08E+00    | 4,46E+00   | 1,78E-03 | 0     | 3,74E-07 | 8,08E-06 |
| 7     | rs3740974   | DGKZ   | 11  | C  | A  | 5,03E+00    | 4,35E+00   | 2,80E-03 | 0     | 4,92E-07 | 1,36E-05 |
| 7     | rs34406563  | DGKZ   | 11  | C  | T  | 4,67E+00    | 3,63E+00   | 4,10E-02 | 0     | 2,96E-06 | 2,79E-04 |
| 7     | rs2279465   | DGKZ   | 11  | C  | T  | 5,03E+00    | 4,36E+00   | 2,80E-03 | 0     | 5,00E-07 | 1,28E-05 |
| 7     | rs35324223  | MDK    | 11  | G  | A  | 5,10E+00    | 4,35E+00   | 2,80E-03 | 0     | 3,31E-07 | 1,38E-05 |
| 7     | rs2067482   | CHRM4  | 11  | A  | G  | 4,77E+00    | 4,14E+00   | 6,74E-03 | 0     | 1,82E-06 | 3,43E-05 |
| 7     | rs7946705   | AMBRA1 | 11  | A  | G  | 4,74E+00    | 4,18E+00   | 6,74E-03 | 0     | 2,10E-06 | 2,89E-05 |
| 7     | rs12574668  | AMBRA1 | 11  | A  | C  | 5,00E+00    | 4,21E+00   | 5,43E-03 | 0     | 5,67E-07 | 2,52E-05 |
| 7     | rs111449880 | AMBRA1 | 11  | A  | G  | 4,82E+00    | 4,18E+00   | 6,74E-03 | 0     | 1,40E-06 | 2,87E-05 |
| 7     | rs61882691  | AMBRA1 | 11  | A  | C  | 4,73E+00    | 4,15E+00   | 6,74E-03 | 0     | 2,19E-06 | 3,31E-05 |
| 7     | rs12283172  | AMBRA1 | 11  | T  | C  | 4,64E+00    | 4,15E+00   | 6,74E-03 | 0     | 3,53E-06 | 3,26E-05 |
| 7     | rs61882701  | AMBRA1 | 11  | A  | G  | 4,72E+00    | 4,15E+00   | 6,74E-03 | 0     | 2,40E-06 | 3,30E-05 |
| 7     | rs6485682   | AMBRA1 | 11  | C  | A  | 4,99E+00    | 4,17E+00   | 6,74E-03 | 0     | 6,06E-07 | 3,09E-05 |
| 7     | rs61882702  | AMBRA1 | 11  | A  | G  | 4,80E+00    | 4,14E+00   | 6,74E-03 | 0     | 1,62E-06 | 3,52E-05 |
| 7     | rs16938506  | AMBRA1 | 11  | C  | A  | 4,97E+00    | 4,18E+00   | 6,74E-03 | 0     | 6,60E-07 | 2,98E-05 |
| 7     | rs2291487   | AMBRA1 | 11  | T  | C  | 4,74E+00    | 4,15E+00   | 6,74E-03 | 0     | 2,11E-06 | 3,36E-05 |
| 7     | rs75748389  | AMBRA1 | 11  | G  | C  | NaN         | NaN        | 6,74E-03 | 0     | 2,18E-06 | 2,85E-05 |
| 7     | rs2864076   | AMBRA1 | 11  | T  | C  | 5,00E+00    | 4,19E+00   | 5,43E-03 | 0     | 5,80E-07 | 2,80E-05 |
| 7     | rs61882706  | AMBRA1 | 11  | A  | G  | 4,75E+00    | 4,16E+00   | 6,74E-03 | 0     | 2,02E-06 | 3,16E-05 |
| 7     | rs2171668   | AMBRA1 | 11  | C  | A  | 5,02E+00    | 4,18E+00   | 6,74E-03 | 0     | 5,06E-07 | 2,89E-05 |
| 7     | rs2864072   | AMBRA1 | 11  | C  | A  | 4,79E+00    | 4,14E+00   | 6,74E-03 | 0     | 1,70E-06 | 3,53E-05 |
| 7     | rs7951579   | AMBRA1 | 11  | A  | G  | 5,13E+00    | 4,16E+00   | 6,74E-03 | 0     | 2,97E-07 | 3,24E-05 |
| 7     | rs11038897  | AMBRA1 | 11  | T  | C  | 5,02E+00    | 4,16E+00   | 6,74E-03 | 0     | 5,06E-07 | 3,14E-05 |

| Locus | SNP         | Gene   | Chr | A1 | A2 | z-score SCZ | z-score RT | conjFDR  | prune | p SCZ    | p RT     |
|-------|-------------|--------|-----|----|----|-------------|------------|----------|-------|----------|----------|
| 7     | rs61882709  | AMBRA1 | 11  | A  | G  | 5,02E+00    | 4,16E+00   | 6,74E-03 | 0     | 5,05E-07 | 3,17E-05 |
| 7     | rs61882710  | AMBRA1 | 11  | A  | G  | 4,74E+00    | 4,15E+00   | 6,74E-03 | 0     | 2,10E-06 | 3,33E-05 |
| 7     | rs61882711  | AMBRA1 | 11  | T  | C  | 4,75E+00    | 4,11E+00   | 8,36E-03 | 0     | 2,03E-06 | 3,91E-05 |
| 7     | rs80031726  | AMBRA1 | 11  | C  | T  | 4,80E+00    | 4,15E+00   | 6,74E-03 | 0     | 1,61E-06 | 3,30E-05 |
| 7     | rs61882712  | AMBRA1 | 11  | C  | T  | 4,75E+00    | 4,13E+00   | 8,36E-03 | 0     | 2,08E-06 | 3,60E-05 |
| 7     | rs7930103   | AMBRA1 | 11  | T  | C  | 4,74E+00    | 4,13E+00   | 8,36E-03 | 0     | 2,11E-06 | 3,59E-05 |
| 7     | rs1472001   | AMBRA1 | 11  | A  | G  | 4,74E+00    | 4,13E+00   | 8,36E-03 | 0     | 2,14E-06 | 3,59E-05 |
| 7     | rs79078082  | AMBRA1 | 11  | G  | A  | 3,39E+00    | 3,73E+00   | 8,57E-02 | 0     | 6,94E-04 | 1,95E-04 |
| 7     | rs12574250  | AMBRA1 | 11  | A  | G  | 4,62E+00    | 4,10E+00   | 8,36E-03 | 0     | 3,76E-06 | 4,09E-05 |
| 7     | rs11038900  | AMBRA1 | 11  | G  | A  | 5,06E+00    | 4,17E+00   | 6,74E-03 | 0     | 4,22E-07 | 3,07E-05 |
| 7     | rs7130141   | AMBRA1 | 11  | T  | C  | 4,99E+00    | 4,14E+00   | 6,74E-03 | 0     | 5,96E-07 | 3,43E-05 |
| 7     | rs58147945  | AMBRA1 | 11  | G  | C  | NaN         | NaN        | 6,74E-03 | 0     | 5,34E-07 | 3,40E-05 |
| 7     | rs1489192   | AMBRA1 | 11  | C  | T  | 5,02E+00    | 4,15E+00   | 6,74E-03 | 0     | 5,04E-07 | 3,27E-05 |
| 7     | rs7112229   | AMBRA1 | 11  | T  | C  | 4,75E+00    | 4,13E+00   | 8,36E-03 | 0     | 2,06E-06 | 3,57E-05 |
| 7     | rs12578042  | AMBRA1 | 11  | G  | C  | NaN         | NaN        | 6,74E-03 | 0     | 5,00E-07 | 3,47E-05 |
| 7     | rs3802888   | AMBRA1 | 11  | G  | A  | 5,04E+00    | 4,16E+00   | 6,74E-03 | 0     | 4,70E-07 | 3,24E-05 |
| 7     | rs2902858   | AMBRA1 | 11  | C  | T  | 4,99E+00    | 4,18E+00   | 6,74E-03 | 0     | 6,15E-07 | 2,93E-05 |
| 7     | rs12576359  | AMBRA1 | 11  | G  | T  | 4,72E+00    | 4,14E+00   | 6,74E-03 | 0     | 2,39E-06 | 3,47E-05 |
| 7     | rs10838602  | AMBRA1 | 11  | A  | G  | 4,72E+00    | 4,15E+00   | 6,74E-03 | 0     | 2,39E-06 | 3,33E-05 |
| 7     | rs11038906  | AMBRA1 | 11  | A  | G  | 5,02E+00    | 4,15E+00   | 6,74E-03 | 0     | 5,15E-07 | 3,38E-05 |
| 7     | rs61882720  | AMBRA1 | 11  | A  | C  | 4,72E+00    | 4,07E+00   | 1,03E-02 | 0     | 2,37E-06 | 4,79E-05 |
| 7     | rs12272795  | AMBRA1 | 11  | G  | A  | 4,92E+00    | 4,09E+00   | 8,36E-03 | 0     | 8,71E-07 | 4,35E-05 |
| 7     | rs7932866   | AMBRA1 | 11  | G  | A  | 4,64E+00    | 4,11E+00   | 8,36E-03 | 0     | 3,44E-06 | 3,88E-05 |
| 7     | rs61882743  | AMBRA1 | 11  | G  | C  | NaN         | NaN        | 1,03E-02 | 0     | 2,15E-07 | 4,92E-05 |
| 7     | rs10160701  | AMBRA1 | 11  | T  | C  | 5,07E+00    | 4,10E+00   | 8,36E-03 | 0     | 3,93E-07 | 4,21E-05 |
| 7     | rs112419908 | AMBRA1 | 11  | A  | G  | 4,72E+00    | 4,08E+00   | 1,03E-02 | 0     | 2,39E-06 | 4,53E-05 |
| 7     | rs11819869  | AMBRA1 | 11  | T  | C  | 5,04E+00    | 4,09E+00   | 8,36E-03 | 0     | 4,71E-07 | 4,32E-05 |
| 7     | rs11038914  | AMBRA1 | 11  | T  | C  | 5,09E+00    | 4,08E+00   | 8,36E-03 | 0     | 3,66E-07 | 4,45E-05 |
| 7     | rs61882746  | AMBRA1 | 11  | T  | C  | 5,04E+00    | 4,11E+00   | 8,36E-03 | 0     | 4,56E-07 | 3,98E-05 |
| 7     | rs57535407  | AMBRA1 | 11  | C  | T  | 4,81E+00    | 4,09E+00   | 8,36E-03 | 0     | 1,53E-06 | 4,34E-05 |
| 7     | rs12576317  | AMBRA1 | 11  | A  | G  | 4,82E+00    | 4,15E+00   | 6,74E-03 | 0     | 1,46E-06 | 3,36E-05 |
| 7     | rs12573978  | AMBRA1 | 11  | G  | A  | 4,78E+00    | 4,07E+00   | 1,03E-02 | 0     | 1,71E-06 | 4,74E-05 |



| Locus | SNP         | Gene     | Chr | A1 | A2 | z-score SCZ | z-score RT | conjFDR  | prune | p SCZ    | p RT     |
|-------|-------------|----------|-----|----|----|-------------|------------|----------|-------|----------|----------|
| 7     | rs61882748  | AMBRA1   | 11  | G  | C  | NaN         | NaN        | 8,36E-03 | 0     | 1,42E-06 | 4,25E-05 |
| 7     | rs7127529   | AMBRA1   | 11  | C  | A  | 5,03E+00    | 4,12E+00   | 8,36E-03 | 0     | 4,98E-07 | 3,84E-05 |
| 7     | rs61882750  | AMBRA1   | 11  | G  | T  | 5,02E+00    | 4,11E+00   | 8,36E-03 | 0     | 5,07E-07 | 3,99E-05 |
| 7     | rs11038919  | AMBRA1   | 11  | G  | A  | 4,69E+00    | 4,02E+00   | 1,27E-02 | 0     | 2,68E-06 | 5,74E-05 |
| 7     | rs112705011 | AMBRA1   | 11  | T  | C  | 4,63E+00    | 4,09E+00   | 8,36E-03 | 0     | 3,62E-06 | 4,39E-05 |
| 7     | rs79445785  | AMBRA1   | 11  | T  | C  | 4,62E+00    | 4,08E+00   | 1,03E-02 | 0     | 3,82E-06 | 4,50E-05 |
| 7     | rs7481312   | AMBRA1   | 11  | T  | C  | 4,68E+00    | 4,08E+00   | 8,36E-03 | 0     | 2,81E-06 | 4,45E-05 |
| 7     | rs11038927  | AMBRA1   | 11  | C  | G  | NaN         | NaN        | 8,36E-03 | 0     | 6,30E-07 | 3,96E-05 |
| 7     | rs139362284 | AMBRA1   | 11  | T  | C  | 4,68E+00    | 4,14E+00   | 6,74E-03 | 0     | 2,85E-06 | 3,49E-05 |
| 7     | rs12295266  | AMBRA1   | 11  | T  | A  | NaN         | NaN        | 1,03E-02 | 0     | 2,98E-06 | 4,67E-05 |
| 7     | rs61882756  | AMBRA1   | 11  | T  | C  | 4,33E+00    | 4,06E+00   | 1,03E-02 | 0     | 1,49E-05 | 4,93E-05 |
| 7     | rs61882757  | AMBRA1   | 11  | A  | G  | 4,63E+00    | 4,11E+00   | 8,36E-03 | 0     | 3,72E-06 | 3,93E-05 |
| 7     | rs61882758  | AMBRA1   | 11  | G  | A  | 4,85E+00    | 4,16E+00   | 6,74E-03 | 0     | 1,25E-06 | 3,15E-05 |
| 7     | rs73449983  | AMBRA1   | 11  | G  | A  | 4,66E+00    | 4,11E+00   | 8,36E-03 | 0     | 3,14E-06 | 3,98E-05 |
| 7     | rs7125907   | HARBI1   | 11  | T  | C  | 4,62E+00    | 4,06E+00   | 1,03E-02 | 0     | 3,91E-06 | 5,00E-05 |
| 7     | rs75966121  | HARBI1   | 11  | G  | T  | 4,65E+00    | 4,18E+00   | 6,74E-03 | 0     | 3,37E-06 | 2,93E-05 |
| 7     | rs55661562  | HARBI1   | 11  | C  | A  | 4,68E+00    | 4,06E+00   | 1,03E-02 | 0     | 2,81E-06 | 4,98E-05 |
| 7     | rs35623865  | HARBI1   | 11  | T  | C  | 4,96E+00    | 4,15E+00   | 6,74E-03 | 0     | 7,21E-07 | 3,36E-05 |
| 7     | rs61884262  | HARBI1   | 11  | A  | G  | 4,75E+00    | 4,03E+00   | 1,27E-02 | 0     | 2,03E-06 | 5,62E-05 |
| 7     | rs6485685   | HARBI1   | 11  | A  | G  | 4,62E+00    | 4,06E+00   | 1,03E-02 | 0     | 3,75E-06 | 4,95E-05 |
| 7     | rs55657382  | HARBI1   | 11  | A  | T  | NaN         | NaN        | 1,03E-02 | 0     | 3,41E-06 | 4,95E-05 |
| 7     | rs7924401   | HARBI1   | 11  | T  | A  | NaN         | NaN        | 8,36E-03 | 0     | 8,74E-07 | 3,88E-05 |
| 7     | rs61884264  | KIAA0652 | 11  | A  | G  | 4,97E+00    | 4,09E+00   | 8,36E-03 | 0     | 6,53E-07 | 4,35E-05 |
| 7     | rs7484002   | ATG13    | 11  | G  | A  | 4,67E+00    | 4,07E+00   | 1,03E-02 | 0     | 3,03E-06 | 4,77E-05 |
| 7     | rs79317378  | KIAA0652 | 11  | C  | T  | 4,64E+00    | 4,05E+00   | 1,03E-02 | 0     | 3,49E-06 | 5,16E-05 |
| 7     | rs12292425  | ATG13    | 11  | G  | T  | 4,66E+00    | 4,07E+00   | 1,03E-02 | 0     | 3,11E-06 | 4,62E-05 |
| 7     | rs7122039   | ATG13    | 11  | C  | A  | 4,97E+00    | 4,05E+00   | 1,03E-02 | 0     | 6,60E-07 | 5,03E-05 |
| 7     | rs7108770   | KIAA0652 | 11  | A  | G  | 5,10E+00    | 4,12E+00   | 8,36E-03 | 0     | 3,36E-07 | 3,76E-05 |
| 7     | rs60722866  | KIAA0652 | 11  | C  | T  | 5,01E+00    | 4,10E+00   | 8,36E-03 | 0     | 5,55E-07 | 4,05E-05 |
| 7     | rs60932698  | KIAA0652 | 11  | G  | A  | 4,66E+00    | 4,06E+00   | 1,03E-02 | 0     | 3,12E-06 | 4,86E-05 |
| 7     | rs61884270  | KIAA0652 | 11  | T  | G  | 3,43E+00    | 3,64E+00   | 8,57E-02 | 0     | 6,09E-04 | 2,68E-04 |
| 7     | rs61884271  | KIAA0652 | 11  | C  | T  | 4,67E+00    | 4,05E+00   | 1,03E-02 | 0     | 3,04E-06 | 5,14E-05 |

| Locus | SNP        | Gene     | Chr | A1 | A2 | z-score SCZ | z-score RT | conjFDR  | prune | p SCZ    | p RT     |
|-------|------------|----------|-----|----|----|-------------|------------|----------|-------|----------|----------|
| 7     | rs7128092  | KIAA0652 | 11  | A  | T  | NaN         | NaN        | 1,03E-02 | 0     | 5,45E-06 | 4,69E-05 |
| 7     | rs7126316  | KIAA0652 | 11  | A  | T  | NaN         | NaN        | 1,03E-02 | 0     | 3,38E-06 | 4,74E-05 |
| 7     | rs7126343  | KIAA0652 | 11  | C  | T  | 4,54E+00    | 4,07E+00   | 1,03E-02 | 0     | 5,58E-06 | 4,76E-05 |
| 7     | rs61884273 | KIAA0652 | 11  | G  | T  | 4,63E+00    | 4,09E+00   | 8,36E-03 | 0     | 3,73E-06 | 4,40E-05 |
| 7     | rs61884274 | KIAA0652 | 11  | G  | A  | 4,63E+00    | 4,07E+00   | 1,03E-02 | 0     | 3,64E-06 | 4,70E-05 |
| 7     | rs4307676  | KIAA0652 | 11  | A  | G  | 4,63E+00    | 4,07E+00   | 1,03E-02 | 0     | 3,65E-06 | 4,67E-05 |
| 7     | rs7109698  | ATG13    | 11  | T  | C  | 4,84E+00    | 4,08E+00   | 8,36E-03 | 0     | 1,30E-06 | 4,43E-05 |
| 7     | rs55896955 | KIAA0652 | 11  | G  | C  | NaN         | NaN        | 1,03E-02 | 0     | 3,51E-06 | 4,98E-05 |
| 7     | rs61884292 | KIAA0652 | 11  | T  | A  | NaN         | NaN        | 1,03E-02 | 0     | 3,37E-06 | 5,06E-05 |
| 7     | rs4423142  | KIAA0652 | 11  | G  | T  | 4,65E+00    | 4,04E+00   | 1,03E-02 | 0     | 3,36E-06 | 5,25E-05 |
| 7     | rs4606447  | ATG13    | 11  | A  | G  | 3,49E+00    | 3,43E+00   | 8,01E-02 | 0     | 4,92E-04 | 5,95E-04 |
| 7     | rs61884295 | KIAA0652 | 11  | A  | G  | 4,36E+00    | 4,03E+00   | 1,03E-02 | 0     | 1,30E-05 | 5,59E-05 |
| 7     | rs56349329 | KIAA0652 | 11  | A  | G  | 4,38E+00    | 4,10E+00   | 8,36E-03 | 0     | 1,19E-05 | 4,21E-05 |
| 7     | rs57744667 | KIAA0652 | 11  | T  | C  | 4,41E+00    | 4,05E+00   | 1,03E-02 | 0     | 1,02E-05 | 5,08E-05 |
| 7     | rs4319473  | ARHGAP1  | 11  | A  | G  | 4,31E+00    | 4,07E+00   | 1,03E-02 | 0     | 1,60E-05 | 4,62E-05 |
| 7     | rs12574259 | ARHGAP1  | 11  | G  | A  | 4,50E+00    | 4,03E+00   | 1,03E-02 | 0     | 6,69E-06 | 5,61E-05 |
| 7     | rs79443985 | ARHGAP1  | 11  | C  | T  | 4,50E+00    | 3,99E+00   | 1,27E-02 | 0     | 6,64E-06 | 6,52E-05 |
| 7     | rs10838613 | ARHGAP1  | 11  | A  | C  | 4,34E+00    | 4,21E+00   | 5,43E-03 | 0     | 1,45E-05 | 2,54E-05 |
| 7     | rs7926389  | ARHGAP1  | 11  | G  | A  | 4,65E+00    | 4,00E+00   | 1,27E-02 | 0     | 3,40E-06 | 6,43E-05 |
| 7     | rs57739486 | ZNF408   | 11  | T  | C  | 4,49E+00    | 4,03E+00   | 1,03E-02 | 0     | 6,96E-06 | 5,59E-05 |
| 7     | rs12574918 | ZNF408   | 11  | C  | G  | NaN         | NaN        | 1,27E-02 | 0     | 6,88E-06 | 6,19E-05 |
| 7     | rs11038973 | ZNF408   | 11  | C  | G  | NaN         | NaN        | 1,03E-02 | 0     | 8,32E-06 | 5,60E-05 |
| 7     | rs11038974 | ZNF408   | 11  | T  | G  | 4,45E+00    | 4,03E+00   | 1,03E-02 | 0     | 8,47E-06 | 5,60E-05 |
| 7     | rs61884301 | ZNF408   | 11  | T  | G  | 4,48E+00    | 4,00E+00   | 1,27E-02 | 0     | 7,39E-06 | 6,23E-05 |
| 7     | rs79175663 | ZNF408   | 11  | T  | C  | 4,49E+00    | 3,96E+00   | 1,56E-02 | 0     | 6,97E-06 | 7,57E-05 |
| 7     | rs61884307 | F2       | 11  | C  | G  | NaN         | NaN        | 7,21E-02 | 0     | 4,98E-04 | 2,85E-04 |
| 7     | rs3136487  | F2       | 11  | G  | A  | 3,41E+00    | 3,81E+00   | 8,57E-02 | 0     | 6,43E-04 | 1,37E-04 |
| 7     | rs11038985 | CKAP5    | 11  | G  | T  | 3,60E+00    | 3,76E+00   | 5,07E-02 | 0     | 3,24E-04 | 1,67E-04 |
| 7     | rs4500447  | CKAP5    | 11  | G  | A  | 3,57E+00    | 3,76E+00   | 5,07E-02 | 0     | 3,54E-04 | 1,69E-04 |
| 7     | rs10466476 | CKAP5    | 11  | T  | A  | NaN         | NaN        | 6,05E-02 | 0     | 3,96E-04 | 1,76E-04 |
| 7     | rs10466477 | CKAP5    | 11  | A  | C  | 3,57E+00    | 3,76E+00   | 5,07E-02 | 0     | 3,54E-04 | 1,71E-04 |
| 7     | rs7928445  | CKAP5    | 11  | C  | A  | 3,58E+00    | 3,76E+00   | 5,07E-02 | 0     | 3,41E-04 | 1,71E-04 |

| Locus | SNP        | Gene      | Chr | A1 | A2 | z-score SCZ | z-score RT | conjFDR  | prune | p SCZ    | p RT     |
|-------|------------|-----------|-----|----|----|-------------|------------|----------|-------|----------|----------|
| 7     | rs11038987 | CKAP5     | 11  | T  | A  | NaN         | NaN        | 5,07E-02 | 0     | 3,49E-04 | 1,75E-04 |
| 7     | rs7947517  | CKAP5     | 11  | G  | A  | 3,56E+00    | 3,76E+00   | 6,05E-02 | 0     | 3,67E-04 | 1,70E-04 |
| 7     | rs7111811  | CKAP5     | 11  | C  | A  | 3,68E+00    | 3,76E+00   | 4,23E-02 | 0     | 2,32E-04 | 1,70E-04 |
| 7     | rs61897303 | CKAP5     | 11  | G  | A  | 3,56E+00    | 3,76E+00   | 6,05E-02 | 0     | 3,73E-04 | 1,67E-04 |
| 7     | rs57485117 | CKAP5     | 11  | G  | C  | NaN         | NaN        | 6,05E-02 | 0     | 3,73E-04 | 1,45E-04 |
| 7     | rs11822959 | CKAP5     | 11  | T  | C  | 3,65E+00    | 3,74E+00   | 4,23E-02 | 0     | 2,61E-04 | 1,83E-04 |
| 7     | rs7105052  | CKAP5     | 11  | C  | T  | 3,49E+00    | 3,74E+00   | 7,21E-02 | 0     | 4,84E-04 | 1,83E-04 |
| 7     | rs61897304 | CKAP5     | 11  | G  | A  | 3,56E+00    | 3,78E+00   | 6,05E-02 | 0     | 3,67E-04 | 1,59E-04 |
| 7     | rs9735937  | CKAP5     | 11  | A  | G  | 3,61E+00    | 3,77E+00   | 5,07E-02 | 0     | 3,01E-04 | 1,63E-04 |
| 7     | rs73456126 | CKAP5     | 11  | G  | A  | 3,58E+00    | 3,77E+00   | 5,07E-02 | 0     | 3,39E-04 | 1,63E-04 |
| 7     | rs56311746 | CKAP5     | 11  | T  | A  | NaN         | NaN        | 5,07E-02 | 0     | 3,53E-04 | 1,59E-04 |
| 7     | rs7118097  | CKAP5     | 11  | G  | A  | 3,60E+00    | 3,77E+00   | 5,07E-02 | 0     | 3,18E-04 | 1,66E-04 |
| 7     | rs7111760  | LRP4      | 11  | C  | T  | 3,58E+00    | 3,76E+00   | 5,07E-02 | 0     | 3,38E-04 | 1,69E-04 |
| 7     | rs7129622  | LRP4      | 11  | G  | A  | 3,60E+00    | 3,76E+00   | 5,07E-02 | 0     | 3,16E-04 | 1,73E-04 |
| 7     | rs7115986  | LRP4      | 11  | A  | T  | NaN         | NaN        | 5,07E-02 | 0     | 3,23E-04 | 1,67E-04 |
| 7     | rs7123729  | CKAP5     | 11  | C  | T  | 3,58E+00    | 3,77E+00   | 5,07E-02 | 0     | 3,38E-04 | 1,66E-04 |
| 7     | rs7108147  | LRP4      | 11  | A  | G  | 3,58E+00    | 3,75E+00   | 5,07E-02 | 0     | 3,45E-04 | 1,74E-04 |
| 7     | rs7102474  | CKAP5     | 11  | C  | T  | 3,58E+00    | 3,76E+00   | 5,07E-02 | 0     | 3,43E-04 | 1,69E-04 |
| 7     | rs4128315  | LRP4      | 11  | C  | T  | 3,59E+00    | 3,77E+00   | 5,07E-02 | 0     | 3,35E-04 | 1,66E-04 |
| 7     | rs7105217  | CKAP5     | 11  | A  | T  | NaN         | NaN        | 5,07E-02 | 0     | 3,46E-04 | 1,66E-04 |
| 7     | rs7106323  | LRP4      | 11  | A  | C  | 3,58E+00    | 3,77E+00   | 5,07E-02 | 0     | 3,49E-04 | 1,62E-04 |
| 7     | rs59197251 | CKAP5     | 11  | T  | C  | 3,57E+00    | 3,77E+00   | 5,07E-02 | 0     | 3,52E-04 | 1,66E-04 |
| 7     | rs12287376 | CKAP5     | 11  | T  | C  | 3,57E+00    | 3,75E+00   | 6,05E-02 | 0     | 3,64E-04 | 1,80E-04 |
| 7     | rs11824327 | LRP4      | 11  | C  | T  | 3,52E+00    | 3,75E+00   | 6,05E-02 | 0     | 4,35E-04 | 1,78E-04 |
| 7     | rs12277006 | LRP4      | 11  | A  | G  | 3,47E+00    | 3,74E+00   | 7,21E-02 | 0     | 5,25E-04 | 1,87E-04 |
| 7     | rs60940896 | CR612190  | 11  | C  | T  | 3,56E+00    | 3,75E+00   | 6,05E-02 | 0     | 3,69E-04 | 1,77E-04 |
| 7     | rs61898463 | CR612190  | 11  | G  | A  | 3,50E+00    | 3,75E+00   | 7,21E-02 | 0     | 4,65E-04 | 1,78E-04 |
| 7     | rs6485700  | LRP4      | 11  | G  | A  | 3,47E+00    | 3,74E+00   | 7,21E-02 | 0     | 5,11E-04 | 1,81E-04 |
| 7     | rs7938960  | CR612190  | 11  | C  | T  | 3,49E+00    | 3,76E+00   | 7,21E-02 | 0     | 4,78E-04 | 1,69E-04 |
| 7     | rs11039012 | CR612190  | 11  | A  | C  | 3,51E+00    | 3,74E+00   | 7,21E-02 | 0     | 4,48E-04 | 1,82E-04 |
| 7     | rs56331152 | CR612190  | 11  | T  | C  | 3,54E+00    | 3,75E+00   | 6,05E-02 | 0     | 3,99E-04 | 1,78E-04 |
| 7     | rs16938534 | LRP4/LRP4 | 11  | C  | T  | 3,51E+00    | 3,75E+00   | 7,21E-02 | 0     | 4,48E-04 | 1,77E-04 |

| Locus | SNP         | Gene      | Chr | A1 | A2 | z-score SCZ | z-score RT | conjFDR  | prune | p SCZ    | p RT     |
|-------|-------------|-----------|-----|----|----|-------------|------------|----------|-------|----------|----------|
| 7     | rs12273360  | CR612190  | 11  | C  | T  | 3,51E+00    | 3,71E+00   | 7,21E-02 | 0     | 4,48E-04 | 2,10E-04 |
| 7     | rs7112060   | LRP4/LRP4 | 11  | T  | C  | 3,51E+00    | 3,75E+00   | 7,21E-02 | 0     | 4,55E-04 | 1,79E-04 |
| 7     | rs7115038   | LRP4      | 11  | C  | G  | NaN         | NaN        | 6,05E-02 | 0     | 4,38E-04 | 1,97E-04 |
| 7     | rs11039015  | LRP4      | 11  | C  | T  | 3,52E+00    | 3,72E+00   | 6,05E-02 | 0     | 4,38E-04 | 1,97E-04 |
| 7     | rs7945548   | LRP4      | 11  | G  | A  | 3,53E+00    | 3,73E+00   | 6,05E-02 | 0     | 4,20E-04 | 1,93E-04 |
| 7     | rs11825434  | LRP4      | 11  | C  | T  | 3,53E+00    | 3,76E+00   | 6,05E-02 | 0     | 4,10E-04 | 1,68E-04 |
| 7     | rs61898529  | LRP4      | 11  | A  | G  | 3,62E+00    | 3,78E+00   | 5,07E-02 | 0     | 2,95E-04 | 1,54E-04 |
| 7     | rs7105172   | LRP4      | 11  | C  | T  | 3,59E+00    | 3,73E+00   | 5,07E-02 | 0     | 3,35E-04 | 1,94E-04 |
| 7     | rs12281784  | LRP4      | 11  | T  | C  | 3,67E+00    | 3,78E+00   | 4,23E-02 | 0     | 2,45E-04 | 1,54E-04 |
| 7     | rs11819969  | LRP4      | 11  | C  | A  | 3,67E+00    | 3,78E+00   | 4,23E-02 | 0     | 2,46E-04 | 1,55E-04 |
| 7     | rs12294921  | LRP4      | 11  | A  | G  | 3,63E+00    | 3,79E+00   | 5,07E-02 | 0     | 2,88E-04 | 1,50E-04 |
| 7     | rs7112518   | LRP4      | 11  | A  | C  | 3,68E+00    | 3,82E+00   | 4,23E-02 | 0     | 2,35E-04 | 1,36E-04 |
| 7     | rs57368576  | LRP4      | 11  | G  | C  | NaN         | NaN        | 5,07E-02 | 0     | 2,89E-04 | 1,31E-04 |
| 7     | rs61898531  | LRP4      | 11  | T  | C  | 3,40E+00    | 3,84E+00   | 8,57E-02 | 0     | 6,73E-04 | 1,23E-04 |
| 7     | rs61382645  | LRP4      | 11  | T  | C  | 3,61E+00    | 3,80E+00   | 5,07E-02 | 0     | 3,10E-04 | 1,47E-04 |
| 7     | rs6485706   | LRP4      | 11  | T  | C  | 3,68E+00    | 3,81E+00   | 4,23E-02 | 0     | 2,29E-04 | 1,41E-04 |
| 7     | rs7128102   | LRP4      | 11  | A  | G  | 3,67E+00    | 3,76E+00   | 4,23E-02 | 0     | 2,45E-04 | 1,68E-04 |
| 7     | rs7102325   | LRP4      | 11  | A  | G  | 3,70E+00    | 3,75E+00   | 3,52E-02 | 0     | 2,14E-04 | 1,75E-04 |
| 7     | rs7120113   | LRP4      | 11  | T  | C  | 3,67E+00    | 3,76E+00   | 4,23E-02 | 0     | 2,39E-04 | 1,67E-04 |
| 7     | rs9667108   | LRP4      | 11  | C  | G  | NaN         | NaN        | 4,23E-02 | 0     | 2,39E-04 | 1,73E-04 |
| 7     | rs61899283  | C11ORF49  | 11  | G  | A  | 3,41E+00    | 3,72E+00   | 8,57E-02 | 0     | 6,57E-04 | 2,02E-04 |
| 7     | rs7107703   | C11ORF49  | 11  | A  | G  | 3,43E+00    | 3,71E+00   | 8,57E-02 | 0     | 6,05E-04 | 2,09E-04 |
| 7     | rs61899292  | C11ORF49  | 11  | A  | G  | 3,40E+00    | 3,70E+00   | 8,57E-02 | 0     | 6,72E-04 | 2,16E-04 |
| 7     | rs61896127  | C11ORF49  | 11  | T  | C  | 3,41E+00    | 3,77E+00   | 8,57E-02 | 0     | 6,60E-04 | 1,66E-04 |
| 7     | rs118012321 | C11ORF49  | 11  | C  | T  | 3,44E+00    | 3,76E+00   | 8,57E-02 | 0     | 5,86E-04 | 1,71E-04 |
| 7     | rs1352307   | C11ORF49  | 11  | G  | A  | 3,48E+00    | 3,76E+00   | 7,21E-02 | 0     | 4,99E-04 | 1,67E-04 |
| 7     | rs61897848  | ARFGAP2   | 11  | T  | C  | 3,59E+00    | 3,72E+00   | 5,07E-02 | 0     | 3,36E-04 | 1,99E-04 |
| 8     | rs10773011  | SBNO1     | 12  | A  | G  | 4,16E+00    | 3,40E+00   | 8,01E-02 | 1     | 3,23E-05 | 6,66E-04 |
| 8     | rs10773012  | SBNO1     | 12  | A  | C  | 3,82E+00    | 3,41E+00   | 8,01E-02 | 0     | 1,34E-04 | 6,58E-04 |
| 9     | rs12879159  | AKAP6     | 14  | A  | G  | 3,52E+00    | 3,39E+00   | 8,01E-02 | 1     | 4,27E-04 | 6,92E-04 |
| 9     | rs12885124  | AKAP6     | 14  | G  | T  | 3,51E+00    | 3,38E+00   | 9,33E-02 | 0     | 4,44E-04 | 7,20E-04 |
| 9     | rs11623122  | AKAP6     | 14  | A  | G  | 3,49E+00    | 3,35E+00   | 9,33E-02 | 0     | 4,79E-04 | 8,11E-04 |

| Locus | SNP        | Gene     | Chr | A1 | A2 | z-score SCZ | z-score RT | conjFDR  | prune | p SCZ    | p RT     |
|-------|------------|----------|-----|----|----|-------------|------------|----------|-------|----------|----------|
| 9     | rs11156769 | AKAP6    | 14  | G  | A  | 3,49E+00    | 3,33E+00   | 9,33E-02 | 0     | 4,86E-04 | 8,56E-04 |
| 9     | rs12433255 | AKAP6    | 14  | A  | G  | 3,43E+00    | 3,33E+00   | 9,33E-02 | 0     | 6,06E-04 | 8,64E-04 |
| 9     | rs12894779 | AKAP6    | 14  | A  | G  | 3,54E+00    | 3,34E+00   | 9,33E-02 | 0     | 3,97E-04 | 8,49E-04 |
| 10    | rs1559677  | SEMA6D   | 15  | G  | A  | 3,64E+00    | 3,54E+00   | 5,80E-02 | 0     | 2,69E-04 | 3,96E-04 |
| 10    | rs1559678  | SEMA6D   | 15  | C  | T  | 3,61E+00    | 3,49E+00   | 6,84E-02 | 0     | 3,03E-04 | 4,76E-04 |
| 10    | rs1353580  | SEMA6D   | 15  | A  | T  | NaN         | NaN        | 6,84E-02 | 0     | 2,97E-04 | 4,66E-04 |
| 10    | rs1948572  | SEMA6D   | 15  | T  | C  | 3,58E+00    | 3,47E+00   | 6,84E-02 | 0     | 3,41E-04 | 5,20E-04 |
| 10    | rs6493279  | SEMA6D   | 15  | C  | T  | 3,65E+00    | 3,47E+00   | 6,84E-02 | 0     | 2,67E-04 | 5,25E-04 |
| 10    | rs6493280  | SEMA6D   | 15  | C  | T  | 3,60E+00    | 3,49E+00   | 6,84E-02 | 0     | 3,13E-04 | 4,77E-04 |
| 10    | rs1991206  | SEMA6D   | 15  | C  | T  | 3,61E+00    | 3,52E+00   | 5,80E-02 | 0     | 3,10E-04 | 4,39E-04 |
| 10    | rs1991207  | SEMA6D   | 15  | A  | T  | NaN         | NaN        | 5,80E-02 | 0     | 3,16E-04 | 4,33E-04 |
| 10    | rs1991208  | SEMA6D   | 15  | G  | T  | 3,60E+00    | 3,51E+00   | 5,80E-02 | 0     | 3,16E-04 | 4,43E-04 |
| 10    | rs1390869  | SEMA6D   | 15  | C  | T  | 3,56E+00    | 3,49E+00   | 6,84E-02 | 0     | 3,67E-04 | 4,90E-04 |
| 10    | rs1496897  | SEMA6D   | 15  | C  | T  | 3,60E+00    | 3,59E+00   | 5,07E-02 | 1     | 3,22E-04 | 3,35E-04 |
| 10    | rs13313462 | SEMA6D   | 15  | G  | A  | 3,58E+00    | 3,54E+00   | 5,80E-02 | 0     | 3,43E-04 | 4,04E-04 |
| 10    | rs12593841 | SEMA6D   | 15  | A  | G  | 3,57E+00    | 3,53E+00   | 5,80E-02 | 0     | 3,55E-04 | 4,17E-04 |
| 10    | rs11857221 | SEMA6D   | 15  | A  | C  | 3,59E+00    | 3,52E+00   | 5,80E-02 | 0     | 3,26E-04 | 4,33E-04 |
| 10    | rs7175662  | SEMA6D   | 15  | G  | A  | 3,57E+00    | 3,54E+00   | 6,05E-02 | 0     | 3,55E-04 | 4,04E-04 |
| 10    | rs7169840  | SEMA6D   | 15  | A  | C  | 3,45E+00    | 3,56E+00   | 7,21E-02 | 0     | 5,59E-04 | 3,76E-04 |
| 10    | rs28597109 | SEMA6D   | 15  | C  | A  | 3,57E+00    | 3,52E+00   | 6,05E-02 | 0     | 3,58E-04 | 4,36E-04 |
| 10    | rs2173093  | SEMA6D   | 15  | A  | G  | 3,58E+00    | 3,53E+00   | 5,80E-02 | 0     | 3,40E-04 | 4,23E-04 |
| 10    | rs11070586 | SEMA6D   | 15  | T  | A  | NaN         | NaN        | 6,05E-02 | 0     | 3,63E-04 | 4,26E-04 |
| 11    | rs216452   | DQ584120 | 17  | T  | C  | 3,66E+00    | 3,65E+00   | 4,23E-02 | 1     | 2,50E-04 | 2,59E-04 |
| 12    | rs17527878 | AK127787 | 18  | T  | C  | 4,85E+00    | 3,42E+00   | 8,01E-02 | 1     | 1,21E-06 | 6,23E-04 |
| 12    | rs12458596 | AK127787 | 18  | G  | A  | 4,89E+00    | 3,44E+00   | 8,01E-02 | 0     | 1,03E-06 | 5,74E-04 |
| 12    | rs57820851 | AK127787 | 18  | T  | G  | 4,65E+00    | 3,41E+00   | 8,01E-02 | 0     | 3,30E-06 | 6,59E-04 |
| 13    | rs6095357  | ARFGEF2  | 20  | A  | C  | -3,85E+00   | -3,33E+00  | 9,33E-02 | 0     | 1,18E-04 | 8,60E-04 |
| 13    | rs1997851  | ARFGEF2  | 20  | T  | G  | -3,63E+00   | -3,35E+00  | 9,33E-02 | 0     | 2,87E-04 | 8,14E-04 |
| 13    | rs6012555  | ARFGEF2  | 20  | A  | C  | -3,62E+00   | -3,32E+00  | 9,33E-02 | 0     | 2,92E-04 | 8,89E-04 |
| 13    | rs6066909  | ARFGEF2  | 20  | C  | T  | -3,63E+00   | -3,34E+00  | 9,33E-02 | 0     | 2,82E-04 | 8,44E-04 |
| 13    | rs6095359  | ARFGEF2  | 20  | T  | C  | -3,62E+00   | -3,35E+00  | 9,33E-02 | 0     | 3,00E-04 | 8,19E-04 |
| 13    | rs6019516  | ARFGEF2  | 20  | C  | T  | -3,61E+00   | -3,35E+00  | 9,33E-02 | 0     | 3,04E-04 | 8,13E-04 |

| <b>Locus</b> | <b>SNP</b> | <b>Gene</b> | <b>Chr</b> | <b>A1</b> | <b>A2</b> | <b>z-score SCZ</b> | <b>z-score RT</b> | <b>conjFDR</b> | <b>prune</b> | <b>p SCZ</b> | <b>p RT</b> |
|--------------|------------|-------------|------------|-----------|-----------|--------------------|-------------------|----------------|--------------|--------------|-------------|
| 13           | rs6019519  | ARFGEF2     | 20         | T         | C         | -3,67E+00          | -3,41E+00         | 8,01E-02       | 1            | 2,47E-04     | 6,46E-04    |
| 13           | rs4810894  | ARFGEF2     | 20         | A         | G         | -3,60E+00          | -3,38E+00         | 9,33E-02       | 0            | 3,20E-04     | 7,22E-04    |
| 13           | rs1467417  | ARFGEF2     | 20         | T         | C         | -3,60E+00          | -3,37E+00         | 9,33E-02       | 0            | 3,23E-04     | 7,52E-04    |
| 13           | rs4810896  | ARFGEF2     | 20         | A         | C         | -3,62E+00          | -3,38E+00         | 9,33E-02       | 0            | 3,00E-04     | 7,19E-04    |

**eTable 4.** Significant eQTL Functionality of SNPs With Conjunction FDR<.05 Identified Using GTEx (www.gtexportal.org). The effect size is computed as the effect of the alternative allele relative to the reference allele.

| <b>Gencode Id</b>  | <b>Gene Symbol</b> | <b>SNP Id</b> | <b>A1/A2</b> | <b>P-value</b> | <b>Effect Size</b> | <b>Tissue</b>                       |
|--------------------|--------------------|---------------|--------------|----------------|--------------------|-------------------------------------|
| ENSG00000162989.3  | KCNJ3              | rs67338739    | C/T          | 0.000026       | 0.32               | <b>Brain - Cerebellum</b>           |
| ENSG00000196141.8  | SPATS2L            | rs6435048     | C/T          | 0.0000020      | 0.29               | Skin - Sun Exposed (Lower leg)      |
| ENSG00000201499.1  | RNU6-312P          | rs6435048     | C/T          | 0.0000026      | 0.52               | Heart - Atrial Appendage            |
| ENSG00000226124.2  | FTCDNL1            | rs6435048     | C/T          | 0.000024       | -0.29              | Thyroid                             |
| ENSG00000226124.2  | FTCDNL1            | rs6435048     | C/T          | 0.000027       | -0.23              | Muscle - Skeletal                   |
| ENSG00000232732.5  | AC073043.1         | rs6435048     | C/T          | 0.00013        | 0.41               | Testis                              |
| ENSG00000163939.14 | PBRM1              | rs4282054     | C/T          | 1.4e-14        | 0.37               | Thyroid                             |
| ENSG00000168268.6  | NT5DC2             | rs4282054     | C/T          | 4.5e-14        | -0.19              | Cells - Transformed fibroblasts     |
| ENSG00000168268.6  | NT5DC2             | rs4282054     | C/T          | 1.1e-13        | -0.31              | Skin - Sun Exposed (Lower leg)      |
| ENSG00000168237.13 | GLYCTK             | rs4282054     | C/T          | 3.6e-12        | -0.31              | Thyroid                             |
| ENSG00000114904.8  | NEK4               | rs4282054     | C/T          | 2.3e-11        | -0.32              | Cells - Transformed fibroblasts     |
| ENSG00000168268.6  | NT5DC2             | rs4282054     | C/T          | 3.1e-10        | -0.51              | Cells - EBV-transformed lymphocytes |
| ENSG00000168268.6  | NT5DC2             | rs4282054     | C/T          | 8.8e-10        | -0.28              | Thyroid                             |
| ENSG00000163939.14 | PBRM1              | rs4282054     | C/T          | 1.3e-9         | 0.17               | Artery - Tibial                     |
| ENSG00000163938.12 | GNL3               | rs4282054     | C/T          | 1.7e-9         | -0.18              | Cells - Transformed fibroblasts     |
| ENSG00000055955.11 | ITIH4              | rs4282054     | C/T          | 1.7e-9         | 0.47               | Artery - Aorta                      |
| ENSG00000055955.11 | ITIH4              | rs4282054     | C/T          | 1.1e-8         | 0.42               | Artery - Tibial                     |
| ENSG00000163938.12 | GNL3               | rs4282054     | C/T          | 1.5e-8         | -0.22              | Artery - Aorta                      |
| ENSG00000055955.11 | ITIH4              | rs4282054     | C/T          | 1.7e-8         | 0.19               | Muscle - Skeletal                   |
| ENSG00000168237.13 | GLYCTK             | rs4282054     | C/T          | 2.1e-8         | -0.21              | Whole Blood                         |
| ENSG00000163938.12 | GNL3               | rs4282054     | C/T          | 4.7e-8         | -0.24              | Esophagus - Muscularis              |
| ENSG00000168268.6  | NT5DC2             | rs4282054     | C/T          | 5.4e-8         | -0.47              | Colon - Sigmoid                     |
| ENSG00000163938.12 | GNL3               | rs4282054     | C/T          | 1.1e-7         | -0.22              | Artery - Tibial                     |
| ENSG00000213533.7  | TMEM110            | rs4282054     | C/T          | 3.0e-7         | 0.30               | Artery - Aorta                      |

| Gencode Id         | Gene Symbol | SNP Id    | A1/A2 | P-value   | Effect Size | Tissue                               |
|--------------------|-------------|-----------|-------|-----------|-------------|--------------------------------------|
| ENSG00000168268.6  | NT5DC2      | rs4282054 | C/T   | 3.6e-7    | -0.26       | Testis                               |
| ENSG00000114904.8  | NEK4        | rs4282054 | C/T   | 4.1e-7    | -0.25       | Thyroid                              |
| ENSG00000168268.6  | NT5DC2      | rs4282054 | C/T   | 4.8e-7    | -0.28       | Artery - Aorta                       |
| ENSG00000213533.7  | TMEM110     | rs4282054 | C/T   | 5.2e-7    | 0.26        | Adipose - Subcutaneous               |
| ENSG00000213533.7  | TMEM110     | rs4282054 | C/T   | 9.7e-7    | 0.21        | Muscle - Skeletal                    |
| ENSG00000163939.14 | PBRM1       | rs4282054 | C/T   | 0.0000010 | -0.14       | Cells - Transformed fibroblasts      |
| ENSG00000272573.1  | MUSTN1      | rs4282054 | C/T   | 0.0000011 | 0.38        | Artery - Aorta                       |
| ENSG00000168268.6  | NT5DC2      | rs4282054 | C/T   | 0.0000014 | -0.30       | Colon - Transverse                   |
| ENSG00000055955.11 | ITIH4       | rs4282054 | C/T   | 0.0000022 | 0.31        | Cells - Transformed fibroblasts      |
| ENSG00000168268.6  | NT5DC2      | rs4282054 | C/T   | 0.0000028 | 0.38        | Heart - Atrial Appendage             |
| ENSG00000163938.12 | GNL3        | rs4282054 | C/T   | 0.0000036 | -0.24       | Heart - Left Ventricle               |
| ENSG00000168237.13 | GLYCTK      | rs4282054 | C/T   | 0.0000043 | -0.21       | Lung                                 |
| ENSG00000114904.8  | NEK4        | rs4282054 | C/T   | 0.0000043 | -0.21       | Artery - Tibial                      |
| ENSG00000168237.13 | GLYCTK      | rs4282054 | C/T   | 0.0000044 | -0.24       | Esophagus - Mucosa                   |
| ENSG00000163938.12 | GNL3        | rs4282054 | C/T   | 0.0000047 | -0.17       | Colon - Transverse                   |
| ENSG00000163938.12 | GNL3        | rs4282054 | C/T   | 0.0000062 | -0.53       | <b>Brain - Cerebellum</b>            |
| ENSG00000163938.12 | GNL3        | rs4282054 | C/T   | 0.0000067 | -0.29       | Testis                               |
| ENSG00000163938.12 | GNL3        | rs4282054 | C/T   | 0.0000079 | -0.48       | <b>Brain - Cerebellar Hemisphere</b> |
| ENSG00000055955.11 | ITIH4       | rs4282054 | C/T   | 0.0000085 | 0.24        | Whole Blood                          |
| ENSG00000114904.8  | NEK4        | rs4282054 | C/T   | 0.0000090 | -0.26       | Breast - Mammary Tissue              |
| ENSG00000163938.12 | GNL3        | rs4282054 | C/T   | 0.000014  | -0.33       | <b>Brain - Frontal Cortex (BA9)</b>  |
| ENSG00000055955.11 | ITIH4       | rs4282054 | C/T   | 0.000016  | 0.18        | Adipose - Subcutaneous               |
| ENSG00000114904.8  | NEK4        | rs4282054 | C/T   | 0.000017  | -0.25       | Nerve - Tibial                       |
| ENSG00000114904.8  | NEK4        | rs4282054 | C/T   | 0.000021  | -0.28       | Esophagus - Mucosa                   |
| ENSG00000114904.8  | NEK4        | rs4282054 | C/T   | 0.000021  | -0.25       | Adipose - Visceral (Omentum)         |
| ENSG00000168268.6  | NT5DC2      | rs4282054 | C/T   | 0.000022  | -0.22       | Skin - Not Sun Exposed (Suprapubic)  |



| Gencode Id         | Gene Symbol   | SNP Id     | A1/A2 | P-value   | Effect Size | Tissue                               |
|--------------------|---------------|------------|-------|-----------|-------------|--------------------------------------|
| ENSG00000168237.13 | GLYCTK        | rs4282054  | C/T   | 0.000026  | -0.36       | Spleen                               |
| ENSG00000114904.8  | NEK4          | rs4282054  | C/T   | 0.000029  | -0.19       | Skin - Sun Exposed (Lower leg)       |
| ENSG00000213533.7  | TMEM110       | rs4282054  | C/T   | 0.000033  | 0.16        | Whole Blood                          |
| ENSG00000114904.8  | NEK4          | rs4282054  | C/T   | 0.000042  | -0.19       | Esophagus - Muscularis               |
| ENSG00000168237.13 | GLYCTK        | rs4282054  | C/T   | 0.000043  | -0.16       | Colon - Transverse                   |
| ENSG00000168268.6  | NT5DC2        | rs4282054  | C/T   | 0.000043  | -0.33       | Spleen                               |
| ENSG00000163938.12 | GNL3          | rs4282054  | C/T   | 0.000051  | -0.15       | Nerve - Tibial                       |
| ENSG00000168237.13 | GLYCTK        | rs4282054  | C/T   | 0.000060  | -0.20       | Esophagus - Muscularis               |
| ENSG00000168268.6  | NT5DC2        | rs4282054  | C/T   | 0.000062  | -0.22       | Breast - Mammary Tissue              |
| ENSG00000055955.11 | ITIH4         | rs4282054  | C/T   | 0.000064  | 0.19        | Skin - Sun Exposed (Lower leg)       |
| ENSG00000114904.8  | NEK4          | rs4282054  | C/T   | 0.000081  | -0.17       | Lung                                 |
| ENSG00000272573.1  | MUSTN1        | rs4282054  | C/T   | 0.000086  | 0.19        | Whole Blood                          |
| ENSG00000168268.6  | NT5DC2        | rs4282054  | C/T   | 0.00010   | -0.22       | Nerve - Tibial                       |
| ENSG00000168237.13 | GLYCTK        | rs4282054  | C/T   | 0.00011   | -0.33       | <b>Brain - Cerebellum</b>            |
| ENSG00000242094.1  | FOXP1-IT1     | rs9837383  | T/C   | 0.000023  | -0.29       | Testis                               |
| ENSG00000049167.9  | ERCC8         | rs4391122  | A/G   | 0.00014   | 0.18        | Cells - Transformed fibroblasts      |
| ENSG00000205464.7  | ATP6AP1L      | rs12521503 | C/T   | 0.000037  | -0.28       | Skin - Sun Exposed (Lower leg)       |
| ENSG00000237513.1  | RP11-325F22.2 | rs4266584  | A/C   | 0.0000043 | -0.16       | Whole Blood                          |
| ENSG00000227603.1  | RP11-165J3.6  | rs7857165  | T/A   | 0.000015  | 1.2         | <b>Brain - Cerebellar Hemisphere</b> |
| ENSG00000227603.1  | RP11-165J3.6  | rs7857165  | T/A   | 0.000029  | 0.72        | Thyroid                              |
| ENSG00000107954.6  | NEURL         | rs12253987 | T/A   | 0.0000064 | -0.35       | Cells - Transformed fibroblasts      |
| ENSG00000175224.12 | ATG13         | rs2046768  | T/C   | 1.5e-9    | -0.32       | Esophagus - Muscularis               |
| ENSG00000175224.12 | ATG13         | rs2046768  | T/C   | 2.1e-8    | -0.24       | Skin - Sun Exposed (Lower leg)       |
| ENSG00000175224.12 | ATG13         | rs2046768  | T/C   | 0.0000014 | -0.21       | Skin - Not Sun Exposed (Suprapubic)  |
| ENSG00000165905.12 | GYLTL1B       | rs2046768  | T/C   | 0.0000054 | 0.46        | Muscle - Skeletal                    |
| ENSG00000180720.6  | CHRM4         | rs2046768  | T/C   | 0.0000059 | -0.42       | Nerve - Tibial                       |

| Gencode Id         | Gene Symbol | SNP Id    | A1/A2 | P-value  | Effect Size | Tissue                                           |
|--------------------|-------------|-----------|-------|----------|-------------|--------------------------------------------------|
| ENSG00000110492.11 | MDK         | rs2046768 | T/C   | 0.000011 | -0.24       | Artery - Tibial                                  |
| ENSG00000175224.12 | ATG13       | rs2046768 | T/C   | 0.000015 | -0.15       | Cells - Transformed fibroblasts                  |
| ENSG00000175224.12 | ATG13       | rs2046768 | T/C   | 0.000037 | -0.33       | Adipose - Visceral (Omentum)                     |
| ENSG00000165912.11 | PACSIN3     | rs2046768 | T/C   | 0.000048 | 0.31        | Esophagus - Mucosa                               |
| ENSG00000110492.11 | MDK         | rs2046768 | T/C   | 0.000088 | -0.27       | Heart - Left Ventricle                           |
| ENSG00000175224.12 | ATG13       | rs2046768 | T/C   | 0.00010  | -0.18       | Nerve - Tibial                                   |
| ENSG00000175224.12 | ATG13       | rs2046768 | T/C   | 0.00011  | -0.30       | Thyroid                                          |
| ENSG00000249839.1  | AC011330.5  | rs524908  | A/C   | 2.9e-16  | 0.66        | Thyroid                                          |
| ENSG00000166763.7  | STRCP1      | rs524908  | A/C   | 2.7e-14  | -0.51       | Thyroid                                          |
| ENSG00000249839.1  | AC011330.5  | rs524908  | A/C   | 5.1e-13  | 0.75        | Testis                                           |
| ENSG00000249839.1  | AC011330.5  | rs524908  | A/C   | 7.3e-13  | 0.62        | Lung                                             |
| ENSG00000166763.7  | STRCP1      | rs524908  | A/C   | 1.3e-12  | -0.52       | Nerve - Tibial                                   |
| ENSG00000242866.5  | STRC        | rs524908  | A/C   | 2.9e-11  | -0.64       | <b>Brain - Caudate (basal ganglia)</b>           |
| ENSG00000166763.7  | STRCP1      | rs524908  | A/C   | 6.0e-11  | -0.55       | Skin - Not Sun Exposed (Suprapubic)              |
| ENSG00000249839.1  | AC011330.5  | rs524908  | A/C   | 7.0e-11  | 0.90        | <b>Brain - Cerebellar Hemisphere</b>             |
| ENSG00000166763.7  | STRCP1      | rs524908  | A/C   | 7.2e-11  | -0.36       | Skin - Sun Exposed (Lower leg)                   |
| ENSG00000205771.2  | CATSPER2P1  | rs524908  | A/C   | 2.5e-10  | -0.41       | Cells - Transformed fibroblasts                  |
| ENSG00000166763.7  | STRCP1      | rs524908  | A/C   | 2.7e-10  | -0.63       | Cells - EBV-transformed lymphocytes              |
| ENSG00000242866.5  | STRC        | rs524908  | A/C   | 5.0e-10  | -0.39       | Muscle - Skeletal                                |
| ENSG00000140265.8  | ZSCAN29     | rs524908  | A/C   | 5.8e-10  | 0.31        | Thyroid                                          |
| ENSG00000166763.7  | STRCP1      | rs524908  | A/C   | 9.3e-10  | -0.41       | Whole Blood                                      |
| ENSG00000249839.1  | AC011330.5  | rs524908  | A/C   | 1.1e-9   | 0.49        | Artery - Tibial                                  |
| ENSG00000249839.1  | AC011330.5  | rs524908  | A/C   | 2.0e-9   | 0.57        | Nerve - Tibial                                   |
| ENSG00000168803.10 | ADAL        | rs524908  | A/C   | 3.8e-9   | 0.93        | <b>Brain - Anterior cingulate cortex (BA24)</b>  |
| ENSG00000166763.7  | STRCP1      | rs524908  | A/C   | 1.2e-8   | -0.43       | Esophagus - Muscularis                           |
| ENSG00000242866.5  | STRC        | rs524908  | A/C   | 1.4e-8   | -0.64       | <b>Brain - Nucleus accumbens (basal ganglia)</b> |

| Gencode Id         | Gene Symbol | SNP Id   | A1/A2 | P-value   | Effect Size | Tissue                                |
|--------------------|-------------|----------|-------|-----------|-------------|---------------------------------------|
| ENSG00000140265.8  | ZSCAN29     | rs524908 | A/C   | 1.5e-8    | 0.31        | Skin - Sun Exposed (Lower leg)        |
| ENSG00000242866.5  | STRC        | rs524908 | A/C   | 2.3e-8    | -0.40       | Thyroid                               |
| ENSG00000168803.10 | ADAL        | rs524908 | A/C   | 3.6e-8    | 0.37        | Nerve - Tibial                        |
| ENSG00000104055.10 | TGM5        | rs524908 | A/C   | 7.5e-8    | -0.61       | Cells - EBV-transformed lymphocytes   |
| ENSG00000140265.8  | ZSCAN29     | rs524908 | A/C   | 8.5e-8    | 0.30        | Breast - Mammary Tissue               |
| ENSG00000249839.1  | AC011330.5  | rs524908 | A/C   | 9.1e-8    | 0.50        | Esophagus - Muscularis                |
| ENSG00000166763.7  | STRCP1      | rs524908 | A/C   | 1.1e-7    | -0.30       | Adipose - Subcutaneous                |
| ENSG00000166763.7  | STRCP1      | rs524908 | A/C   | 2.1e-7    | -0.59       | Liver                                 |
| ENSG00000166763.7  | STRCP1      | rs524908 | A/C   | 2.7e-7    | -0.67       | Ovary                                 |
| ENSG00000223572.5  | CKMT1A      | rs524908 | A/C   | 2.9e-7    | 0.33        | Esophagus - Mucosa                    |
| ENSG00000159495.7  | TGM7        | rs524908 | A/C   | 3.0e-7    | -0.42       | Esophagus - Mucosa                    |
| ENSG00000166763.7  | STRCP1      | rs524908 | A/C   | 3.9e-7    | -0.39       | Artery - Tibial                       |
| ENSG00000242866.5  | STRC        | rs524908 | A/C   | 4.0e-7    | -0.44       | Skin - Not Sun Exposed (Suprapubic)   |
| ENSG00000249839.1  | AC011330.5  | rs524908 | A/C   | 4.7e-7    | 0.76        | <b>Brain - Cerebellum</b>             |
| ENSG00000249839.1  | AC011330.5  | rs524908 | A/C   | 4.8e-7    | 0.62        | Heart - Atrial Appendage              |
| ENSG00000242866.5  | STRC        | rs524908 | A/C   | 5.5e-7    | -0.34       | Adipose - Subcutaneous                |
| ENSG00000242866.5  | STRC        | rs524908 | A/C   | 6.3e-7    | -0.30       | Skin - Sun Exposed (Lower leg)        |
| ENSG00000242866.5  | STRC        | rs524908 | A/C   | 6.4e-7    | -0.61       | <b>Brain - Cortex</b>                 |
| ENSG00000242866.5  | STRC        | rs524908 | A/C   | 7.0e-7    | -0.39       | Testis                                |
| ENSG00000168803.10 | ADAL        | rs524908 | A/C   | 0.0000011 | 0.23        | Cells - Transformed fibroblasts       |
| ENSG00000166763.7  | STRCP1      | rs524908 | A/C   | 0.0000013 | -0.56       | Esophagus - Gastroesophageal Junction |
| ENSG00000249839.1  | AC011330.5  | rs524908 | A/C   | 0.0000013 | 0.67        | Artery - Coronary                     |
| ENSG00000249839.1  | AC011330.5  | rs524908 | A/C   | 0.0000013 | 0.77        | Uterus                                |
| ENSG00000166763.7  | STRCP1      | rs524908 | A/C   | 0.0000016 | -0.44       | Testis                                |
| ENSG00000249839.1  | AC011330.5  | rs524908 | A/C   | 0.0000017 | 0.51        | Breast - Mammary Tissue               |
| ENSG00000166763.7  | STRCP1      | rs524908 | A/C   | 0.0000018 | -0.79       | Uterus                                |

| Gencode Id         | Gene Symbol | SNP Id   | A1/A2 | P-value   | Effect Size | Tissue                                 |
|--------------------|-------------|----------|-------|-----------|-------------|----------------------------------------|
| ENSG00000166763.7  | STRCP1      | rs524908 | A/C   | 0.0000019 | -0.32       | Lung                                   |
| ENSG00000166763.7  | STRCP1      | rs524908 | A/C   | 0.0000023 | -0.70       | Small Intestine - Terminal Ileum       |
| ENSG00000249839.1  | AC011330.5  | rs524908 | A/C   | 0.0000024 | 0.39        | Adipose - Subcutaneous                 |
| ENSG00000242866.5  | STRC        | rs524908 | A/C   | 0.0000026 | -0.36       | Nerve - Tibial                         |
| ENSG00000168803.10 | ADAL        | rs524908 | A/C   | 0.0000033 | 0.16        | Muscle - Skeletal                      |
| ENSG00000140264.15 | SERF2       | rs524908 | A/C   | 0.0000034 | 0.17        | Whole Blood                            |
| ENSG00000249839.1  | AC011330.5  | rs524908 | A/C   | 0.0000035 | 0.38        | Esophagus - Mucosa                     |
| ENSG00000249839.1  | AC011330.5  | rs524908 | A/C   | 0.0000038 | 0.63        | Cells - EBV-transformed lymphocytes    |
| ENSG00000249839.1  | AC011330.5  | rs524908 | A/C   | 0.0000041 | 0.50        | Skin - Not Sun Exposed (Suprapubic)    |
| ENSG00000242866.5  | STRC        | rs524908 | A/C   | 0.0000045 | -0.45       | Colon - Transverse                     |
| ENSG00000166763.7  | STRCP1      | rs524908 | A/C   | 0.0000046 | -0.40       | Artery - Aorta                         |
| ENSG00000249839.1  | AC011330.5  | rs524908 | A/C   | 0.0000050 | 0.38        | Skin - Sun Exposed (Lower leg)         |
| ENSG00000168803.10 | ADAL        | rs524908 | A/C   | 0.0000051 | 0.29        | Thyroid                                |
| ENSG00000242866.5  | STRC        | rs524908 | A/C   | 0.0000056 | -0.29       | Breast - Mammary Tissue                |
| ENSG00000168803.10 | ADAL        | rs524908 | A/C   | 0.0000057 | 0.28        | Lung                                   |
| ENSG00000249839.1  | AC011330.5  | rs524908 | A/C   | 0.0000058 | 0.67        | Prostate                               |
| ENSG00000242866.5  | STRC        | rs524908 | A/C   | 0.0000062 | -0.49       | <b>Brain - Frontal Cortex (BA9)</b>    |
| ENSG00000167004.8  | PDIA3       | rs524908 | A/C   | 0.0000062 | 0.12        | Whole Blood                            |
| ENSG00000166763.7  | STRCP1      | rs524908 | A/C   | 0.0000065 | -0.54       | Prostate                               |
| ENSG00000140265.8  | ZSCAN29     | rs524908 | A/C   | 0.0000066 | 0.27        | Esophagus - Muscularis                 |
| ENSG00000242866.5  | STRC        | rs524908 | A/C   | 0.0000072 | -0.37       | Esophagus - Muscularis                 |
| ENSG00000140265.8  | ZSCAN29     | rs524908 | A/C   | 0.0000077 | 0.29        | Adipose - Visceral (Omentum)           |
| ENSG00000140265.8  | ZSCAN29     | rs524908 | A/C   | 0.0000086 | 0.14        | Cells - Transformed fibroblasts        |
| ENSG00000242866.5  | STRC        | rs524908 | A/C   | 0.000010  | -0.49       | <b>Brain - Putamen (basal ganglia)</b> |
| ENSG00000168803.10 | ADAL        | rs524908 | A/C   | 0.000010  | 0.24        | Breast - Mammary Tissue                |
| ENSG00000168803.10 | ADAL        | rs524908 | A/C   | 0.000013  | 0.28        | Skin - Sun Exposed (Lower leg)         |

| <b>Gencode Id</b>  | <b>Gene Symbol</b> | <b>SNP Id</b> | <b>A1/A2</b> | <b>P-value</b> | <b>Effect Size</b> | <b>Tissue</b>                       |
|--------------------|--------------------|---------------|--------------|----------------|--------------------|-------------------------------------|
| ENSG00000166763.7  | STRCP1             | rs524908      | A/C          | 0.000016       | -0.26              | Breast - Mammary Tissue             |
| ENSG00000140265.8  | ZSCAN29            | rs524908      | A/C          | 0.000018       | 0.15               | Muscle - Skeletal                   |
| ENSG00000249839.1  | AC011330.5         | rs524908      | A/C          | 0.000021       | 0.44               | Artery - Aorta                      |
| ENSG00000205771.2  | CATSPER2P1         | rs524908      | A/C          | 0.000028       | -0.26              | Muscle - Skeletal                   |
| ENSG00000168806.6  | LCMT2              | rs524908      | A/C          | 0.000029       | -0.22              | Esophagus - Mucosa                  |
| ENSG00000205771.2  | CATSPER2P1         | rs524908      | A/C          | 0.000029       | -0.34              | Skin - Sun Exposed (Lower leg)      |
| ENSG00000166763.7  | STRCP1             | rs524908      | A/C          | 0.000034       | -0.63              | Spleen                              |
| ENSG00000140265.8  | ZSCAN29            | rs524908      | A/C          | 0.000039       | 0.22               | Adipose - Subcutaneous              |
| ENSG00000168803.10 | ADAL               | rs524908      | A/C          | 0.000048       | 0.25               | Adipose - Subcutaneous              |
| ENSG00000249839.1  | AC011330.5         | rs524908      | A/C          | 0.000059       | 0.57               | Colon - Sigmoid                     |
| ENSG00000205771.2  | CATSPER2P1         | rs524908      | A/C          | 0.000066       | -0.39              | Skin - Not Sun Exposed (Suprapubic) |
| ENSG00000249839.1  | AC011330.5         | rs524908      | A/C          | 0.000066       | 0.58               | Pituitary                           |
| ENSG00000067369.9  | TP53BP1            | rs524908      | A/C          | 0.000072       | 0.15               | Esophagus - Muscularis              |
| ENSG00000140265.8  | ZSCAN29            | rs524908      | A/C          | 0.000079       | 0.28               | Colon - Transverse                  |
| ENSG00000168803.10 | ADAL               | rs524908      | A/C          | 0.00011        | 0.32               | Skin - Not Sun Exposed (Suprapubic) |
| ENSG00000166763.7  | STRCP1             | rs524908      | A/C          | 0.00012        | -0.49              | Adrenal Gland                       |
| ENSG00000067369.9  | TP53BP1            | rs524908      | A/C          | 0.00012        | 0.14               | Cells - Transformed fibroblasts     |
| ENSG00000205771.2  | CATSPER2P1         | rs524908      | A/C          | 0.00013        | -0.31              | Lung                                |
| ENSG00000140265.8  | ZSCAN29            | rs524908      | A/C          | 0.00015        | 0.22               | Testis                              |
| ENSG00000249839.1  | AC011330.5         | rs524908      | A/C          | 0.00015        | 0.47               | Colon - Transverse                  |
| ENSG00000259928.1  | RP11-218M11.1      | rs216452      | C/T          | 8.6e-7         | -0.23              | Testis                              |
| ENSG00000230113.1  | AC091177.1         | rs216452      | C/T          | 0.000093       | 0.31               | Artery - Aorta                      |
| ENSG00000167549.14 | CORO6              | rs216452      | C/T          | 0.00015        | 0.29               | Thyroid                             |
| ENSG00000100197.16 | CYP2D6             | rs134873      | T/G          | 4.1e-33        | -0.69              | Whole Blood                         |
| ENSG00000100197.16 | CYP2D6             | rs134873      | T/G          | 1.9e-29        | -0.76              | Skin - Sun Exposed (Lower leg)      |
| ENSG00000183066.10 | WBP2NL             | rs134873      | T/G          | 8.2e-21        | -0.48              | Testis                              |

| Gencode Id         | Gene Symbol | SNP Id   | A1/A2 | P-value | Effect Size | Tissue                                           |
|--------------------|-------------|----------|-------|---------|-------------|--------------------------------------------------|
| ENSG00000100197.16 | CYP2D6      | rs134873 | T/G   | 9.1e-21 | -0.79       | Esophagus - Mucosa                               |
| ENSG00000100197.16 | CYP2D6      | rs134873 | T/G   | 1.8e-20 | -0.66       | Thyroid                                          |
| ENSG00000100197.16 | CYP2D6      | rs134873 | T/G   | 2.0e-17 | -0.66       | Lung                                             |
| ENSG00000198951.7  | NAGA        | rs134873 | T/G   | 4.5e-17 | 0.47        | Nerve - Tibial                                   |
| ENSG00000198951.7  | NAGA        | rs134873 | T/G   | 7.1e-17 | 0.45        | Thyroid                                          |
| ENSG00000100197.16 | CYP2D6      | rs134873 | T/G   | 4.3e-16 | -0.84       | <b>Brain - Nucleus accumbens (basal ganglia)</b> |
| ENSG00000100197.16 | CYP2D6      | rs134873 | T/G   | 1.1e-15 | -0.66       | Artery - Tibial                                  |
| ENSG00000100197.16 | CYP2D6      | rs134873 | T/G   | 1.1e-14 | -0.63       | Skin - Not Sun Exposed (Suprapubic)              |
| ENSG00000100197.16 | CYP2D6      | rs134873 | T/G   | 4.3e-14 | -0.63       | Esophagus - Muscularis                           |
| ENSG00000198951.7  | NAGA        | rs134873 | T/G   | 7.6e-14 | 0.29        | Cells - Transformed fibroblasts                  |
| ENSG00000100197.16 | CYP2D6      | rs134873 | T/G   | 1.4e-13 | -0.56       | Adipose - Subcutaneous                           |
| ENSG00000100197.16 | CYP2D6      | rs134873 | T/G   | 3.6e-13 | -0.94       | <b>Brain - Cerebellar Hemisphere</b>             |
| ENSG00000198951.7  | NAGA        | rs134873 | T/G   | 5.2e-13 | 0.41        | Muscle - Skeletal                                |
| ENSG00000100197.16 | CYP2D6      | rs134873 | T/G   | 6.8e-12 | -0.95       | Spleen                                           |
| ENSG00000198951.7  | NAGA        | rs134873 | T/G   | 7.5e-12 | 0.30        | Skin - Sun Exposed (Lower leg)                   |
| ENSG00000198951.7  | NAGA        | rs134873 | T/G   | 1.2e-11 | 0.44        | Esophagus - Muscularis                           |
| ENSG00000100197.16 | CYP2D6      | rs134873 | T/G   | 3.2e-11 | -0.70       | <b>Brain - Caudate (basal ganglia)</b>           |
| ENSG00000183172.8  | SMDT1       | rs134873 | T/G   | 4.2e-11 | 0.32        | Whole Blood                                      |
| ENSG00000198951.7  | NAGA        | rs134873 | T/G   | 4.3e-11 | 0.24        | Adipose - Subcutaneous                           |
| ENSG00000100197.16 | CYP2D6      | rs134873 | T/G   | 4.4e-11 | -0.74       | <b>Brain - Putamen (basal ganglia)</b>           |
| ENSG00000100197.16 | CYP2D6      | rs134873 | T/G   | 4.5e-11 | -0.81       | <b>Brain - Cerebellum</b>                        |
| ENSG00000198951.7  | NAGA        | rs134873 | T/G   | 9.4e-11 | 0.55        | Pancreas                                         |
| ENSG00000198951.7  | NAGA        | rs134873 | T/G   | 1.0e-10 | 0.41        | Artery - Aorta                                   |
| ENSG00000100197.16 | CYP2D6      | rs134873 | T/G   | 1.3e-10 | -0.39       | Colon - Transverse                               |
| ENSG00000198951.7  | NAGA        | rs134873 | T/G   | 1.4e-10 | 0.33        | Skin - Not Sun Exposed (Suprapubic)              |
| ENSG00000100197.16 | CYP2D6      | rs134873 | T/G   | 1.6e-10 | -0.72       | <b>Brain - Hypothalamus</b>                      |

| Gencode Id         | Gene Symbol   | SNP Id   | A1/A2 | P-value | Effect Size | Tissue                               |
|--------------------|---------------|----------|-------|---------|-------------|--------------------------------------|
| ENSG00000198951.7  | NAGA          | rs134873 | T/G   | 2.3e-10 | 0.32        | Artery - Tibial                      |
| ENSG00000100197.16 | CYP2D6        | rs134873 | T/G   | 2.7e-10 | -0.46       | Cells - Transformed fibroblasts      |
| ENSG00000198951.7  | NAGA          | rs134873 | T/G   | 2.9e-10 | 0.60        | <b>Brain - Cerebellum</b>            |
| ENSG00000100197.16 | CYP2D6        | rs134873 | T/G   | 3.0e-10 | -0.73       | <b>Brain - Hippocampus</b>           |
| ENSG00000183172.8  | SMDT1         | rs134873 | T/G   | 3.3e-10 | 0.39        | Adipose - Subcutaneous               |
| ENSG00000183172.8  | SMDT1         | rs134873 | T/G   | 4.3e-10 | 0.42        | Skin - Sun Exposed (Lower leg)       |
| ENSG00000227370.1  | RP4-669P10.19 | rs134873 | T/G   | 1.5e-9  | -0.46       | Skin - Sun Exposed (Lower leg)       |
| ENSG00000100197.16 | CYP2D6        | rs134873 | T/G   | 1.8e-9  | -0.71       | <b>Brain - Frontal Cortex (BA9)</b>  |
| ENSG00000100197.16 | CYP2D6        | rs134873 | T/G   | 3.6e-9  | -0.63       | Adipose - Visceral (Omentum)         |
| ENSG00000198951.7  | NAGA          | rs134873 | T/G   | 8.6e-9  | 0.40        | Heart - Left Ventricle               |
| ENSG00000183172.8  | SMDT1         | rs134873 | T/G   | 1.2e-8  | 0.39        | Artery - Aorta                       |
| ENSG00000100197.16 | CYP2D6        | rs134873 | T/G   | 1.5e-8  | -0.44       | Nerve - Tibial                       |
| ENSG00000100197.16 | CYP2D6        | rs134873 | T/G   | 2.6e-8  | -0.80       | Pituitary                            |
| ENSG00000232710.1  | RP4-669P10.16 | rs134873 | T/G   | 3.2e-8  | 0.61        | Testis                               |
| ENSG00000198951.7  | NAGA          | rs134873 | T/G   | 5.1e-8  | 0.70        | Pituitary                            |
| ENSG00000198951.7  | NAGA          | rs134873 | T/G   | 5.4e-8  | 0.42        | Heart - Atrial Appendage             |
| ENSG00000100197.16 | CYP2D6        | rs134873 | T/G   | 5.4e-8  | -0.75       | <b>Brain - Cortex</b>                |
| ENSG00000198951.7  | NAGA          | rs134873 | T/G   | 5.6e-8  | 0.28        | Adipose - Visceral (Omentum)         |
| ENSG00000198951.7  | NAGA          | rs134873 | T/G   | 6.0e-8  | 0.60        | <b>Brain - Cerebellar Hemisphere</b> |
| ENSG00000100197.16 | CYP2D6        | rs134873 | T/G   | 6.8e-8  | -0.50       | Artery - Aorta                       |
| ENSG00000237037.5  | NDUFA6-AS1    | rs134873 | T/G   | 8.9e-8  | -0.34       | Skin - Sun Exposed (Lower leg)       |
| ENSG00000198951.7  | NAGA          | rs134873 | T/G   | 1.2e-7  | 0.35        | Stomach                              |
| ENSG00000100197.16 | CYP2D6        | rs134873 | T/G   | 2.6e-7  | -0.61       | Cells - EBV-transformed lymphocytes  |
| ENSG00000183172.8  | SMDT1         | rs134873 | T/G   | 2.6e-7  | 0.38        | Esophagus - Muscularis               |
| ENSG00000198951.7  | NAGA          | rs134873 | T/G   | 4.1e-7  | 0.22        | Lung                                 |
| ENSG00000213790.2  | OLA1P1        | rs134873 | T/G   | 5.0e-7  | 0.75        | Liver                                |

| Gencode Id         | Gene Symbol   | SNP Id   | A1/A2 | P-value   | Effect Size | Tissue                                           |
|--------------------|---------------|----------|-------|-----------|-------------|--------------------------------------------------|
| ENSG00000183172.8  | SMDT1         | rs134873 | T/G   | 5.3e-7    | 0.23        | Muscle - Skeletal                                |
| ENSG00000183172.8  | SMDT1         | rs134873 | T/G   | 7.2e-7    | 0.40        | Adipose - Visceral (Omentum)                     |
| ENSG00000100197.16 | CYP2D6        | rs134873 | T/G   | 7.5e-7    | -0.59       | Pancreas                                         |
| ENSG00000100197.16 | CYP2D6        | rs134873 | T/G   | 9.8e-7    | -0.43       | Stomach                                          |
| ENSG00000100197.16 | CYP2D6        | rs134873 | T/G   | 0.0000011 | -0.62       | Artery - Coronary                                |
| ENSG00000100197.16 | CYP2D6        | rs134873 | T/G   | 0.0000011 | -0.54       | Adrenal Gland                                    |
| ENSG00000198951.7  | NAGA          | rs134873 | T/G   | 0.0000012 | 0.38        | <b>Brain - Nucleus accumbens (basal ganglia)</b> |
| ENSG00000183172.8  | SMDT1         | rs134873 | T/G   | 0.0000017 | 0.51        | Esophagus - Gastroesophageal Junction            |
| ENSG00000273366.1  | CTA-989H11.1  | rs134873 | T/G   | 0.0000017 | -0.35       | Esophagus - Mucosa                               |
| ENSG00000183172.8  | SMDT1         | rs134873 | T/G   | 0.0000021 | 0.52        | Colon - Sigmoid                                  |
| ENSG00000183172.8  | SMDT1         | rs134873 | T/G   | 0.0000024 | 0.59        | Cells - EBV-transformed lymphocytes              |
| ENSG00000198951.7  | NAGA          | rs134873 | T/G   | 0.0000027 | 0.30        | Breast - Mammary Tissue                          |
| ENSG00000183172.8  | SMDT1         | rs134873 | T/G   | 0.0000044 | 0.28        | Thyroid                                          |
| ENSG00000183172.8  | SMDT1         | rs134873 | T/G   | 0.0000046 | 0.51        | Pituitary                                        |
| ENSG00000227370.1  | RP4-669P10.19 | rs134873 | T/G   | 0.0000062 | 0.44        | Testis                                           |
| ENSG00000100197.16 | CYP2D6        | rs134873 | T/G   | 0.0000065 | -0.76       | <b>Brain - Anterior cingulate cortex (BA24)</b>  |
| ENSG00000270083.1  | RP1-257I20.14 | rs134873 | T/G   | 0.0000071 | 0.60        | <b>Brain - Cerebellum</b>                        |
| ENSG00000183172.8  | SMDT1         | rs134873 | T/G   | 0.0000097 | 0.42        | Skin - Not Sun Exposed (Suprapubic)              |
| ENSG00000100197.16 | CYP2D6        | rs134873 | T/G   | 0.000010  | -0.63       | Prostate                                         |
| ENSG00000198951.7  | NAGA          | rs134873 | T/G   | 0.000010  | 0.36        | <b>Brain - Frontal Cortex (BA9)</b>              |
| ENSG00000232710.1  | RP4-669P10.16 | rs134873 | T/G   | 0.000010  | 0.67        | Ovary                                            |
| ENSG00000100197.16 | CYP2D6        | rs134873 | T/G   | 0.000013  | -0.40       | Breast - Mammary Tissue                          |
| ENSG00000227370.1  | RP4-669P10.19 | rs134873 | T/G   | 0.000013  | -0.64       | <b>Brain - Hypothalamus</b>                      |
| ENSG00000183172.8  | SMDT1         | rs134873 | T/G   | 0.000019  | 0.71        | Ovary                                            |
| ENSG00000183172.8  | SMDT1         | rs134873 | T/G   | 0.000020  | 0.48        | Pancreas                                         |
| ENSG00000182057.4  | Z83851.3      | rs134873 | T/G   | 0.000021  | 0.42        | Artery - Aorta                                   |



| <b>Gencode Id</b> | <b>Gene Symbol</b> | <b>SNP Id</b> | <b>A1/A2</b> | <b>P-value</b> | <b>Effect Size</b> | <b>Tissue</b>                       |
|-------------------|--------------------|---------------|--------------|----------------|--------------------|-------------------------------------|
| ENSG00000273366.1 | CTA-989H11.1       | rs134873      | T/G          | 0.000027       | -0.42              | Testis                              |
| ENSG00000183172.8 | SMDT1              | rs134873      | T/G          | 0.000027       | 0.27               | Esophagus - Mucosa                  |
| ENSG00000183172.8 | SMDT1              | rs134873      | T/G          | 0.000034       | 0.27               | Nerve - Tibial                      |
| ENSG00000182057.4 | Z83851.3           | rs134873      | T/G          | 0.000035       | 0.35               | Thyroid                             |
| ENSG00000183172.8 | SMDT1              | rs134873      | T/G          | 0.000041       | 0.41               | Colon - Transverse                  |
| ENSG00000183172.8 | SMDT1              | rs134873      | T/G          | 0.000042       | 0.33               | Stomach                             |
| ENSG00000183172.8 | SMDT1              | rs134873      | T/G          | 0.000055       | 0.22               | Artery - Tibial                     |
| ENSG00000237037.5 | NDUFA6-AS1         | rs134873      | T/G          | 0.000057       | -0.32              | Skin - Not Sun Exposed (Suprapubic) |
| ENSG00000270083.1 | RP1-257I20.14      | rs134873      | T/G          | 0.000067       | 0.29               | Thyroid                             |
| ENSG00000227370.1 | RP4-669P10.19      | rs134873      | T/G          | 0.00011        | -0.36              | Esophagus - Muscularis              |

**eTable 5.** Cis-eQTL Data in Human Brain Using UK Brain Expression Consortium Data (www.braineac.org). Expression Affected by SNP Shown by the Exon-Specific Probeset or Transcript-Level ("t"+exprID; Winsorised mean over probesets). SNPs With Significant Brain eQTL Functionality Using GTEx Data Were Assessed (Table S4). Data for rs7857165 Were Not Available.

| Gene                     | SNP        | ExprID   | Chr  | Start     | Stop      | Average of brain tissues | Cerebellum | Frontal cortex | Hippocampus | Medulla | Occip. cortex | Putamen | Subst. Nigra | Temp. Cortex | Thalamus | White Matter |
|--------------------------|------------|----------|------|-----------|-----------|--------------------------|------------|----------------|-------------|---------|---------------|---------|--------------|--------------|----------|--------------|
| KCNJ3                    | rs67338739 | 2511170  | chr2 | 155482391 | 155714866 | 2.5e-02                  | 9.2e-02    | 9.0e-01        | 3.3e-03     | 1.4e-01 | 2.5e-01       | 1.9e-01 | 7.2e-01      | 7.6e-01      | 2.6e-01  | 1.2e-01      |
| KCNJ3                    | rs67338739 | 2511169  | chr2 | 155482391 | 155714866 | 2.3e-02                  | 3.8e-02    | 8.4e-01        | 3.3e-03     | 1.5e-01 | 1.8e-01       | 2.5e-01 | 9.3e-01      | 6.8e-01      | 2.4e-01  | 1.0e-01      |
| KCNJ3                    | rs67338739 | t2511153 | chr2 | 155482391 | 155714866 | 1.8e-02                  | 1.3e-02    | 9.5e-01        | 4.3e-03     | 2.8e-01 | 2.1e-01       | 1.8e-01 | 4.5e-01      | 6.8e-01      | 2.5e-01  | 1.8e-01      |
| KCNJ3                    | rs67338739 | 2511185  | chr2 | 155482391 | 155714866 | 5.7e-03                  | 9.7e-03    | 5.8e-01        | 4.9e-03     | 4.9e-01 | 2.0e-01       | 5.0e-01 | 1.2e-01      | 5.2e-01      | 4.9e-01  | 3.7e-02      |
| KCNJ3                    | rs67338739 | 2511166  | chr2 | 155482391 | 155714866 | 9.7e-03                  | 8.8e-02    | 5.0e-01        | 5.5e-03     | 1.7e-01 | 1.8e-01       | 1.3e-01 | 3.4e-01      | 6.2e-01      | 2.5e-01  | 1.2e-01      |
| KCNJ3                    | rs67338739 | 2511171  | chr2 | 155482391 | 155714866 | 5.0e-02                  | 1.4e-01    | 8.8e-01        | 1.1e-02     | 3.0e-02 | 6.0e-01       | 1.3e-01 | 3.5e-01      | 8.2e-01      | 3.0e-01  | 7.7e-01      |
| KCNJ3                    | rs67338739 | 2511184  | chr2 | 155482391 | 155714866 | 2.1e-02                  | 9.0e-02    | 4.1e-01        | 1.9e-02     | 7.1e-01 | 3.2e-01       | 1.6e-01 | 6.5e-01      | 5.3e-01      | 2.0e-01  | 1.1e-01      |
| KCNJ3                    | rs67338739 | 2511165  | chr2 | 155482391 | 155714866 | 3.6e-02                  | 4.3e-02    | 7.4e-01        | 3.6e-02     | 4.3e-01 | 8.6e-02       | 9.7e-01 | 7.8e-01      | 7.5e-01      | 2.5e-01  | 7.0e-01      |
| KCNJ3                    | rs67338739 | 2511164  | chr2 | 155482391 | 155714866 | 5.9e-01                  | 3.3e-01    | 8.0e-01        | 9.2e-01     | 4.5e-02 | 5.2e-01       | 2.4e-01 | 3.6e-01      | 4.8e-01      | 5.6e-01  | 7.6e-01      |
| GNL3,GLT8D1,<br>SNORD19B | rs4282054  | 2624078  | chr3 | 52719936  | 52730172  | 1.4e-04                  | 9.0e-02    | 2.2e-02        | 1.9e-01     | 4.8e-04 | 1.4e-01       | 1.8e-01 | 5.6e-02      | 5.8e-01      | 4.2e-02  | 5.4e-01      |
| GNL3,GLT8D1,<br>SNORD19B | rs4282054  | 2624081  | chr3 | 52719936  | 52730172  | 8.2e-04                  | 3.8e-03    | 2.2e-01        | 1.3e-01     | 3.2e-01 | 2.0e-02       | 4.9e-01 | 5.3e-01      | 2.0e-01      | 1.8e-01  | 7.7e-01      |
| GNL3,GLT8D1,<br>SNORD19B | rs4282054  | 2624108  | chr3 | 52719936  | 52730172  | 4.1e-01                  | 8.1e-01    | 5.6e-01        | 6.8e-01     | 2.2e-01 | 4.9e-01       | 7.7e-01 | 4.8e-01      | 6.7e-01      | 1.1e-02  | 4.7e-01      |
| GNL3,GLT8D1,<br>SNORD19B | rs4282054  | 2624082  | chr3 | 52719936  | 52730172  | 2.5e-02                  | 1.1e-01    | 1.4e-01        | 3.9e-01     | 1.1e-01 | 2.5e-02       | 5.8e-01 | 4.0e-01      | 6.0e-01      | 8.3e-01  | 5.2e-01      |
| GNL3,GLT8D1,<br>SNORD19B | rs4282054  | 2624106  | chr3 | 52719936  | 52730172  | 8.3e-01                  | 4.7e-01    | 7.6e-01        | 8.0e-01     | 9.3e-01 | 5.8e-01       | 4.8e-02 | 2.7e-01      | 8.8e-01      | 9.9e-01  | 4.8e-01      |
| GNL3,GLT8D1,<br>SNORD19B | rs4282054  | 2624075  | chr3 | 52719936  | 52730172  | 1.6e-01                  | 5.8e-01    | 9.3e-02        | 8.9e-01     | 4.9e-01 | 5.6e-02       | 6.9e-01 | 1.8e-01      | 3.0e-01      | 1.4e-01  | 7.4e-01      |
| GNL3,GLT8D1,<br>SNORD19B | rs4282054  | 2624109  | chr3 | 52719936  | 52730172  | 5.3e-01                  | 2.5e-01    | 2.9e-01        | 6.3e-01     | 3.4e-01 | 8.1e-01       | 6.4e-02 | 3.5e-01      | 3.4e-01      | 5.6e-01  | 9.6e-01      |
| GNL3,GLT8D1,<br>SNORD19B | rs4282054  | 2624100  | chr3 | 52719936  | 52730172  | 8.9e-02                  | 7.3e-02    | 3.0e-01        | 1.6e-01     | 4.1e-01 | 1.3e-01       | 9.5e-01 | 3.2e-01      | 1.8e-01      | 8.1e-01  | 5.1e-01      |
| GNL3,GLT8D1,<br>SNORD19B | rs4282054  | 2624087  | chr3 | 52719936  | 52730172  | 7.5e-02                  | 1.8e-01    | 3.9e-01        | 8.0e-02     | 8.1e-01 | 1.9e-01       | 8.6e-01 | 2.1e-01      | 1.0e-01      | 7.7e-01  | 8.6e-01      |
| GNL3,GLT8D1,<br>SNORD19B | rs4282054  | 2624096  | chr3 | 52719936  | 52730172  | 3.5e-01                  | 2.3e-01    | 7.7e-01        | 8.0e-01     | 6.4e-01 | 3.4e-01       | 7.3e-01 | 9.4e-02      | 2.8e-01      | 4.1e-01  | 8.5e-01      |

| Gene                     | SNP       | ExprID   | Chr  | Start    | Stop     | Average<br>of brain<br>tissues | Cere-<br>bellum | Frontal<br>cortex | Hippo-<br>campus | Medulla | Occip.<br>cortex | Putamen | Subst.<br>Nigra | Temp.<br>Cortex | Thalamus | White<br>Matter |
|--------------------------|-----------|----------|------|----------|----------|--------------------------------|-----------------|-------------------|------------------|---------|------------------|---------|-----------------|-----------------|----------|-----------------|
| GNL3,GLT8D1,<br>SNORD19B | rs4282054 | 2624107  | chr3 | 52719936 | 52730172 | 9.9e-01                        | 1.7e-01         | 5.2e-01           | 5.6e-01          | 6.9e-01 | 5.4e-01          | 1.1e-01 | 7.3e-01         | 6.0e-01         | 5.1e-01  | 5.3e-01         |
| GNL3,GLT8D1,<br>SNORD19B | rs4282054 | 2624093  | chr3 | 52719936 | 52730172 | 9.4e-01                        | 9.3e-01         | 3.0e-01           | 4.8e-01          | 4.0e-01 | 7.2e-01          | 1.1e-01 | 5.8e-01         | 5.7e-01         | 9.6e-01  | 9.2e-01         |
| GNL3,GLT8D1,<br>SNORD19B | rs4282054 | 2624102  | chr3 | 52719936 | 52730172 | 8.8e-01                        | 7.5e-01         | 2.6e-01           | 8.8e-01          | 5.8e-01 | 6.6e-01          | 1.1e-01 | 2.7e-01         | 6.0e-01         | 3.8e-01  | 1.0e+00         |
| GNL3,GLT8D1,<br>SNORD19B | rs4282054 | 2624095  | chr3 | 52719936 | 52730172 | 6.5e-01                        | 7.7e-01         | 6.0e-01           | 5.0e-01          | 6.4e-01 | 5.6e-01          | 1.2e-01 | 2.9e-01         | 5.8e-01         | 5.2e-01  | 5.7e-01         |
| GNL3,GLT8D1,<br>SNORD19B | rs4282054 | 2624083  | chr3 | 52719936 | 52730172 | 2.7e-01                        | 2.3e-01         | 5.6e-01           | 5.6e-01          | 4.9e-01 | 1.4e-01          | 3.1e-01 | 1.8e-01         | 2.0e-01         | 2.9e-01  | 9.1e-01         |
| GNL3,GLT8D1,<br>SNORD19B | rs4282054 | 2624092  | chr3 | 52719936 | 52730172 | 4.7e-01                        | 8.7e-01         | 6.6e-01           | 5.5e-01          | 9.6e-01 | 9.4e-01          | 5.3e-01 | 7.8e-01         | 2.5e-01         | 1.5e-01  | 4.4e-01         |
| GNL3,GLT8D1,<br>SNORD19B | rs4282054 | 2624084  | chr3 | 52719936 | 52730172 | 7.6e-01                        | 1.6e-01         | 1.6e-01           | 2.7e-01          | 7.9e-01 | 4.9e-01          | 5.5e-01 | 1.0e+00         | 8.6e-01         | 6.4e-01  | 7.1e-01         |
| GNL3,GLT8D1,<br>SNORD19B | rs4282054 | 2624091  | chr3 | 52719936 | 52730172 | 5.5e-01                        | 9.7e-01         | 9.1e-01           | 9.3e-01          | 6.7e-01 | 9.8e-01          | 1.7e-01 | 7.9e-01         | 2.5e-01         | 3.8e-01  | 1.8e-01         |
| GNL3,GLT8D1,<br>SNORD19B | rs4282054 | 2624076  | chr3 | 52719936 | 52730172 | 8.8e-01                        | 5.3e-01         | 3.7e-01           | 9.6e-01          | 2.7e-01 | 2.0e-01          | 5.6e-01 | 2.0e-01         | 8.6e-01         | 3.4e-01  | 2.3e-01         |
| GNL3,GLT8D1,<br>SNORD19B | rs4282054 | t2624074 | chr3 | 52719936 | 52730172 | 3.2e-01                        | 2.3e-01         | 4.4e-01           | 4.1e-01          | 9.0e-01 | 2.0e-01          | 3.2e-01 | 2.5e-01         | 6.1e-01         | 8.8e-01  | 9.6e-01         |
| GNL3,GLT8D1,<br>SNORD19B | rs4282054 | 2624098  | chr3 | 52719936 | 52730172 | 5.2e-01                        | 5.6e-01         | 9.4e-01           | 6.7e-01          | 8.6e-01 | 3.3e-01          | 7.8e-01 | 7.1e-01         | 7.8e-01         | 3.3e-01  | 7.6e-01         |
| GLYCTK                   | rs4282054 | 2623622  | chr3 | 52321125 | 52329252 | 1.6e-02                        | 2.3e-01         | 1.4e-01           | 7.8e-01          | 6.4e-01 | 1.8e-01          | 9.8e-01 | 1.0e-02         | 5.7e-01         | 7.4e-01  | 5.5e-02         |
| GLYCTK                   | rs4282054 | 2623625  | chr3 | 52321125 | 52329252 | 9.2e-02                        | 1.3e-01         | 7.3e-02           | 1.5e-01          | 1.3e-01 | 2.1e-02          | 2.5e-01 | 1.5e-01         | 5.2e-01         | 7.5e-01  | 4.3e-01         |
| GLYCTK                   | rs4282054 | 2623618  | chr3 | 52321125 | 52329252 | 7.9e-01                        | 9.8e-01         | 2.8e-01           | 4.9e-01          | 7.5e-01 | 6.8e-01          | 5.5e-01 | 1.0e+00         | 4.7e-01         | 7.1e-01  | 4.8e-02         |
| GLYCTK                   | rs4282054 | 2623623  | chr3 | 52321125 | 52329252 | 6.7e-02                        | 3.4e-01         | 6.9e-02           | 1.2e-01          | 3.2e-01 | 3.6e-01          | 3.0e-01 | 9.0e-02         | 8.5e-01         | 3.8e-01  | 4.9e-01         |
| GLYCTK                   | rs4282054 | 2623629  | chr3 | 52321125 | 52329252 | 3.3e-01                        | 7.5e-01         | 2.2e-01           | 8.3e-01          | 8.3e-01 | 6.4e-01          | 6.7e-01 | 7.5e-02         | 8.1e-01         | 2.9e-01  | 7.9e-01         |
| GLYCTK                   | rs4282054 | 2623632  | chr3 | 52321125 | 52329252 | 2.9e-01                        | 6.4e-01         | 9.3e-01           | 4.8e-01          | 6.6e-01 | 3.8e-01          | 5.8e-01 | 4.5e-01         | 3.6e-01         | 4.2e-01  | 7.7e-02         |
| GLYCTK                   | rs4282054 | 2623630  | chr3 | 52321125 | 52329252 | 7.5e-01                        | 6.2e-01         | 8.2e-01           | 3.5e-01          | 1.6e-01 | 8.5e-01          | 5.3e-01 | 6.9e-01         | 7.9e-02         | 8.5e-01  | 5.5e-01         |
| GLYCTK                   | rs4282054 | 2623631  | chr3 | 52321125 | 52329252 | 3.7e-01                        | 1.9e-01         | 8.3e-01           | 1.2e-01          | 2.1e-01 | 1.1e-01          | 5.2e-01 | 3.4e-01         | 6.6e-01         | 4.8e-01  | 4.1e-01         |
| GLYCTK                   | rs4282054 | 2623621  | chr3 | 52321125 | 52329252 | 2.6e-01                        | 5.9e-01         | 8.3e-01           | 2.3e-01          | 6.0e-01 | 5.8e-01          | 7.9e-01 | 1.0e+00         | 1.4e-01         | 1.4e-01  | 1.4e-01         |
| GLYCTK                   | rs4282054 | 2623616  | chr3 | 52321125 | 52329252 | 7.9e-01                        | 1.5e-01         | 5.7e-01           | 3.3e-01          | 1.7e-01 | 5.6e-01          | 2.9e-01 | 4.1e-01         | 2.9e-01         | 8.0e-01  | 4.7e-01         |

| Gene   | SNP       | ExprID   | Chr   | Start    | Stop     | Average<br>of brain<br>tissues | Cere-<br>bellum | Frontal<br>cortex | Hippo-<br>campus | Medulla | Occip.<br>cortex | Putamen | Subst.<br>Nigra | Temp.<br>Cortex | Thalamus | White<br>Matter |
|--------|-----------|----------|-------|----------|----------|--------------------------------|-----------------|-------------------|------------------|---------|------------------|---------|-----------------|-----------------|----------|-----------------|
| GLYCTK | rs4282054 | t2623611 | chr3  | 52321125 | 52329252 | 1.9e-01                        | 2.1e-01         | 1.9e-01           | 3.0e-01          | 2.0e-01 | 9.4e-01          | 9.7e-01 | 3.4e-01         | 3.6e-01         | 9.6e-01  | 5.8e-01         |
| GLYCTK | rs4282054 | 2623624  | chr3  | 52321125 | 52329252 | 3.9e-01                        | 4.8e-01         | 7.4e-01           | 3.7e-01          | 5.8e-01 | 5.4e-01          | 7.7e-01 | 5.2e-01         | 8.5e-01         | 5.0e-01  | 2.0e-01         |
| GLYCTK | rs4282054 | 2623633  | chr3  | 52321125 | 52329252 | 8.0e-01                        | 7.8e-01         | 7.0e-01           | 5.3e-01          | 6.9e-01 | 4.7e-01          | 8.0e-01 | 4.8e-01         | 7.5e-01         | 4.3e-01  | 6.9e-01         |
| GLYCTK | rs4282054 | 2623627  | chr3  | 52321125 | 52329252 | 6.7e-01                        | 8.6e-01         | 8.5e-01           | 7.6e-01          | 3.3e-01 | 3.3e-01          | 2.1e-01 | 6.6e-01         | 4.9e-01         | 4.9e-01  | 4.9e-01         |
| ADAL   | rs524908  | 3591367  | chr15 | 43622052 | 43646685 | 2.1e-04                        | 2.4e-03         | 2.1e-02           | 1.9e-02          | 6.7e-02 | 4.1e-02          | 8.1e-02 | 9.4e-02         | 1.7e-03         | 1.8e-02  | 1.8e-03         |
| ADAL   | rs524908  | 3591387  | chr15 | 43622052 | 43646685 | 4.8e-02                        | 6.4e-04         | 9.6e-01           | 7.0e-01          | 7.9e-01 | 5.2e-04          | 9.3e-01 | 3.2e-01         | 1.3e-01         | 3.8e-01  | 8.5e-01         |
| ADAL   | rs524908  | 3591384  | chr15 | 43622052 | 43646685 | 2.3e-02                        | 5.0e-01         | 3.9e-01           | 2.7e-01          | 1.3e-01 | 4.4e-02          | 3.3e-01 | 1.2e-03         | 9.8e-01         | 6.0e-01  | 7.9e-02         |
| ADAL   | rs524908  | 3591389  | chr15 | 43622052 | 43646685 | 2.7e-02                        | 8.2e-03         | 1.8e-01           | 4.9e-01          | 8.5e-02 | 1.5e-03          | 6.6e-01 | 2.3e-01         | 1.3e-01         | 1.0e-01  | 5.2e-01         |
| ADAL   | rs524908  | 3591383  | chr15 | 43622052 | 43646685 | 5.2e-02                        | 1.8e-01         | 7.7e-01           | 5.9e-01          | 2.5e-02 | 1.3e-01          | 7.5e-01 | 3.7e-03         | 7.1e-01         | 8.6e-01  | 9.4e-01         |
| ADAL   | rs524908  | 3591390  | chr15 | 43622052 | 43646685 | 3.0e-02                        | 8.5e-03         | 8.3e-01           | 4.6e-01          | 2.1e-01 | 4.9e-03          | 7.4e-01 | 4.5e-02         | 1.2e-02         | 5.4e-01  | 4.4e-01         |
| ADAL   | rs524908  | 3591370  | chr15 | 43622052 | 43646685 | 2.4e-02                        | 4.0e-01         | 2.8e-01           | 4.0e-01          | 6.9e-03 | 7.1e-02          | 1.7e-02 | 4.7e-02         | 5.8e-01         | 3.6e-01  | 9.6e-01         |
| ADAL   | rs524908  | t3591365 | chr15 | 43622052 | 43646685 | 1.0e-01                        | 1.4e-02         | 9.5e-01           | 5.3e-01          | 8.2e-02 | 3.7e-02          | 4.8e-01 | 6.9e-02         | 2.9e-01         | 1.7e-01  | 9.6e-01         |
| ADAL   | rs524908  | 3591382  | chr15 | 43622052 | 43646685 | 4.8e-01                        | 8.2e-01         | 4.5e-01           | 5.9e-01          | 5.5e-01 | 2.9e-01          | 8.7e-01 | 5.3e-01         | 5.0e-01         | 2.2e-02  | 2.2e-01         |
| ADAL   | rs524908  | 3591372  | chr15 | 43622052 | 43646685 | 8.0e-01                        | 3.8e-01         | 8.2e-01           | 3.1e-01          | 5.1e-01 | 9.2e-01          | 4.7e-01 | 2.5e-02         | 6.4e-01         | 1.8e-01  | 9.7e-01         |
| ADAL   | rs524908  | 3591391  | chr15 | 43622052 | 43646685 | 2.3e-01                        | 3.1e-02         | 5.2e-01           | 8.0e-01          | 1.1e-01 | 5.2e-02          | 8.6e-01 | 4.6e-01         | 9.7e-02         | 2.3e-01  | 1.8e-01         |
| ADAL   | rs524908  | 3591385  | chr15 | 43622052 | 43646685 | 2.2e-01                        | 9.6e-01         | 1.0e-01           | 7.9e-01          | 3.3e-01 | 7.5e-01          | 2.7e-01 | 2.0e-01         | 3.1e-02         | 4.0e-01  | 3.7e-01         |
| ADAL   | rs524908  | 3591392  | chr15 | 43622052 | 43646685 | 1.8e-01                        | 3.5e-02         | 9.0e-01           | 5.6e-01          | 6.0e-02 | 4.7e-02          | 7.1e-01 | 1.6e-01         | 9.6e-01         | 3.5e-01  | 9.9e-01         |
| ADAL   | rs524908  | 3591379  | chr15 | 43622052 | 43646685 | 2.0e-01                        | 1.7e-01         | 7.0e-01           | 5.0e-01          | 7.9e-01 | 2.8e-01          | 5.4e-02 | 2.0e-01         | 9.1e-01         | 5.2e-01  | 7.6e-01         |
| ADAL   | rs524908  | 3591373  | chr15 | 43622052 | 43646685 | 9.1e-01                        | 6.7e-01         | 1.5e-01           | 6.2e-01          | 4.9e-01 | 9.8e-01          | 7.6e-01 | 3.9e-01         | 3.7e-01         | 6.0e-02  | 9.2e-01         |
| ADAL   | rs524908  | 3591381  | chr15 | 43622052 | 43646685 | 1.9e-01                        | 6.3e-01         | 3.9e-01           | 2.2e-01          | 9.4e-02 | 4.5e-01          | 1.8e-01 | 7.1e-02         | 9.4e-01         | 9.5e-01  | 9.5e-01         |
| ADAL   | rs524908  | 3591376  | chr15 | 43622052 | 43646685 | 7.1e-01                        | 7.4e-01         | 1.0e-01           | 9.7e-01          | 1.8e-01 | 5.2e-01          | 4.6e-01 | 7.9e-02         | 5.9e-01         | 3.3e-01  | 8.4e-01         |
| ADAL   | rs524908  | 3591388  | chr15 | 43622052 | 43646685 | 7.5e-01                        | 1.9e-01         | 1.8e-01           | 8.2e-02          | 4.6e-01 | 4.8e-01          | 2.5e-01 | 3.5e-01         | 1.0e-01         | 8.3e-01  | 1.9e-01         |
| ADAL   | rs524908  | 3591366  | chr15 | 43622052 | 43646685 | 2.0e-01                        | 6.2e-01         | 2.5e-01           | 7.8e-01          | 7.7e-01 | 1.5e-01          | 5.8e-01 | 1.4e-01         | 9.9e-02         | 6.9e-01  | 4.2e-01         |
| STRC   | rs524908  | 3621378  | chr15 | 43891605 | 43910968 | 1.9e-06                        | 3.6e-01         | 3.1e-03           | 1.6e-03          | 4.3e-02 | 2.1e-02          | 6.9e-02 | 5.6e-05         | 1.3e-05         | 3.4e-03  | 2.9e-03         |
| STRC   | rs524908  | 3621380  | chr15 | 43891605 | 43910968 | 5.5e-05                        | 1.1e-01         | 7.7e-04           | 2.0e-01          | 2.0e-02 | 3.2e-03          | 4.2e-01 | 7.3e-02         | 1.9e-05         | 1.7e-02  | 6.2e-02         |

| Gene                | SNP      | ExprID   | Chr   | Start    | Stop     | Average<br>of brain<br>tissues | Cere-<br>bellum | Frontal<br>cortex | Hippo-<br>campus | Medulla | Occip.<br>cortex | Putamen | Subst.<br>Nigra | Temp.<br>Cortex | Thalamus | White<br>Matter |
|---------------------|----------|----------|-------|----------|----------|--------------------------------|-----------------|-------------------|------------------|---------|------------------|---------|-----------------|-----------------|----------|-----------------|
| STRC                | rs524908 | t3621351 | chr15 | 43891605 | 43910968 | 3.1e-05                        | 6.5e-02         | 8.9e-03           | 1.5e-01          | 3.4e-02 | 3.4e-03          | 2.0e-01 | 8.2e-03         | 5.8e-04         | 4.1e-03  | 4.0e-03         |
| STRC                | rs524908 | 3621376  | chr15 | 43891605 | 43910968 | 2.1e-04                        | 7.2e-02         | 1.9e-01           | 3.8e-03          | 1.3e-01 | 1.3e-01          | 5.3e-01 | 6.7e-02         | 4.0e-02         | 2.4e-02  | 2.7e-03         |
| STRC                | rs524908 | 3621366  | chr15 | 43891605 | 43910968 | 2.3e-03                        | 4.7e-01         | 4.0e-01           | 6.0e-01          | 1.4e-02 | 7.8e-01          | 6.0e-02 | 1.2e-02         | 1.7e-01         | 5.3e-01  | 8.0e-02         |
| STRC                | rs524908 | 3621373  | chr15 | 43891605 | 43910968 | 6.2e-01                        | 8.5e-01         | 6.3e-01           | 8.2e-01          | 6.7e-01 | 1.5e-02          | 7.4e-01 | 5.2e-01         | 9.1e-01         | 8.0e-01  | 6.7e-01         |
| STRC                | rs524908 | 3621367  | chr15 | 43891605 | 43910968 | 2.2e-02                        | 1.1e-01         | 3.4e-01           | 6.8e-01          | 8.0e-02 | 4.9e-02          | 4.7e-01 | 3.9e-02         | 2.1e-02         | 4.0e-02  | 4.0e-01         |
| STRC                | rs524908 | 3621352  | chr15 | 43891605 | 43910968 | 4.5e-01                        | 9.3e-01         | 3.0e-01           | 9.2e-01          | 6.7e-01 | 7.7e-01          | 1.7e-01 | 8.8e-01         | 3.5e-01         | 8.5e-01  | 6.4e-01         |
| CYP2D7P1,CY<br>P2D6 | rs134873 | t3962293 | chr22 | 42535612 | 42551082 | 1.6e-05                        | 2.8e-02         | 2.2e-01           | 9.1e-04          | 2.2e-01 | 1.7e-01          | 1.3e-01 | 1.9e-01         | 3.0e-01         | 2.0e-02  | 3.3e-02         |
| CYP2D7P1,CY<br>P2D6 | rs134873 | 3962299  | chr22 | 42535612 | 42551082 | 4.0e-05                        | 9.1e-03         | 3.7e-02           | 2.4e-02          | 8.3e-01 | 4.4e-01          | 5.9e-02 | 1.8e-02         | 4.9e-01         | 1.2e-03  | 3.0e-02         |
| CYP2D7P1,CY<br>P2D6 | rs134873 | 3962306  | chr22 | 42535612 | 42551082 | 4.3e-04                        | 1.0e-01         | 8.9e-01           | 6.0e-03          | 3.4e-01 | 5.6e-01          | 7.7e-01 | 8.6e-01         | 7.1e-02         | 6.6e-02  | 5.5e-03         |
| CYP2D7P1,CY<br>P2D6 | rs134873 | 3962308  | chr22 | 42535612 | 42551082 | 5.0e-03                        | 4.4e-02         | 4.4e-01           | 4.5e-04          | 4.6e-01 | 8.6e-02          | 3.5e-01 | 5.3e-02         | 3.5e-01         | 2.6e-01  | 1.3e-02         |
| CYP2D7P1,CY<br>P2D6 | rs134873 | 3962294  | chr22 | 42535612 | 42551082 | 6.6e-03                        | 4.2e-01         | 9.0e-02           | 9.3e-02          | 1.8e-01 | 8.6e-01          | 3.4e-01 | 6.6e-01         | 6.1e-01         | 3.1e-01  | 5.4e-01         |
| CYP2D7P1,CY<br>P2D6 | rs134873 | 3962312  | chr22 | 42535612 | 42551082 | 2.7e-02                        | 6.3e-01         | 9.9e-02           | 7.9e-02          | 1.5e-01 | 3.8e-01          | 3.6e-01 | 6.1e-01         | 5.1e-01         | 7.8e-01  | 2.5e-01         |
| CYP2D7P1,CY<br>P2D6 | rs134873 | 3962314  | chr22 | 42535612 | 42551082 | 5.4e-02                        | 7.9e-01         | 8.4e-02           | 6.1e-01          | 9.1e-01 | 2.8e-02          | 7.8e-01 | 1.4e-01         | 2.5e-01         | 1.2e-01  | 6.8e-01         |
| CYP2D7P1,CY<br>P2D6 | rs134873 | 3962295  | chr22 | 42535612 | 42551082 | 9.2e-01                        | 1.8e-01         | 8.9e-01           | 4.1e-01          | 3.7e-02 | 3.8e-01          | 5.9e-01 | 6.0e-01         | 9.7e-01         | 8.7e-01  | 2.6e-01         |
| NAGA                | rs134873 | 3962245  | chr22 | 42422833 | 42466846 | 2.5e-04                        | 4.9e-02         | 3.0e-03           | 4.2e-01          | 7.4e-01 | 7.9e-02          | 3.7e-02 | 3.3e-03         | 9.4e-01         | 3.7e-02  | 5.0e-02         |
| NAGA                | rs134873 | 3962232  | chr22 | 42422833 | 42466846 | 1.2e-02                        | 9.1e-02         | 2.8e-03           | 8.4e-01          | 3.0e-02 | 3.4e-01          | 5.6e-01 | 1.7e-01         | 2.8e-04         | 9.4e-01  | 5.3e-01         |
| NAGA                | rs134873 | t3962219 | chr22 | 42422833 | 42466846 | 6.4e-02                        | 3.8e-01         | 3.3e-04           | 9.1e-01          | 3.8e-01 | 7.9e-03          | 2.2e-02 | 3.6e-01         | 2.3e-03         | 9.3e-01  | 4.1e-01         |
| NAGA                | rs134873 | 3962231  | chr22 | 42422833 | 42466846 | 1.6e-01                        | 8.3e-01         | 5.5e-02           | 4.5e-01          | 1.3e-03 | 3.0e-01          | 2.5e-02 | 8.4e-01         | 4.4e-03         | 5.3e-01  | 8.3e-01         |
| NAGA                | rs134873 | 3962244  | chr22 | 42422833 | 42466846 | 9.8e-02                        | 7.2e-01         | 1.6e-03           | 9.5e-01          | 9.7e-01 | 2.7e-01          | 3.8e-01 | 3.3e-01         | 6.9e-02         | 6.0e-01  | 3.1e-01         |
| NAGA                | rs134873 | 3962239  | chr22 | 42422833 | 42466846 | 7.7e-02                        | 1.8e-01         | 1.1e-02           | 3.9e-01          | 9.0e-01 | 1.8e-03          | 1.2e-01 | 8.9e-01         | 1.1e-01         | 5.0e-01  | 3.3e-01         |
| NAGA                | rs134873 | 3962240  | chr22 | 42422833 | 42466846 | 8.9e-01                        | 7.1e-01         | 2.9e-01           | 3.3e-01          | 8.8e-01 | 9.9e-03          | 8.8e-01 | 6.5e-01         | 5.6e-02         | 4.3e-02  | 9.2e-02         |
| NAGA                | rs134873 | 3962237  | chr22 | 42422833 | 42466846 | 1.6e-02                        | 8.0e-01         | 7.6e-02           | 4.4e-01          | 1.3e-01 | 1.0e-02          | 5.6e-02 | 9.7e-01         | 9.6e-02         | 3.4e-01  | 7.5e-01         |

| Gene | SNP      | ExprID  | Chr   | Start    | Stop     | Average<br>of brain<br>tissues | Cere-<br>bellum | Frontal<br>cortex | Hippo-<br>campus | Medulla | Occip.<br>cortex | Putamen | Subst.<br>Nigra | Temp.<br>Cortex | Thal-<br>amus | White<br>Matter |
|------|----------|---------|-------|----------|----------|--------------------------------|-----------------|-------------------|------------------|---------|------------------|---------|-----------------|-----------------|---------------|-----------------|
| NAGA | rs134873 | 3962236 | chr22 | 42422833 | 42466846 | 1.4e-01                        | 9.4e-01         | 1.2e-01           | 7.7e-01          | 3.7e-01 | 5.7e-01          | 1.9e-01 | 4.0e-01         | 2.4e-01         | 1.7e-02       | 9.5e-01         |
| NAGA | rs134873 | 3962238 | chr22 | 42422833 | 42466846 | 2.1e-02                        | 7.9e-01         | 2.3e-01           | 2.7e-01          | 6.5e-01 | 4.1e-02          | 7.3e-01 | 2.0e-01         | 5.8e-01         | 6.6e-01       | 1.8e-01         |
| NAGA | rs134873 | 3962234 | chr22 | 42422833 | 42466846 | 2.2e-02                        | 3.7e-01         | 6.2e-01           | 4.7e-01          | 9.0e-01 | 8.1e-02          | 1.5e-01 | 1.3e-01         | 8.1e-01         | 4.8e-01       | 6.1e-02         |
| NAGA | rs134873 | 3962247 | chr22 | 42422833 | 42466846 | 4.0e-01                        | 2.5e-02         | 9.3e-01           | 4.1e-01          | 2.0e-01 | 9.6e-02          | 4.3e-01 | 1.7e-01         | 5.8e-02         | 3.4e-01       | 1.8e-01         |
| NAGA | rs134873 | 3962233 | chr22 | 42422833 | 42466846 | 2.1e-01                        | 3.7e-01         | 1.0e-01           | 2.8e-01          | 4.1e-02 | 4.8e-01          | 7.5e-01 | 4.1e-01         | 2.9e-02         | 9.3e-01       | 8.3e-01         |
| NAGA | rs134873 | 3962249 | chr22 | 42422833 | 42466846 | 1.3e-01                        | 8.5e-01         | 2.1e-01           | 5.0e-01          | 9.4e-01 | 6.1e-01          | 4.3e-02 | 4.9e-01         | 3.2e-01         | 1.7e-01       | 1.4e-01         |
| NAGA | rs134873 | 3962248 | chr22 | 42422833 | 42466846 | 3.6e-01                        | 1.8e-01         | 9.4e-01           | 2.4e-01          | 9.3e-01 | 9.5e-01          | 1.8e-01 | 5.3e-01         | 6.4e-01         | 3.1e-01       | 5.8e-02         |
| NAGA | rs134873 | 3962243 | chr22 | 42422833 | 42466846 | 6.3e-01                        | 9.3e-01         | 1.1e-01           | 4.9e-01          | 4.8e-01 | 2.9e-01          | 4.7e-01 | 8.3e-01         | 2.4e-01         | 2.2e-01       | 2.1e-01         |
| NAGA | rs134873 | 3962241 | chr22 | 42422833 | 42466846 | 6.6e-01                        | 1.8e-01         | 3.4e-01           | 7.6e-01          | 6.8e-01 | 2.9e-01          | 5.5e-01 | 3.4e-01         | 7.1e-01         | 3.6e-01       | 9.6e-01         |
| NAGA | rs134873 | 3962221 | chr22 | 42422833 | 42466846 | 4.1e-01                        | 8.0e-01         | 1.9e-01           | 8.8e-01          | 8.0e-01 | 2.2e-01          | 6.3e-01 | 2.5e-01         | 2.3e-01         | 9.7e-01       | 8.7e-01         |

## eReferences

1. Benjamini Y, Hochberg Y. Controlling the False Discovery Rate: A Practical and Powerful Approach to Multiple Testing. *Journal of the Royal Statistical Society. Series B (Methodological)*. Vol 57: Blackwell Publishing; 1995:289-300.
2. Efron B. Size, power and false discovery rates. *The Annals of Statistics*. 2007;35(4):1351–1377.
3. Purcell S, Neale B, Todd-Brown K, et al. PLINK: a tool set for whole-genome association and population-based linkage analyses. *American journal of human genetics*. 2007;81(3):559-575.
4. Schweder T, Spjøtvoll E. Plots of P-Values to Evaluate Many Tests Simultaneously. *Biometrika*. 1982;69(3):493-502.
5. Schizophrenia Working Group of the Psychiatric Genomics C. Biological insights from 108 schizophrenia-associated genetic loci. *Nature*. 2014;511(7510):421-427.
6. Andreassen OA, Djurovic S, Thompson WK, et al. Improved detection of common variants associated with schizophrenia by leveraging pleiotropy with cardiovascular-disease risk factors. *American journal of human genetics*. 2013;92(2):197-209.
7. Andreassen OA, Thompson WK, Schork AJ, et al. Improved detection of common variants associated with schizophrenia and bipolar disorder using pleiotropy-informed conditional false discovery rate. *PLoS genetics*. 2013;9(4):e1003455.
8. Andreassen OA, Desikan RS, Wang Y, et al. Abundant genetic overlap between blood lipids and immune-mediated diseases indicates shared molecular genetic mechanisms. *PloS one*. 2015;10(4):e0123057.
9. Andreassen OA, Harbo HF, Wang Y, et al. Genetic pleiotropy between multiple sclerosis and schizophrenia but not bipolar disorder: implications for immune related disease mechanisms. *Molecular psychiatry*. 2014.
10. Nichols T, Brett M, Andersson J, Wager T, Poline JB. Valid conjunction inference with the minimum statistic. *Neuroimage*. 2005;25(3):653-660.
11. Kang HJ, Kawasawa YI, Cheng F, et al. Spatio-temporal transcriptome of the human brain. *Nature*. 2011;478(7370):483-489.
12. Trabzuni D, Ryten M, Walker R, et al. Quality control parameters on a large dataset of regionally dissected human control brains for whole genome expression studies. *Journal of neurochemistry*. 2011;119(2):275-282.
13. Pers TH, Karjalainen JM, Chan Y, et al. Biological interpretation of genome-wide association studies using predicted gene functions. *Nat Commun*. 2015;6:5890.
